# Supplementary material for: RNA-seq and phytohormone analysis reveals the culm color variation of Bambusa oldhamii Munro
Source: PeerJ. 2022 Jan 13;10:e12796. doi: 10.7717/peerj.12796 (PMC8761368; doi:10.7717/peerj.12796)
Supplement: Supplemental Information 5 [file peerj-10-12796-s005.xls]

## Sheet: Sheet1
Primers	Forward Primer	Reverse Primer
actin	GAGCGAGAAATTGTCAGGGA	GATGGCTGGAAGAGGACCT
unigene-21666.15994	GGAGGAGGCAGAGCAAGTGA	GCAAGAACAGCAACGACGAGA
unigene-21666.113648	CAGCCAGGGCAAGCTCATT	TCGCCGTTCCACTCCTTCA
unigene-21666.125526	GCCAATGAAGGCAACACGA	GCTGCAACAAATCACAAGGGA
unigene-21666.134631	CGAAACAAACCAGCCAGAAC	TCGTCCACGTCGAGAACCT
