# Supplementary material for: RNA-seq and phytohormone analysis reveals the culm color variation of Bambusa oldhamii Munro
Source: PeerJ. 2022 Jan 13;10:e12796. doi: 10.7717/peerj.12796 (PMC8761368; doi:10.7717/peerj.12796)
Supplement: Supplemental Information 6 [file peerj-10-12796-s006.xlsx]

## Sheet: Sheet1
Ontology	ID	Description	Count	GeneRatio	geneID
Biological process	GO:0009987	cellular process	131047	131047/219395	unigene-1.0/unigene-10.0/unigene-100005.0/unigene-100005.1/unigene-100016.0/unigene-10002.0/unigene-100027.0/unigene-100028.0/unigene-100030.0/unigene-100032.0/unigene-100033.0/unigene-10004.0/unigene-100043.0/unigene-100044.0/unigene-100045.0/unigene-100046.0/unigene-10005.0/unigene-100050.0/unigene-100052.0/unigene-100054.0/unigene-100055.0/unigene-100062.0/unigene-100067.0/unigene-100069.0/uni…
Biological process	GO:0008152	metabolic process	116785	116785/219395	unigene-1.0/unigene-100005.0/unigene-100005.1/unigene-100012.0/unigene-100014.0/unigene-100016.0/unigene-10002.0/unigene-100028.0/unigene-100030.0/unigene-100032.0/unigene-10004.0/unigene-100043.0/unigene-100044.0/unigene-100046.0/unigene-10005.0/unigene-100050.0/unigene-100052.0/unigene-100053.0/unigene-100054.0/unigene-100055.0/unigene-100062.0/unigene-100064.0/unigene-100065.0/unigene-100067.0…
Biological process	GO:0065007	biological regulation	53684	53684/219395	unigene-1.0/unigene-100016.0/unigene-100030.0/unigene-100032.0/unigene-100033.0/unigene-100043.0/unigene-100044.0/unigene-100046.0/unigene-100052.0/unigene-100054.0/unigene-100072.0/unigene-100090.0/unigene-100115.0/unigene-100129.0/unigene-100130.0/unigene-100133.0/unigene-100134.0/unigene-100135.0/unigene-100135.1/unigene-100135.3/unigene-100135.4/unigene-100138.0/unigene-100139.0/unigene-10014…
Biological process	GO:0050896	response to stimulus	51372	51372/219395	unigene-100016.0/unigene-100027.0/unigene-100030.0/unigene-100033.0/unigene-100043.0/unigene-100050.0/unigene-100052.0/unigene-100053.0/unigene-100072.0/unigene-100086.0/unigene-100090.0/unigene-100092.0/unigene-100130.0/unigene-100133.0/unigene-100134.0/unigene-100135.0/unigene-100135.1/unigene-100138.0/unigene-100139.0/unigene-10014.0/unigene-100146.0/unigene-10015.0/unigene-100155.0/unigene-10…
Biological process	GO:0050789	regulation of biological process	49206	49206/219395	unigene-1.0/unigene-100016.0/unigene-100030.0/unigene-100032.0/unigene-100033.0/unigene-100044.0/unigene-100046.0/unigene-100052.0/unigene-100054.0/unigene-100072.0/unigene-100090.0/unigene-100115.0/unigene-100129.0/unigene-100130.0/unigene-100133.0/unigene-100134.0/unigene-100135.0/unigene-100135.1/unigene-100135.3/unigene-100135.4/unigene-100138.0/unigene-100139.0/unigene-10014.0/unigene-100161…
Biological process	GO:0071840	cellular component organization or biogenesis	26632	26632/219395	unigene-10.0/unigene-10004.0/unigene-100043.0/unigene-100044.0/unigene-100045.0/unigene-100046.0/unigene-100072.0/unigene-100090.0/unigene-100146.0/unigene-100187.0/unigene-1002.0/unigene-100245.0/unigene-100245.2/unigene-100266.0/unigene-100267.0/unigene-100268.0/unigene-100285.1/unigene-100293.0/unigene-100304.0/unigene-100321.0/unigene-100335.0/unigene-100367.0/unigene-100382.0/unigene-100397.…
Biological process	GO:0032502	developmental process	23883	23883/219395	unigene-0.0/unigene-1.0/unigene-100016.0/unigene-100030.0/unigene-100032.0/unigene-10005.0/unigene-100072.0/unigene-10008.0/unigene-100090.0/unigene-100155.0/unigene-100184.0/unigene-100184.1/unigene-1002.0/unigene-100212.0/unigene-100273.0/unigene-100285.1/unigene-100304.0/unigene-100324.0/unigene-100367.0/unigene-100382.0/unigene-100393.0/unigene-100397.0/unigene-100404.0/unigene-100405.0/unige…
Biological process	GO:0051179	localization	23333	23333/219395	unigene-0.0/unigene-100045.0/unigene-10007.0/unigene-100090.0/unigene-100094.0/unigene-100096.0/unigene-100107.0/unigene-100124.0/unigene-100151.0/unigene-100165.0/unigene-100199.0/unigene-100202.0/unigene-10021.0/unigene-10021.1/unigene-10021.2/unigene-100212.0/unigene-10022.0/unigene-100221.0/unigene-100223.0/unigene-10026.0/unigene-100323.0/unigene-100424.0/unigene-10043.0/unigene-100440.0/uni…
Biological process	GO:0032501	multicellular organismal process	22306	22306/219395	unigene-0.0/unigene-100016.0/unigene-100030.0/unigene-100032.0/unigene-10005.0/unigene-100072.0/unigene-10008.0/unigene-100155.0/unigene-100184.0/unigene-100184.1/unigene-1002.0/unigene-100212.0/unigene-100273.0/unigene-100285.1/unigene-100318.0/unigene-100319.0/unigene-100320.0/unigene-100324.0/unigene-100367.0/unigene-100382.0/unigene-100393.0/unigene-100397.0/unigene-100404.0/unigene-100405.0/…
Biological process	GO:0023052	signaling	17891	17891/219395	unigene-100033.0/unigene-100072.0/unigene-100130.0/unigene-100133.0/unigene-100134.0/unigene-100139.0/unigene-10014.0/unigene-100161.0/unigene-100316.0/unigene-100323.0/unigene-100333.0/unigene-100371.0/unigene-100377.0/unigene-10038.0/unigene-100382.0/unigene-100413.0/unigene-100414.0/unigene-100430.0/unigene-100440.0/unigene-100521.0/unigene-100522.0/unigene-100540.0/unigene-100590.0/unigene-10…
Biological process	GO:0000003	reproduction	13459	13459/219395	unigene-100016.0/unigene-100030.0/unigene-100072.0/unigene-100245.0/unigene-100245.2/unigene-100273.0/unigene-100285.1/unigene-100318.0/unigene-100319.0/unigene-100320.0/unigene-100324.0/unigene-100367.0/unigene-100393.0/unigene-100397.0/unigene-100427.2/unigene-10043.0/unigene-100471.0/unigene-100581.0/unigene-100601.0/unigene-100602.0/unigene-100604.0/unigene-100605.0/unigene-100606.0/unigene-1…
Biological process	GO:0022414	reproductive process	13424	13424/219395	unigene-100016.0/unigene-100030.0/unigene-100072.0/unigene-100245.0/unigene-100245.2/unigene-100273.0/unigene-100285.1/unigene-100318.0/unigene-100319.0/unigene-100320.0/unigene-100324.0/unigene-100367.0/unigene-100393.0/unigene-100397.0/unigene-100427.2/unigene-10043.0/unigene-100471.0/unigene-100581.0/unigene-100601.0/unigene-100602.0/unigene-100604.0/unigene-100605.0/unigene-100606.0/unigene-1…
Biological process	GO:0051704	multi-organism process	12015	12015/219395	unigene-0.0/unigene-100016.0/unigene-100050.0/unigene-100130.0/unigene-100134.0/unigene-100139.0/unigene-100156.0/unigene-100157.0/unigene-100183.0/unigene-100190.0/unigene-100266.0/unigene-100267.0/unigene-100302.0/unigene-100318.0/unigene-100319.0/unigene-100320.0/unigene-100351.0/unigene-100371.0/unigene-10038.0/unigene-100397.0/unigene-100427.2/unigene-10043.0/unigene-100449.0/unigene-100452.…
Biological process	GO:0048518	positive regulation of biological process	10188	10188/219395	unigene-1.0/unigene-100016.0/unigene-100033.0/unigene-100052.0/unigene-100135.0/unigene-100135.1/unigene-100138.0/unigene-100139.0/unigene-1002.0/unigene-100382.0/unigene-100427.2/unigene-100441.0/unigene-100477.0/unigene-100515.0/unigene-100561.0/unigene-100570.0/unigene-100594.0/unigene-100611.0/unigene-100688.0/unigene-100722.0/unigene-100729.0/unigene-100755.0/unigene-100856.0/unigene-100987.…
Biological process	GO:0048519	negative regulation of biological process	9763	9763/219395	unigene-1.0/unigene-100030.0/unigene-100044.0/unigene-100046.0/unigene-100054.0/unigene-100072.0/unigene-100115.0/unigene-100184.0/unigene-100184.1/unigene-100228.0/unigene-100245.0/unigene-100245.2/unigene-100285.1/unigene-100324.0/unigene-100367.0/unigene-100371.0/unigene-100382.0/unigene-100440.0/unigene-100458.0/unigene-100722.0/unigene-100770.0/unigene-100863.0/unigene-100940.0/unigene-10095…
Biological process	GO:0040007	growth	5545	5545/219395	unigene-100090.0/unigene-100304.0/unigene-100397.0/unigene-10043.0/unigene-100440.0/unigene-100479.0/unigene-100590.0/unigene-100591.0/unigene-100592.0/unigene-100593.0/unigene-100611.0/unigene-100704.0/unigene-100722.0/unigene-100940.0/unigene-10095.0/unigene-101118.0/unigene-101257.0/unigene-101464.0/unigene-10148.0/unigene-101543.0/unigene-101546.0/unigene-101774.0/unigene-102033.0/unigene-102…
Biological process	GO:0002376	immune system process	4935	4935/219395	unigene-100027.0/unigene-100130.0/unigene-100133.0/unigene-100134.0/unigene-100156.0/unigene-100157.0/unigene-100161.0/unigene-100190.0/unigene-100316.0/unigene-100351.0/unigene-10038.0/unigene-100446.1/unigene-100722.0/unigene-100741.0/unigene-100857.0/unigene-100890.0/unigene-100891.0/unigene-101010.0/unigene-101037.0/unigene-101051.0/unigene-101257.0/unigene-101313.0/unigene-101857.0/unigene-1…
Biological process	GO:0048511	rhythmic process	1757	1757/219395	unigene-100704.0/unigene-101086.0/unigene-101515.0/unigene-101515.2/unigene-101516.0/unigene-102855.0/unigene-102960.0/unigene-103244.0/unigene-103353.0/unigene-103895.0/unigene-103969.3/unigene-104136.1/unigene-104553.0/unigene-105087.0/unigene-10517.0/unigene-105425.0/unigene-105537.0/unigene-10674.0/unigene-107101.0/unigene-107430.0/unigene-107430.1/unigene-107430.2/unigene-107430.3/unigene-10…
Biological process	GO:0008283	cell proliferation	783	783/219395	unigene-1.0/unigene-100382.0/unigene-101579.0/unigene-102180.0/unigene-102581.0/unigene-103037.0/unigene-103066.0/unigene-104698.1/unigene-104698.2/unigene-106334.0/unigene-10647.0/unigene-106536.0/unigene-107107.0/unigene-107143.0/unigene-107295.0/unigene-107295.1/unigene-107295.2/unigene-10773.0/unigene-108016.0/unigene-10809.0/unigene-108227.1/unigene-108277.0/unigene-108553.0/unigene-109132.0…
Biological process	GO:0098754	detoxification	520	520/219395	unigene-102488.0/unigene-104315.0/unigene-10453.0/unigene-105235.0/unigene-105235.1/unigene-107069.0/unigene-108052.0/unigene-108374.0/unigene-109734.0/unigene-10975.0/unigene-10996.0/unigene-110484.0/unigene-110488.1/unigene-111028.0/unigene-113527.0/unigene-113527.1/unigene-113580.0/unigene-115535.0/unigene-115535.1/unigene-116022.1/unigene-116199.0/unigene-11829.0/unigene-12204.0/unigene-13894…
Biological process	GO:0040011	locomotion	332	332/219395	unigene-0.0/unigene-102044.0/unigene-102600.0/unigene-103452.0/unigene-106418.0/unigene-108823.0/unigene-110010.0/unigene-113104.0/unigene-13367.0/unigene-15740.0/unigene-17665.0/unigene-21666.103476/unigene-21666.103477/unigene-21666.103478/unigene-21666.105661/unigene-21666.105751/unigene-21666.105752/unigene-21666.107587/unigene-21666.107624/unigene-21666.107626/unigene-21666.107630/unigene-21…
Biological process	GO:0022610	biological adhesion	200	200/219395	unigene-1043.0/unigene-104511.0/unigene-10745.0/unigene-113328.0/unigene-115167.0/unigene-115281.0/unigene-115807.0/unigene-115825.1/unigene-15305.0/unigene-18012.0/unigene-19796.0/unigene-1987.0/unigene-21229.0/unigene-21666.104871/unigene-21666.113607/unigene-21666.118506/unigene-21666.118507/unigene-21666.119707/unigene-21666.121400/unigene-21666.121961/unigene-21666.127699/unigene-21666.13050…
Biological process	GO:0019740	nitrogen utilization	149	149/219395	unigene-106394.0/unigene-115867.4/unigene-21666.105002/unigene-21666.105125/unigene-21666.111066/unigene-21666.114612/unigene-21666.115116/unigene-21666.119181/unigene-21666.120155/unigene-21666.120804/unigene-21666.122830/unigene-21666.123977/unigene-21666.124451/unigene-21666.125807/unigene-21666.126068/unigene-21666.128832/unigene-21666.130229/unigene-21666.130264/unigene-21666.130265/unigene-…
Biological process	GO:0015976	carbon utilization	130	130/219395	unigene-100382.0/unigene-105264.0/unigene-109700.0/unigene-114144.0/unigene-114547.0/unigene-114926.0/unigene-11876.0/unigene-14702.0/unigene-17112.0/unigene-19414.0/unigene-21666.114028/unigene-21666.114029/unigene-21666.115066/unigene-21666.115097/unigene-21666.116581/unigene-21666.117779/unigene-21666.118615/unigene-21666.118617/unigene-21666.123549/unigene-21666.129321/unigene-21666.129322/un…
Biological process	GO:0043473	pigmentation	55	55/219395	unigene-106577.0/unigene-21666.106873/unigene-21666.110471/unigene-21666.116092/unigene-21666.116094/unigene-21666.123486/unigene-21666.123846/unigene-21666.153766/unigene-21666.159274/unigene-21666.165672/unigene-21666.165673/unigene-21666.196820/unigene-21666.212623/unigene-21666.213868/unigene-21666.213869/unigene-21666.213870/unigene-21666.213871/unigene-21666.213872/unigene-21666.213873/unig…
Biological process	GO:0001906	cell killing	42	42/219395	unigene-108928.0/unigene-115674.0/unigene-16792.0/unigene-21666.106042/unigene-21666.125139/unigene-21666.129840/unigene-21666.131496/unigene-21666.134674/unigene-21666.135366/unigene-21666.139189/unigene-21666.146064/unigene-21666.146254/unigene-21666.146730/unigene-21666.146732/unigene-21666.150327/unigene-21666.151984/unigene-21666.154501/unigene-21666.158720/unigene-21666.167011/unigene-21666…
Biological process	GO:0007610	behavior	14	14/219395	unigene-104882.1/unigene-21666.138155/unigene-21666.156317/unigene-21666.181814/unigene-21666.18786/unigene-21666.188556/unigene-21666.213516/unigene-21666.48546/unigene-21666.55691/unigene-21666.61282/unigene-21666.6206/unigene-21666.70338/unigene-21666.86003/unigene-74819.0
Biological process	GO:0006791	sulfur utilization	1	1/219395	unigene-8972.0
Cellular component	GO:0005623	cell	150033	150033/219395	unigene-0.0/unigene-1.0/unigene-10.0/unigene-100005.0/unigene-100005.1/unigene-100012.0/unigene-100016.0/unigene-10002.0/unigene-100027.0/unigene-100028.0/unigene-100030.0/unigene-100032.0/unigene-10004.0/unigene-100044.0/unigene-100045.0/unigene-100046.0/unigene-10005.0/unigene-100050.0/unigene-100052.0/unigene-100053.0/unigene-100054.0/unigene-100062.0/unigene-100064.0/unigene-100065.0/unigene-…
Cellular component	GO:0044464	cell part	149686	149686/219395	unigene-0.0/unigene-1.0/unigene-10.0/unigene-100005.0/unigene-100005.1/unigene-100012.0/unigene-100016.0/unigene-10002.0/unigene-100027.0/unigene-100028.0/unigene-100030.0/unigene-100032.0/unigene-10004.0/unigene-100044.0/unigene-100045.0/unigene-100046.0/unigene-10005.0/unigene-100050.0/unigene-100052.0/unigene-100053.0/unigene-100054.0/unigene-100062.0/unigene-100064.0/unigene-100065.0/unigene-…
Cellular component	GO:0043226	organelle	116599	116599/219395	unigene-0.0/unigene-1.0/unigene-10.0/unigene-100005.0/unigene-100005.1/unigene-100016.0/unigene-10002.0/unigene-100028.0/unigene-100030.0/unigene-100032.0/unigene-10004.0/unigene-100044.0/unigene-100045.0/unigene-100046.0/unigene-10005.0/unigene-100050.0/unigene-100052.0/unigene-100053.0/unigene-100054.0/unigene-100062.0/unigene-100064.0/unigene-100065.0/unigene-100069.0/unigene-100070.0/unigene-…
Cellular component	GO:0016020	membrane	74576	74576/219395	unigene-100001.0/unigene-100007.0/unigene-100014.0/unigene-100015.0/unigene-100021.0/unigene-100023.0/unigene-100027.0/unigene-100028.0/unigene-100038.0/unigene-100043.0/unigene-100045.0/unigene-10005.0/unigene-100064.0/unigene-100065.0/unigene-100094.0/unigene-100096.0/unigene-100107.0/unigene-100114.0/unigene-100124.0/unigene-100127.0/unigene-100130.0/unigene-100133.0/unigene-100134.0/unigene-1…
Cellular component	GO:0044425	membrane part	56020	56020/219395	unigene-100001.0/unigene-100007.0/unigene-100014.0/unigene-100015.0/unigene-100021.0/unigene-100023.0/unigene-100027.0/unigene-100028.0/unigene-100038.0/unigene-100043.0/unigene-100094.0/unigene-100096.0/unigene-100107.0/unigene-100124.0/unigene-100127.0/unigene-100133.0/unigene-100146.0/unigene-100185.0/unigene-100196.0/unigene-100197.0/unigene-100198.0/unigene-100199.0/unigene-10021.0/unigene-1…
Cellular component	GO:0044422	organelle part	55959	55959/219395	unigene-1.0/unigene-10.0/unigene-100016.0/unigene-100028.0/unigene-100045.0/unigene-10005.0/unigene-100054.0/unigene-100064.0/unigene-100065.0/unigene-100094.0/unigene-100097.0/unigene-100098.0/unigene-100107.0/unigene-100114.0/unigene-100124.0/unigene-100144.0/unigene-100146.0/unigene-100149.0/unigene-100153.0/unigene-100154.0/unigene-100156.0/unigene-100157.0/unigene-10016.0/unigene-100187.0/un…
Cellular component	GO:0032991	protein-containing complex	31985	31985/219395	unigene-1.0/unigene-10.0/unigene-10002.0/unigene-100030.0/unigene-10005.0/unigene-100062.0/unigene-100070.0/unigene-100090.0/unigene-100097.0/unigene-100098.0/unigene-100102.0/unigene-100103.0/unigene-100104.0/unigene-100105.0/unigene-100107.0/unigene-100115.0/unigene-100124.0/unigene-100144.0/unigene-100153.0/unigene-100154.0/unigene-100187.0/unigene-100202.0/unigene-10021.0/unigene-10021.1/unig…
Cellular component	GO:0031974	membrane-enclosed lumen	13421	13421/219395	unigene-1.0/unigene-10005.0/unigene-100054.0/unigene-100144.0/unigene-100149.0/unigene-100156.0/unigene-100157.0/unigene-10016.0/unigene-100190.0/unigene-100232.0/unigene-100255.0/unigene-10031.0/unigene-100311.0/unigene-100324.0/unigene-10037.0/unigene-10037.1/unigene-10037.2/unigene-10037.3/unigene-10037.4/unigene-100382.0/unigene-100393.0/unigene-100400.0/unigene-100506.0/unigene-100515.0/unig…
Cellular component	GO:0030054	cell junction	6662	6662/219395	unigene-100016.0/unigene-10005.0/unigene-100221.0/unigene-100318.0/unigene-100320.0/unigene-10037.0/unigene-10037.1/unigene-10037.2/unigene-10037.3/unigene-10037.4/unigene-100452.0/unigene-100503.0/unigene-100515.0/unigene-100652.0/unigene-100675.0/unigene-100861.0/unigene-100925.0/unigene-100926.0/unigene-10095.0/unigene-100987.0/unigene-100988.0/unigene-101010.0/unigene-101153.0/unigene-101153.…
Cellular component	GO:0055044	symplast	6658	6658/219395	unigene-100016.0/unigene-10005.0/unigene-100221.0/unigene-100318.0/unigene-100320.0/unigene-10037.0/unigene-10037.1/unigene-10037.2/unigene-10037.3/unigene-10037.4/unigene-100452.0/unigene-100503.0/unigene-100515.0/unigene-100652.0/unigene-100675.0/unigene-100861.0/unigene-100925.0/unigene-100926.0/unigene-10095.0/unigene-100987.0/unigene-100988.0/unigene-101010.0/unigene-101153.0/unigene-101153.…
Cellular component	GO:0005576	extracellular region	5275	5275/219395	unigene-100012.0/unigene-100016.0/unigene-10004.0/unigene-10012.0/unigene-100351.0/unigene-100397.0/unigene-100427.2/unigene-100503.0/unigene-100580.0/unigene-100582.0/unigene-100583.0/unigene-100584.0/unigene-100619.0/unigene-100629.0/unigene-100631.0/unigene-100741.0/unigene-100771.0/unigene-100882.0/unigene-100925.0/unigene-100926.0/unigene-101017.0/unigene-101153.0/unigene-101153.1/unigene-10…
Cellular component	GO:0099080	supramolecular complex	2388	2388/219395	unigene-10.0/unigene-100383.0/unigene-100397.0/unigene-100424.0/unigene-100450.0/unigene-100451.0/unigene-100805.0/unigene-100976.0/unigene-101345.0/unigene-10167.0/unigene-101790.0/unigene-101790.1/unigene-101803.0/unigene-101858.0/unigene-101880.1/unigene-102076.0/unigene-102139.0/unigene-102184.0/unigene-102297.0/unigene-102420.0/unigene-102511.0/unigene-102511.1/unigene-102512.0/unigene-10251…
Cellular component	GO:0044421	extracellular region part	613	613/219395	unigene-101263.0/unigene-101265.0/unigene-102010.0/unigene-102811.0/unigene-103292.0/unigene-103802.0/unigene-104439.0/unigene-104648.0/unigene-105644.0/unigene-107886.1/unigene-108364.0/unigene-108574.0/unigene-108574.1/unigene-108574.2/unigene-108676.0/unigene-108724.0/unigene-108732.0/unigene-108854.0/unigene-109487.0/unigene-110240.0/unigene-110964.0/unigene-111089.0/unigene-111851.0/unigene-…
Cellular component	GO:0009295	nucleoid	289	289/219395	unigene-100594.0/unigene-10185.0/unigene-102431.0/unigene-105522.1/unigene-105522.2/unigene-105522.3/unigene-106663.0/unigene-109186.0/unigene-111119.0/unigene-11135.0/unigene-111680.0/unigene-114077.0/unigene-11430.0/unigene-13468.0/unigene-152.0/unigene-16428.1/unigene-16580.0/unigene-21666.100623/unigene-21666.102887/unigene-21666.103237/unigene-21666.103241/unigene-21666.105136/unigene-21666.…
Cellular component	GO:0019012	virion	15	15/219395	unigene-103350.0/unigene-21666.12352/unigene-21666.144517/unigene-21666.175172/unigene-21666.197475/unigene-21666.218808/unigene-21666.47734/unigene-21666.47736/unigene-21666.5706/unigene-39557.0/unigene-42095.0/unigene-55751.0/unigene-56839.0/unigene-60421.0/unigene-91820.0
Cellular component	GO:0044215	other organism	15	15/219395	unigene-21666.196649/unigene-21666.21744/unigene-21666.46437/unigene-21666.48617/unigene-21666.5031/unigene-21666.5032/unigene-21666.5033/unigene-25080.0/unigene-40774.0/unigene-47446.0/unigene-59361.0/unigene-67620.0/unigene-72782.0/unigene-76691.0/unigene-9784.0
Cellular component	GO:0044217	other organism part	15	15/219395	unigene-21666.196649/unigene-21666.21744/unigene-21666.46437/unigene-21666.48617/unigene-21666.5031/unigene-21666.5032/unigene-21666.5033/unigene-25080.0/unigene-40774.0/unigene-47446.0/unigene-59361.0/unigene-67620.0/unigene-72782.0/unigene-76691.0/unigene-9784.0
Cellular component	GO:0044423	virion part	15	15/219395	unigene-103350.0/unigene-21666.12352/unigene-21666.144517/unigene-21666.175172/unigene-21666.197475/unigene-21666.218808/unigene-21666.47734/unigene-21666.47736/unigene-21666.5706/unigene-39557.0/unigene-42095.0/unigene-55751.0/unigene-56839.0/unigene-60421.0/unigene-91820.0
Molecular function	GO:0005488	binding	135162	135162/219395	unigene-0.0/unigene-10.0/unigene-100015.0/unigene-100016.0/unigene-10002.0/unigene-100030.0/unigene-100032.0/unigene-100039.0/unigene-100040.0/unigene-100043.0/unigene-100044.0/unigene-100045.0/unigene-100046.0/unigene-10005.0/unigene-100052.0/unigene-100053.0/unigene-100054.0/unigene-100067.0/unigene-100069.0/unigene-100070.0/unigene-100072.0/unigene-100076.0/unigene-10008.0/unigene-100087.0/uni…
Molecular function	GO:0003824	catalytic activity	108369	108369/219395	unigene-100005.0/unigene-100005.1/unigene-100012.0/unigene-100014.0/unigene-100015.0/unigene-100016.0/unigene-100021.0/unigene-100028.0/unigene-10004.0/unigene-100043.0/unigene-100044.0/unigene-100045.0/unigene-100046.0/unigene-100053.0/unigene-100064.0/unigene-100065.0/unigene-100067.0/unigene-100069.0/unigene-100076.0/unigene-100079.0/unigene-10008.0/unigene-100080.0/unigene-100085.0/unigene-10…
Molecular function	GO:0005215	transporter activity	13305	13305/219395	unigene-100023.0/unigene-100027.0/unigene-100096.0/unigene-100107.0/unigene-100124.0/unigene-100199.0/unigene-10021.0/unigene-10021.1/unigene-10021.2/unigene-10022.0/unigene-100221.0/unigene-100223.0/unigene-100239.0/unigene-100240.0/unigene-100243.0/unigene-10026.0/unigene-100284.0/unigene-100284.1/unigene-100415.0/unigene-100455.0/unigene-100468.1/unigene-100468.2/unigene-100471.0/unigene-10055…
Molecular function	GO:0140110	transcription regulator activity	9940	9940/219395	unigene-100032.0/unigene-100052.0/unigene-100072.0/unigene-100138.0/unigene-100139.0/unigene-1002.0/unigene-100285.1/unigene-100324.0/unigene-100441.0/unigene-100561.0/unigene-100590.0/unigene-100591.0/unigene-100592.0/unigene-100593.0/unigene-100618.0/unigene-100669.0/unigene-100699.0/unigene-100704.0/unigene-100729.0/unigene-100755.0/unigene-100863.0/unigene-100954.0/unigene-100955.0/unigene-10…
Molecular function	GO:0005198	structural molecule activity	7965	7965/219395	unigene-10002.0/unigene-10005.0/unigene-100062.0/unigene-100070.0/unigene-100097.0/unigene-100098.0/unigene-100102.0/unigene-100103.0/unigene-100104.0/unigene-100105.0/unigene-100187.0/unigene-100232.0/unigene-100271.0/unigene-100272.0/unigene-10031.0/unigene-100321.0/unigene-100322.0/unigene-100342.0/unigene-10037.0/unigene-10037.1/unigene-10037.2/unigene-10037.3/unigene-10037.4/unigene-100401.0…
Molecular function	GO:0060089	molecular transducer activity	3178	3178/219395	unigene-100316.0/unigene-100318.0/unigene-100320.0/unigene-101090.0/unigene-101169.0/unigene-101257.0/unigene-101310.0/unigene-101496.0/unigene-101856.0/unigene-10191.0/unigene-102035.0/unigene-102035.1/unigene-102035.2/unigene-102036.0/unigene-102036.1/unigene-102148.0/unigene-102157.0/unigene-102683.0/unigene-102683.1/unigene-102683.2/unigene-102939.0/unigene-103027.0/unigene-103027.1/unigene-1…
Molecular function	GO:0098772	molecular function regulator	3048	3048/219395	unigene-100054.0/unigene-100479.0/unigene-100688.0/unigene-100762.0/unigene-101042.0/unigene-101042.2/unigene-101074.0/unigene-101299.0/unigene-1013.0/unigene-101496.0/unigene-101808.0/unigene-102353.0/unigene-102377.0/unigene-102444.0/unigene-102445.0/unigene-102581.0/unigene-102583.0/unigene-102680.0/unigene-102731.0/unigene-102731.1/unigene-102911.0/unigene-102982.0/unigene-103029.0/unigene-10…
Molecular function	GO:0016209	antioxidant activity	1891	1891/219395	unigene-100713.0/unigene-100714.0/unigene-100753.0/unigene-100833.0/unigene-101108.0/unigene-101153.0/unigene-101153.1/unigene-101197.0/unigene-101313.0/unigene-101392.0/unigene-101393.0/unigene-101394.0/unigene-101395.0/unigene-101411.0/unigene-101692.0/unigene-101781.0/unigene-101781.1/unigene-101782.0/unigene-101867.0/unigene-101868.0/unigene-101868.1/unigene-101908.0/unigene-101986.0/unigene-…
Molecular function	GO:0140104	molecular carrier activity	242	242/219395	unigene-101006.0/unigene-103460.0/unigene-104956.0/unigene-104956.1/unigene-104956.2/unigene-105262.0/unigene-107554.0/unigene-108013.0/unigene-109047.0/unigene-110593.0/unigene-115188.0/unigene-115403.0/unigene-14087.0/unigene-14567.0/unigene-16865.0/unigene-1711.0/unigene-18455.0/unigene-19108.0/unigene-2087.0/unigene-21666.10473/unigene-21666.10474/unigene-21666.106931/unigene-21666.11585/unig…
Molecular function	GO:0045735	nutrient reservoir activity	189	189/219395	unigene-101223.0/unigene-101228.0/unigene-104859.0/unigene-104859.1/unigene-105022.0/unigene-105105.0/unigene-107059.0/unigene-107893.0/unigene-108168.0/unigene-110370.0/unigene-110990.0/unigene-114284.0/unigene-114541.0/unigene-116186.0/unigene-13602.0/unigene-14452.0/unigene-15307.1/unigene-16068.0/unigene-1667.0/unigene-16850.0/unigene-16851.0/unigene-19336.0/unigene-19336.1/unigene-1969.0/uni…
Molecular function	GO:0031386	protein tag	53	53/219395	unigene-102254.0/unigene-102254.2/unigene-21346.0/unigene-21666.100399/unigene-21666.100400/unigene-21666.100401/unigene-21666.100402/unigene-21666.100404/unigene-21666.114684/unigene-21666.114686/unigene-21666.116377/unigene-21666.116565/unigene-21666.116579/unigene-21666.122307/unigene-21666.124561/unigene-21666.131340/unigene-21666.131506/unigene-21666.132765/unigene-21666.139635/unigene-21666…
Molecular function	GO:0090729	toxin activity	36	36/219395	unigene-21666.106042/unigene-21666.119274/unigene-21666.125139/unigene-21666.129840/unigene-21666.131496/unigene-21666.134674/unigene-21666.139188/unigene-21666.139189/unigene-21666.146064/unigene-21666.146254/unigene-21666.146730/unigene-21666.146732/unigene-21666.150327/unigene-21666.151984/unigene-21666.152976/unigene-21666.154501/unigene-21666.158720/unigene-21666.167011/unigene-21666.169945/…
Molecular function	GO:0045182	translation regulator activity	16	16/219395	unigene-108814.0/unigene-21666.127888/unigene-21666.127889/unigene-21666.14271/unigene-21666.161857/unigene-21666.166311/unigene-21666.182623/unigene-21666.182624/unigene-21666.182626/unigene-21666.190139/unigene-21666.200319/unigene-67054.0/unigene-73747.0/unigene-84509.0/unigene-96466.0/unigene-97363.0
