# Supplementary material for: RNA-seq and phytohormone analysis reveals the culm color variation of Bambusa oldhamii Munro
Source: PeerJ. 2022 Jan 13;10:e12796. doi: 10.7717/peerj.12796 (PMC8761368; doi:10.7717/peerj.12796)
Supplement: Supplemental Information 7 [file peerj-10-12796-s007.xlsx]

## Sheet: Sheet1
Classification	Code	CodeFunction	geneCount	geneList
POORLY CHARACTERIZED	R	General function prediction only	36258	unigene-100010.0,unigene-100030.0,unigene-100054.0,unigene-100076.0,unigene-10008.0,unigene-100085.0,unigene-100087.0,unigene-100089.0,unigene-100099.0,unigene-10010.0,unigene-100100.0,unigene-10011.0,unigene-100121.0,unigene-10014.0,unigene-100151.0,unigene-100177.0,unigene-100183.0,unigene-100184.0,unigene-100184.1,unigene-100202.0,unigene-100223.0,unigene-100225.0,unigene-100252.0,unigene-1002…
CELLULAR PROCESSES AND SIGNALING	O	Posttranslational modification, protein turnover, chaperones	17483	unigene-1.0,unigene-100005.0,unigene-100005.1,unigene-100028.0,unigene-100064.0,unigene-100065.0,unigene-10012.0,unigene-100136.0,unigene-100149.0,unigene-100150.0,unigene-100232.0,unigene-100235.0,unigene-100245.0,unigene-100245.2,unigene-100281.0,unigene-100300.0,unigene-10031.0,unigene-100332.0,unigene-100333.0,unigene-100387.0,unigene-100388.0,unigene-100389.0,unigene-10040.0,unigene-100400.0…
CELLULAR PROCESSES AND SIGNALING	T	Signal transduction mechanisms	16082	unigene-100027.0,unigene-100050.0,unigene-100130.0,unigene-100133.0,unigene-100134.0,unigene-100136.0,unigene-10015.0,unigene-100161.0,unigene-100165.0,unigene-10022.0,unigene-100229.0,unigene-100246.0,unigene-100247.0,unigene-100305.0,unigene-100316.0,unigene-100371.0,unigene-100377.0,unigene-10038.0,unigene-100413.0,unigene-100414.0,unigene-100479.0,unigene-100483.0,unigene-100609.0,unigene-100…
INFORMATION STORAGE AND PROCESSING	J	Translation, ribosomal structure and biogenesis	11502	unigene-10002.0,unigene-10005.0,unigene-100062.0,unigene-100070.0,unigene-100097.0,unigene-100098.0,unigene-100102.0,unigene-100103.0,unigene-100104.0,unigene-100105.0,unigene-100115.0,unigene-100187.0,unigene-100232.0,unigene-100271.0,unigene-100272.0,unigene-10031.0,unigene-100321.0,unigene-100322.0,unigene-100342.0,unigene-10037.0,unigene-10037.1,unigene-10037.2,unigene-10037.3,unigene-10037.4…
METABOLISM	C	Energy production and conversion	8274	unigene-100107.0,unigene-100124.0,unigene-10016.0,unigene-100183.0,unigene-100207.1,unigene-100253.0,unigene-100254.0,unigene-100255.0,unigene-100348.0,unigene-100406.0,unigene-100443.0,unigene-100449.0,unigene-100455.0,unigene-10050.0,unigene-100540.0,unigene-100545.0,unigene-100585.0,unigene-100668.0,unigene-100703.0,unigene-100760.0,unigene-100772.0,unigene-100773.0,unigene-10086.0,unigene-100…
INFORMATION STORAGE AND PROCESSING	K	Transcription	8261	unigene-100241.0,unigene-100241.1,unigene-100382.0,unigene-100441.0,unigene-100475.0,unigene-100561.0,unigene-100570.0,unigene-100688.0,unigene-100698.0,unigene-100755.0,unigene-100946.0,unigene-100946.3,unigene-101029.0,unigene-101067.0,unigene-101073.0,unigene-101097.0,unigene-101098.0,unigene-101099.0,unigene-101308.0,unigene-101308.1,unigene-10157.0,unigene-101571.0,unigene-101661.0,unigene-1…
CELLULAR PROCESSES AND SIGNALING	U	Intracellular trafficking, secretion, and vesicular transport	8032	unigene-100028.0,unigene-100045.0,unigene-100323.0,unigene-10040.0,unigene-10043.0,unigene-100445.0,unigene-100506.0,unigene-100509.0,unigene-100510.0,unigene-10052.0,unigene-100610.0,unigene-100659.0,unigene-10070.0,unigene-100875.0,unigene-100876.0,unigene-10104.0,unigene-10105.0,unigene-101053.0,unigene-101056.0,unigene-101078.1,unigene-101113.0,unigene-10112.0,unigene-101122.0,unigene-101152.…
POORLY CHARACTERIZED	S	Function unknown	7972	unigene-100006.0,unigene-100021.0,unigene-100052.0,unigene-10006.0,unigene-100090.0,unigene-100196.0,unigene-100197.0,unigene-100198.0,unigene-10045.0,unigene-100507.0,unigene-100512.0,unigene-100513.0,unigene-100629.0,unigene-100741.0,unigene-100762.0,unigene-100903.0,unigene-100927.0,unigene-101134.0,unigene-101135.0,unigene-101150.0,unigene-101151.0,unigene-101151.1,unigene-101151.3,unigene-10…
METABOLISM	G	Carbohydrate transport and metabolism	7857	unigene-10004.0,unigene-100053.0,unigene-100067.0,unigene-100114.0,unigene-100186.0,unigene-100221.0,unigene-10028.0,unigene-100304.0,unigene-100310.0,unigene-100346.0,unigene-100406.0,unigene-100417.0,unigene-100427.0,unigene-100427.1,unigene-100427.2,unigene-100429.0,unigene-100433.0,unigene-100478.0,unigene-100503.0,unigene-100523.0,unigene-100526.0,unigene-100571.0,unigene-100573.0,unigene-10…
METABOLISM	I	Lipid transport and metabolism	6276	unigene-100016.0,unigene-100069.0,unigene-100106.0,unigene-100136.0,unigene-100165.0,unigene-100206.0,unigene-100209.0,unigene-100214.0,unigene-100289.0,unigene-100291.0,unigene-100404.0,unigene-100405.0,unigene-100422.0,unigene-100452.0,unigene-100463.0,unigene-10047.0,unigene-100549.0,unigene-100776.0,unigene-100790.0,unigene-100793.0,unigene-100794.0,unigene-100814.0,unigene-100923.0,unigene-1…
METABOLISM	E	Amino acid transport and metabolism	6133	unigene-100096.0,unigene-10012.0,unigene-100284.0,unigene-100284.1,unigene-100434.0,unigene-100580.0,unigene-100582.0,unigene-100583.0,unigene-100584.0,unigene-10059.0,unigene-100617.0,unigene-100617.1,unigene-10062.0,unigene-100657.0,unigene-100657.1,unigene-100657.2,unigene-100657.3,unigene-100657.4,unigene-100662.0,unigene-100663.0,unigene-100674.0,unigene-100730.0,unigene-100739.0,unigene-100…
INFORMATION STORAGE AND PROCESSING	A	RNA processing and modification	5903	unigene-100144.0,unigene-100228.0,unigene-100594.0,unigene-100887.0,unigene-100887.1,unigene-100887.2,unigene-100888.0,unigene-100940.0,unigene-100966.0,unigene-100967.0,unigene-101022.0,unigene-101024.0,unigene-101190.0,unigene-101322.0,unigene-101376.0,unigene-101429.0,unigene-101451.0,unigene-101452.0,unigene-10156.0,unigene-10169.0,unigene-101734.0,unigene-101772.0,unigene-102043.0,unigene-10…
METABOLISM	Q	Secondary metabolites biosynthesis, transport and catabolism	5101	unigene-100140.0,unigene-100141.0,unigene-100238.0,unigene-100240.0,unigene-10025.0,unigene-100266.0,unigene-100267.0,unigene-100268.0,unigene-100334.0,unigene-100395.0,unigene-100422.0,unigene-100499.0,unigene-10053.0,unigene-100599.0,unigene-10061.0,unigene-10066.0,unigene-10067.0,unigene-100713.0,unigene-100735.0,unigene-10083.0,unigene-100878.0,unigene-101112.0,unigene-101252.0,unigene-101253…
METABOLISM	P	Inorganic ion transport and metabolism	4010	unigene-100199.0,unigene-10022.0,unigene-100243.0,unigene-100415.0,unigene-100471.0,unigene-100556.0,unigene-100813.0,unigene-100979.0,unigene-101058.0,unigene-101077.0,unigene-101108.0,unigene-10111.0,unigene-101267.0,unigene-101313.0,unigene-101358.0,unigene-101371.0,unigene-101371.1,unigene-101372.0,unigene-101373.0,unigene-101374.0,unigene-101411.0,unigene-10152.0,unigene-101541.0,unigene-101…
INFORMATION STORAGE AND PROCESSING	L	Replication, recombination and repair	3845	unigene-100032.0,unigene-100044.0,unigene-100046.0,unigene-100092.0,unigene-100236.0,unigene-100237.0,unigene-100335.0,unigene-100384.0,unigene-10048.0,unigene-100553.0,unigene-100676.0,unigene-100830.0,unigene-10098.0,unigene-100984.0,unigene-100984.1,unigene-10099.0,unigene-101066.0,unigene-101177.0,unigene-10124.0,unigene-101266.0,unigene-101386.0,unigene-10143.0,unigene-101579.0,unigene-10168…
CELLULAR PROCESSES AND SIGNALING	Z	Cytoskeleton	3552	unigene-10.0,unigene-100397.0,unigene-100450.0,unigene-100451.0,unigene-100477.0,unigene-100519.0,unigene-100611.0,unigene-100770.0,unigene-100805.0,unigene-100846.0,unigene-100938.0,unigene-101343.0,unigene-101344.0,unigene-101626.0,unigene-101801.0,unigene-101803.0,unigene-101874.0,unigene-101982.0,unigene-102023.0,unigene-102076.0,unigene-102106.0,unigene-102114.1,unigene-102124.0,unigene-1021…
CELLULAR PROCESSES AND SIGNALING	D	Cell cycle control, cell division, chromosome partitioning	3529	unigene-1.0,unigene-100043.0,unigene-100458.0,unigene-100698.0,unigene-100966.0,unigene-101169.0,unigene-101343.0,unigene-101344.0,unigene-101402.0,unigene-101402.1,unigene-101454.0,unigene-101454.1,unigene-101803.0,unigene-101818.0,unigene-10210.0,unigene-102110.0,unigene-102110.1,unigene-102110.2,unigene-102111.0,unigene-102180.0,unigene-102294.0,unigene-10240.0,unigene-102405.0,unigene-102407.…
INFORMATION STORAGE AND PROCESSING	B	Chromatin structure and dynamics	2150	unigene-100153.0,unigene-100154.0,unigene-100382.0,unigene-101213.0,unigene-101214.0,unigene-101215.0,unigene-101579.0,unigene-101913.0,unigene-10213.0,unigene-102199.0,unigene-102202.0,unigene-102435.0,unigene-102562.0,unigene-102562.1,unigene-102562.2,unigene-102606.0,unigene-102854.0,unigene-103193.0,unigene-10320.0,unigene-103523.0,unigene-103795.0,unigene-103795.1,unigene-103849.1,unigene-10…
CELLULAR PROCESSES AND SIGNALING	M	Cell wall/membrane/envelope biogenesis	1807	unigene-100146.0,unigene-100281.0,unigene-100619.0,unigene-100684.0,unigene-101010.0,unigene-101165.0,unigene-101166.0,unigene-101167.0,unigene-102144.1,unigene-102237.0,unigene-102287.0,unigene-102287.1,unigene-102287.2,unigene-102422.0,unigene-10245.0,unigene-102597.0,unigene-10272.0,unigene-10337.0,unigene-103450.0,unigene-103777.0,unigene-10407.0,unigene-104085.0,unigene-104184.0,unigene-1043…
METABOLISM	H	Coenzyme transport and metabolism	1477	unigene-100163.0,unigene-100164.0,unigene-100585.0,unigene-100628.0,unigene-10078.0,unigene-100880.0,unigene-100915.0,unigene-101142.0,unigene-101142.1,unigene-101143.0,unigene-101148.0,unigene-101149.0,unigene-101292.0,unigene-101421.0,unigene-101446.0,unigene-101531.0,unigene-101675.0,unigene-103357.0,unigene-103414.0,unigene-103464.0,unigene-103543.0,unigene-103947.0,unigene-104188.0,unigene-1…
METABOLISM	F	Nucleotide transport and metabolism	1451	unigene-100094.0,unigene-100393.0,unigene-100424.0,unigene-100562.0,unigene-100562.1,unigene-100562.2,unigene-100718.0,unigene-100904.0,unigene-101218.0,unigene-101410.0,unigene-101413.0,unigene-101490.0,unigene-101644.0,unigene-102402.0,unigene-102485.0,unigene-102485.1,unigene-103192.0,unigene-103608.0,unigene-103779.0,unigene-103779.1,unigene-103906.0,unigene-104193.0,unigene-104287.0,unigene-…
CELLULAR PROCESSES AND SIGNALING	V	Defense mechanisms	1200	unigene-100086.0,unigene-100262.0,unigene-100600.0,unigene-100992.0,unigene-101341.0,unigene-102590.0,unigene-102590.1,unigene-103282.0,unigene-103353.0,unigene-104250.1,unigene-104553.0,unigene-104673.0,unigene-104675.0,unigene-105087.0,unigene-105141.0,unigene-105644.0,unigene-106457.0,unigene-106598.0,unigene-106991.0,unigene-107744.0,unigene-107847.1,unigene-107847.2,unigene-107847.4,unigene-…
CELLULAR PROCESSES AND SIGNALING	Y	Nuclear structure	574	unigene-100510.0,unigene-101078.1,unigene-104563.0,unigene-105262.0,unigene-105851.0,unigene-106159.0,unigene-10638.0,unigene-107824.0,unigene-108013.0,unigene-108368.0,unigene-109389.0,unigene-110650.0,unigene-110922.0,unigene-115725.0,unigene-117.0,unigene-11757.0,unigene-1186.0,unigene-15784.0,unigene-1684.0,unigene-1711.0,unigene-1861.0,unigene-2087.0,unigene-2125.0,unigene-2142.0,unigene-216…
CELLULAR PROCESSES AND SIGNALING	W	Extracellular structures	332	unigene-103777.0,unigene-104648.0,unigene-105031.0,unigene-106481.0,unigene-106880.0,unigene-107374.0,unigene-107374.1,unigene-107374.2,unigene-107664.0,unigene-108167.0,unigene-108167.1,unigene-108167.2,unigene-109205.0,unigene-109343.0,unigene-109956.0,unigene-111148.0,unigene-111640.0,unigene-112901.0,unigene-113328.0,unigene-114233.0,unigene-114657.0,unigene-115273.0,unigene-115273.1,unigene-…
CELLULAR PROCESSES AND SIGNALING	N	Cell motility	34	unigene-101858.0,unigene-21666.116695,unigene-21666.140734,unigene-21666.143726,unigene-21666.163898,unigene-21666.18817,unigene-21666.190077,unigene-21666.190185,unigene-21666.203576,unigene-21666.206303,unigene-21666.218901,unigene-21666.223759,unigene-21666.223760,unigene-21666.238729,unigene-21666.30982,unigene-21666.58031,unigene-21666.59027,unigene-21666.7081,unigene-21666.8297,unigene-2166…
