# Supplementary material for: RNA-seq and phytohormone analysis reveals the culm color variation of Bambusa oldhamii Munro
Source: PeerJ. 2022 Jan 13;10:e12796. doi: 10.7717/peerj.12796 (PMC8761368; doi:10.7717/peerj.12796)
Supplement: Supplemental Information 8 [file peerj-10-12796-s008.xlsx]

## Sheet: Sheet1
Pathway	Pathway_id	Gene_id	KEGG_ORTHOLOGY
Ribosome	ko03010	unigene-21666.119036;unigene-21666.122254;unigene-21666.156704;unigene-21666.156705;unigene-21666.156707;unigene-21666.157306;unigene-21666.1610;unigene-21666.196213;unigene-21666.207900;unigene-21666.227840;unigene-21666.238869;unigene-21666.248086;unigene-21666.248087;unigene-21666.26247;unigene-21666.60869;unigene-21666.84562;unigene-21666.84563;unigene-21666.90355;unigene-89352.0;unigene-1048…	K02863+K02864+K02865+K02866+K02867+K02868+K02870+K02871+K02872+K02873+K02874+K02875+K02876+K02877+K02878+K02879+K02880+K02881+K02882+K02883+K02884+K02885+K02886+K02887+K02888+K02889+K02890+K02891+K02892+K02893+K02894+K02895+K02896+K02897+K02898+K02899+K02900+K02901+K02902+K02903+K02904+K02905+K02906+K02907+K02908+K02909+K02910+K02911+K02912+K02913+K02914+K02915+K02916+K02917+K02918+K02919+K02920+…
Glyoxylate and dicarboxylate metabolism	ko00630	unigene-21666.110118;unigene-21666.110605;unigene-21666.119752;unigene-21666.136466;unigene-21666.162172;unigene-21666.164624;unigene-21666.164625;unigene-21666.213456;unigene-21666.218059;unigene-21666.26019;unigene-21666.93026;unigene-21666.93027;unigene-3049.0;unigene-64193.0;unigene-73682.0;unigene-103761.0;unigene-104483.0;unigene-10475.0;unigene-105276.0;unigene-107413.0;unigene-108078.0;un…	K00025+K00026+K00122+K00281+K00284+K00382+K00600+K00605+K00626+K00830+K01433+K01455+K01601+K01602+K01637+K01638+K01647+K01681+K01895+K01913+K01915+K02437+K03781+K11517+K14272+K15893+K15918+K15919+K18121+K19269+K22133
Metabolic pathways	ko01100	unigene-10067.0;unigene-100878.0;unigene-102866.0;unigene-108188.0;unigene-108493.0;unigene-110029.0;unigene-110866.0;unigene-114359.0;unigene-114735.1;unigene-11604.0;unigene-12155.0;unigene-12156.0;unigene-13053.0;unigene-16200.0;unigene-16200.1;unigene-20554.0;unigene-21666.100294;unigene-21666.103344;unigene-21666.105068;unigene-21666.116147;unigene-21666.118234;unigene-21666.120475;unigene-2…	K00001+K00002+K00008+K00012+K00013+K00016+K00020+K00021+K00025+K00026+K00028+K00029+K00030+K00031+K00033+K00036+K00051+K00052+K00053+K00058+K00059+K00074+K00083+K00088+K00099+K00102+K00103+K00106+K00108+K00109+K00121+K00122+K00128+K00130+K00131+K00133+K00134+K00140+K00145+K00161+K00162+K00164+K00166+K00167+K00207+K00208+K00213+K00215+K00218+K00222+K00225+K00227+K00228+K00231+K00232+K00234+K00235+…
Biosynthesis of secondary metabolites	ko01110	unigene-10067.0;unigene-100878.0;unigene-102866.0;unigene-108188.0;unigene-108493.0;unigene-110029.0;unigene-110866.0;unigene-114359.0;unigene-114735.1;unigene-11604.0;unigene-12155.0;unigene-12156.0;unigene-13053.0;unigene-16200.0;unigene-16200.1;unigene-20554.0;unigene-21666.100294;unigene-21666.103344;unigene-21666.105068;unigene-21666.116147;unigene-21666.118234;unigene-21666.120475;unigene-2…	K00001+K00002+K00006+K00013+K00016+K00021+K00025+K00026+K00030+K00031+K00033+K00036+K00052+K00053+K00083+K00088+K00099+K00106+K00111+K00121+K00128+K00133+K00134+K00145+K00161+K00162+K00164+K00166+K00167+K00213+K00215+K00218+K00222+K00224+K00225+K00227+K00228+K00231+K00232+K00234+K00235+K00236+K00249+K00264+K00276+K00281+K00286+K00318+K00382+K00422+K00430+K00454+K00475+K00487+K00511+K00514+K00547+…
Oxidative phosphorylation	ko00190	unigene-103089.0;unigene-105333.0;unigene-10751.0;unigene-107573.1;unigene-111521.0;unigene-111521.1;unigene-111521.2;unigene-111521.3;unigene-111521.4;unigene-111521.5;unigene-112848.0;unigene-112848.1;unigene-11529.0;unigene-115921.0;unigene-116122.0;unigene-116122.2;unigene-18134.0;unigene-21377.0;unigene-21547.0;unigene-21666.105081;unigene-21666.105082;unigene-21666.105083;unigene-21666.1122…	K00234+K00235+K00236+K00411+K00412+K00413+K00416+K00417+K00419+K01507+K01535+K02108+K02109+K02111+K02112+K02113+K02114+K02115+K02126+K02128+K02132+K02133+K02134+K02135+K02136+K02137+K02138+K02140+K02144+K02145+K02146+K02147+K02148+K02149+K02150+K02151+K02152+K02153+K02154+K02155+K02256+K02257+K02258+K02259+K02260+K02261+K02262+K02265+K02266+K02267+K03661+K03878+K03879+K03880+K03883+K03934+K03935+…
Phenylpropanoid biosynthesis	ko00940	unigene-100140.0;unigene-100141.0;unigene-10066.0;unigene-10083.0;unigene-101701.0;unigene-101815.0;unigene-101846.0;unigene-102627.0;unigene-103067.0;unigene-10335.0;unigene-1035.0;unigene-103519.0;unigene-10439.0;unigene-104762.0;unigene-105247.0;unigene-105413.0;unigene-10575.0;unigene-106191.0;unigene-106349.0;unigene-106349.1;unigene-106366.0;unigene-106462.0;unigene-106462.1;unigene-106584.…	K00083+K00430+K00487+K00588+K01188+K01904+K05349+K05350+K09753+K09754+K09755+K10775+K11188+K12355+K13064+K13065+K18368
Carbon metabolism	ko01200	unigene-21666.110118;unigene-21666.110605;unigene-21666.119752;unigene-21666.136466;unigene-21666.162172;unigene-21666.164624;unigene-21666.164625;unigene-21666.213456;unigene-21666.218059;unigene-21666.26019;unigene-21666.93026;unigene-21666.93027;unigene-3049.0;unigene-64193.0;unigene-73682.0;unigene-103761.0;unigene-104483.0;unigene-10475.0;unigene-105276.0;unigene-107413.0;unigene-108078.0;un…	K00025+K00026+K00028+K00029+K00030+K00031+K00033+K00036+K00051+K00058+K00074+K00121+K00122+K00131+K00134+K00140+K00161+K00162+K00164+K00232+K00234+K00235+K00236+K00261+K00281+K00297+K00382+K00600+K00605+K00615+K00616+K00626+K00627+K00640+K00658+K00814+K00830+K00831+K00844+K00850+K00851+K00855+K00863+K00873+K00927+K00948+K01006+K01057+K01070+K01079+K01100+K01455+K01595+K01601+K01602+K01610+K01623+…
Glycolysis / Gluconeogenesis	ko00010	unigene-10067.0;unigene-100878.0;unigene-102866.0;unigene-108188.0;unigene-108493.0;unigene-110029.0;unigene-110866.0;unigene-114359.0;unigene-114735.1;unigene-11604.0;unigene-12155.0;unigene-12156.0;unigene-13053.0;unigene-16200.0;unigene-16200.1;unigene-20554.0;unigene-21666.100294;unigene-21666.103344;unigene-21666.105068;unigene-21666.116147;unigene-21666.118234;unigene-21666.120475;unigene-2…	K00001+K00002+K00016+K00121+K00128+K00131+K00134+K00161+K00162+K00382+K00627+K00844+K00850+K00873+K00895+K00927+K01568+K01610+K01623+K01689+K01785+K01792+K01803+K01810+K01834+K01835+K01895+K01913+K03103+K03841+K14085+K15633+K15634+K18857
MAPK signaling pathway - plant	ko04016	unigene-100562.0;unigene-100562.1;unigene-100562.2;unigene-101218.0;unigene-101410.0;unigene-108699.0;unigene-110616.0;unigene-111379.0;unigene-111379.1;unigene-111509.0;unigene-115413.0;unigene-115413.1;unigene-115413.2;unigene-115624.0;unigene-115624.1;unigene-11987.0;unigene-11988.0;unigene-14642.0;unigene-16628.0;unigene-16931.0;unigene-18474.0;unigene-21666.110443;unigene-21666.112415;unigen…	K00940+K02183+K03781+K13413+K13414+K13420+K13422+K13424+K13425+K13447+K13449+K14496+K14497+K14498+K14509+K14510+K14512+K14513+K14514+K14515+K14516+K17686+K20535+K20536+K20538+K20547+K20553+K20557+K20558+K20600+K20603+K20604+K20606+K20607+K20714+K20717+K20718+K20725+K20726+K20772
Biosynthesis of amino acids	ko01230	unigene-10721.0;unigene-21666.100453;unigene-21666.100972;unigene-21666.100973;unigene-21666.100974;unigene-21666.109027;unigene-21666.109028;unigene-21666.109029;unigene-21666.116449;unigene-21666.116450;unigene-21666.116451;unigene-21666.116452;unigene-21666.116453;unigene-21666.116454;unigene-21666.116455;unigene-21666.116456;unigene-21666.116457;unigene-21666.116458;unigene-21666.136080;unige…	K00013+K00030+K00031+K00052+K00053+K00058+K00133+K00134+K00145+K00215+K00264+K00286+K00549+K00600+K00611+K00615+K00616+K00620+K00640+K00765+K00766+K00789+K00800+K00811+K00814+K00815+K00817+K00818+K00826+K00831+K00850+K00872+K00873+K00891+K00927+K00928+K00930+K00948+K01079+K01438+K01476+K01586+K01609+K01620+K01623+K01626+K01647+K01649+K01652+K01653+K01657+K01658+K01663+K01681+K01687+K01689+K01693+…
Pyruvate metabolism	ko00620	unigene-101141.0;unigene-101141.1;unigene-101141.2;unigene-21666.133261;unigene-21666.134269;unigene-21666.134270;unigene-21666.134271;unigene-21666.140860;unigene-21666.15856;unigene-21666.175843;unigene-21666.178941;unigene-21666.195305;unigene-21666.228116;unigene-21666.239570;unigene-21666.250134;unigene-39229.0;unigene-96826.0;unigene-21666.110118;unigene-21666.110605;unigene-21666.119752;un…	K00016+K00025+K00026+K00028+K00029+K00051+K00102+K00128+K00161+K00162+K00382+K00626+K00627+K00873+K01006+K01069+K01512+K01595+K01610+K01638+K01649+K01679+K01759+K01895+K01913+K11262+K14085+K18881
Starch and sucrose metabolism	ko00500	unigene-100053.0;unigene-110507.1;unigene-112634.0;unigene-112634.1;unigene-20537.0;unigene-21666.108733;unigene-21666.111418;unigene-21666.151423;unigene-21666.201454;unigene-21666.208678;unigene-21666.208679;unigene-21666.208680;unigene-21666.210707;unigene-21666.221663;unigene-21666.221664;unigene-21666.226366;unigene-21666.226367;unigene-21666.226377;unigene-21666.241025;unigene-21666.53845;u…	K00688+K00695+K00696+K00700+K00703+K00705+K00844+K00847+K00963+K00975+K01087+K01176+K01177+K01179+K01187+K01188+K01193+K01194+K01214+K01810+K01835+K05349+K05350+K07024+K13679+K16055+K18447+K19891+K19892+K19893
Endocytosis	ko04144	unigene-104355.0;unigene-104572.0;unigene-105604.0;unigene-106386.0;unigene-107495.0;unigene-107495.1;unigene-107496.0;unigene-107497.0;unigene-110240.2;unigene-11039.0;unigene-113994.0;unigene-113994.1;unigene-11523.0;unigene-115392.1;unigene-12281.0;unigene-1239.0;unigene-14550.1;unigene-15520.0;unigene-18058.0;unigene-21666.105991;unigene-21666.10740;unigene-21666.128839;unigene-21666.13192;un…	K00889+K01115+K01528+K03283+K04646+K05754+K05755+K05756+K05757+K05758+K07889+K07897+K07901+K07904+K07937+K10364+K10365+K10591+K11824+K11826+K11827+K11866+K12183+K12184+K12185+K12188+K12189+K12190+K12191+K12192+K12193+K12194+K12195+K12196+K12197+K12198+K12199+K12200+K12471+K12479+K12483+K12486+K12489+K12492+K12493+K15053+K17917+K18442+K18443+K18463+K18464+K18465+K18466+K18467+K18468+K19366+K19367+…
Plant hormone signal transduction	ko04075	unigene-102033.1;unigene-115104.1;unigene-21666.104220;unigene-21666.136037;unigene-21666.189106;unigene-21666.190024;unigene-21666.214183;unigene-21666.214184;unigene-21666.242486;unigene-21666.33922;unigene-21666.34198;unigene-21666.34199;unigene-21666.34200;unigene-21666.34201;unigene-21666.34939;unigene-21666.38924;unigene-21666.4365;unigene-21666.4366;unigene-21666.4367;unigene-21666.4368;un…	K13413+K13415+K13422+K13449+K13463+K13464+K13946+K14431+K14432+K14484+K14485+K14486+K14487+K14488+K14489+K14490+K14491+K14492+K14493+K14494+K14496+K14497+K14498+K14499+K14500+K14502+K14503+K14505+K14506+K14508+K14509+K14510+K14512+K14513+K14514+K14515+K14516+K16189
RNA transport	ko03013	unigene-102996.0;unigene-102996.2;unigene-21666.100762;unigene-21666.1094;unigene-21666.1095;unigene-21666.156545;unigene-21666.156546;unigene-21666.161726;unigene-21666.161728;unigene-21666.161730;unigene-21666.161731;unigene-21666.165513;unigene-21666.165514;unigene-21666.168714;unigene-21666.17465;unigene-21666.184932;unigene-21666.198047;unigene-21666.198048;unigene-21666.209245;unigene-21666…	K00784+K02516+K03113+K03231+K03236+K03237+K03238+K03239+K03240+K03241+K03242+K03243+K03245+K03246+K03247+K03248+K03249+K03250+K03251+K03252+K03253+K03254+K03257+K03259+K03260+K03262+K03537+K03538+K03539+K03680+K03754+K05019+K05749+K07562+K07936+K09291+K10577+K12160+K12812+K12875+K12876+K12877+K12878+K12879+K12880+K12881+K12882+K12883+K13025+K13114+K13126+K13130+K13137+K13151+K13171+K13174+K13175+…
Protein processing in endoplasmic reticulum	ko04141	unigene-21666.111090;unigene-21666.111091;unigene-21666.113389;unigene-21666.113390;unigene-21666.127920;unigene-21666.130249;unigene-21666.132113;unigene-21666.132114;unigene-21666.132911;unigene-21666.138403;unigene-21666.143909;unigene-21666.143910;unigene-21666.152507;unigene-21666.152508;unigene-21666.159039;unigene-21666.159149;unigene-21666.166096;unigene-21666.170790;unigene-21666.180761;…	K01228+K01230+K01456+K03094+K03237+K03283+K03347+K03868+K04079+K04523+K04554+K05546+K06689+K07151+K07342+K07953+K08054+K08057+K08288+K08653+K08852+K09481+K09486+K09487+K09490+K09503+K09517+K09518+K09523+K09540+K09561+K09562+K09580+K09584+K10084+K10085+K10088+K10575+K10578+K10597+K10601+K10636+K10661+K10666+K10839+K10950+K10956+K11718+K11863+K12275+K12666+K12667+K12668+K12669+K12670+K13249+K13250+…
RNA degradation	ko03018	unigene-106263.0;unigene-115567.1;unigene-13753.0;unigene-16623.0;unigene-21666.100106;unigene-21666.116851;unigene-21666.116854;unigene-21666.120985;unigene-21666.123390;unigene-21666.124042;unigene-21666.124098;unigene-21666.143534;unigene-21666.146232;unigene-21666.149857;unigene-21666.149858;unigene-21666.149859;unigene-21666.149860;unigene-21666.149861;unigene-21666.154803;unigene-21666.1548…	K00850+K00962+K01148+K01689+K03514+K03654+K03678+K03679+K03681+K04043+K04077+K07573+K10643+K11600+K12580+K12581+K12585+K12586+K12587+K12589+K12590+K12591+K12592+K12593+K12598+K12599+K12600+K12602+K12603+K12604+K12605+K12606+K12607+K12608+K12611+K12613+K12614+K12616+K12617+K12619+K12620+K12621+K12622+K12623+K12624+K12625+K12626+K12627+K13126+K14442
Ubiquitin mediated proteolysis	ko04120	unigene-104609.0;unigene-106835.0;unigene-106835.1;unigene-106835.2;unigene-10722.0;unigene-10771.0;unigene-111171.0;unigene-112249.0;unigene-112851.0;unigene-11730.0;unigene-13129.0;unigene-15056.0;unigene-21666.106044;unigene-21666.119853;unigene-21666.119855;unigene-21666.119872;unigene-21666.119873;unigene-21666.119874;unigene-21666.119875;unigene-21666.119876;unigene-21666.119877;unigene-216…	K03094+K03178+K03347+K03348+K03349+K03350+K03351+K03352+K03353+K03354+K03355+K03357+K03358+K03363+K03364+K03868+K03869+K03872+K03875+K04506+K04554+K04649+K04706+K06688+K06689+K09561+K10140+K10143+K10144+K10570+K10571+K10573+K10575+K10576+K10577+K10578+K10579+K10580+K10581+K10583+K10588+K10589+K10590+K10591+K10592+K10597+K10598+K10599+K10601+K10609+K10610+K10684+K10685+K10686+K10688+K12456+K20217
Plant-pathogen interaction	ko04626	unigene-107186.0;unigene-16684.0;unigene-18999.0;unigene-20449.0;unigene-21666.100602;unigene-21666.104396;unigene-21666.104397;unigene-21666.104405;unigene-21666.104406;unigene-21666.159942;unigene-21666.201670;unigene-21666.57713;unigene-28483.0;unigene-31497.0;unigene-35433.3;unigene-35433.5;unigene-5134.0;unigene-60931.0;unigene-6099.0;unigene-6794.0;unigene-8063.0;unigene-87644.0;unigene-943…	K00864+K02183+K04079+K04368+K05391+K09487+K12795+K13412+K13413+K13414+K13420+K13424+K13425+K13427+K13429+K13430+K13436+K13437+K13447+K13448+K13449+K13456+K13457+K13458+K13459+K13473+K18835+K18875
Spliceosome	ko03040	unigene-100150.0;unigene-100839.0;unigene-101738.0;unigene-101742.0;unigene-101743.0;unigene-103311.0;unigene-103994.0;unigene-104640.0;unigene-104842.0;unigene-105156.0;unigene-105156.1;unigene-105156.2;unigene-105902.0;unigene-107840.0;unigene-110456.0;unigene-112247.1;unigene-112345.0;unigene-112435.0;unigene-112436.0;unigene-112674.0;unigene-112915.0;unigene-112915.1;unigene-112957.0;unigene-…	K03283+K06063+K09567+K10599+K11086+K11087+K11088+K11091+K11092+K11093+K11094+K11095+K11096+K11097+K11098+K11099+K11984+K12621+K12622+K12623+K12624+K12625+K12626+K12627+K12662+K12733+K12741+K12811+K12812+K12813+K12815+K12816+K12817+K12818+K12819+K12820+K12821+K12822+K12823+K12824+K12825+K12826+K12827+K12828+K12829+K12830+K12831+K12832+K12833+K12834+K12835+K12836+K12837+K12839+K12840+K12842+K12843+…
mRNA surveillance pathway	ko03015	unigene-109231.0;unigene-111979.0;unigene-111979.1;unigene-111979.2;unigene-111979.4;unigene-21666.109415;unigene-21666.11332;unigene-21666.11625;unigene-21666.185119;unigene-21666.185120;unigene-21666.185124;unigene-21666.190875;unigene-21666.190876;unigene-21666.190878;unigene-21666.190879;unigene-21666.190880;unigene-21666.190881;unigene-21666.190882;unigene-21666.190883;unigene-21666.227245;u…	K00565+K03265+K03267+K03456+K04354+K04382+K06100+K06269+K06965+K08873+K11583+K11584+K12812+K12875+K12876+K12877+K12881+K12882+K12883+K13025+K13114+K13126+K13171+K13917+K14294+K14324+K14325+K14326+K14328+K14376+K14396+K14397+K14398+K14399+K14400+K14401+K14402+K14403+K14404+K14406+K14407+K14408+K14409+K14411+K14416+K14962+K15542+K15544
Carbon fixation in photosynthetic organisms	ko00710	unigene-21666.110118;unigene-21666.110605;unigene-21666.119752;unigene-21666.136466;unigene-21666.162172;unigene-21666.164624;unigene-21666.164625;unigene-21666.213456;unigene-21666.218059;unigene-21666.26019;unigene-21666.93026;unigene-21666.93027;unigene-3049.0;unigene-64193.0;unigene-73682.0;unigene-103761.0;unigene-104483.0;unigene-10475.0;unigene-105276.0;unigene-107413.0;unigene-108078.0;un…	K00025+K00026+K00028+K00029+K00051+K00134+K00615+K00814+K00855+K00927+K01006+K01100+K01595+K01601+K01602+K01610+K01623+K01783+K01803+K01807+K03841+K05298+K14272+K14454+K14455
Peroxisome	ko04146	unigene-100348.0;unigene-100916.0;unigene-101238.0;unigene-101238.1;unigene-101238.2;unigene-109605.0;unigene-109856.0;unigene-12041.0;unigene-12042.0;unigene-12043.0;unigene-13333.0;unigene-21666.111297;unigene-21666.117166;unigene-21666.117488;unigene-21666.124471;unigene-21666.137835;unigene-21666.148745;unigene-21666.148746;unigene-21666.148747;unigene-21666.148750;unigene-21666.148752;unigen…	K00031+K00106+K00232+K00306+K00477+K00830+K00869+K01578+K01640+K01897+K03426+K03781+K04564+K04565+K06664+K07513+K11147+K11517+K12261+K12663+K13237+K13335+K13336+K13337+K13338+K13339+K13341+K13342+K13343+K13344+K13345+K13346+K13347+K13348+K13354+K13356
Phagosome	ko04145	unigene-21666.1268;unigene-21666.199511;unigene-21666.199512;unigene-21666.199515;unigene-21666.199516;unigene-21666.199518;unigene-21666.199519;unigene-21666.205306;unigene-21666.205307;unigene-21666.241131;unigene-21666.241132;unigene-21666.32397;unigene-21666.3352;unigene-45583.0;unigene-83144.0;unigene-104239.0;unigene-104286.0;unigene-107037.0;unigene-107063.0;unigene-19269.0;unigene-21666.1…	K00914+K00921+K02144+K02145+K02146+K02147+K02148+K02149+K02150+K02151+K02152+K02153+K02154+K02155+K03661+K04392+K07342+K07374+K07375+K07889+K07897+K08054+K08057+K08492+K08517+K09481+K10956
Cysteine and methionine metabolism	ko00270	unigene-101141.0;unigene-101141.1;unigene-101141.2;unigene-21666.133261;unigene-21666.134269;unigene-21666.134270;unigene-21666.134271;unigene-21666.140860;unigene-21666.15856;unigene-21666.175843;unigene-21666.178941;unigene-21666.195305;unigene-21666.228116;unigene-21666.239570;unigene-21666.250134;unigene-39229.0;unigene-96826.0;unigene-21666.110118;unigene-21666.110605;unigene-21666.119752;un…	K00016+K00025+K00026+K00058+K00133+K00547+K00549+K00558+K00640+K00789+K00797+K00811+K00815+K00826+K00827+K00831+K00837+K00899+K00928+K01011+K01244+K01251+K01611+K01738+K01739+K01760+K01761+K01762+K01919+K05396+K05933+K08963+K08967+K12524+K13034+K14454+K14455+K16054+K17398+K20772+K21456+K22207
Glycerolipid metabolism	ko00561	unigene-100225.0;unigene-1009.0;unigene-103288.0;unigene-105046.0;unigene-105072.0;unigene-105194.0;unigene-105545.0;unigene-105582.0;unigene-105582.1;unigene-106572.0;unigene-107017.0;unigene-108084.1;unigene-108117.0;unigene-111216.0;unigene-111559.0;unigene-14911.0;unigene-16595.0;unigene-17151.0;unigene-17694.0;unigene-17695.0;unigene-18044.0;unigene-18318.0;unigene-19093.0;unigene-19656.0;un…	K00002+K00128+K00630+K00655+K00679+K00863+K00864+K00901+K01054+K03715+K06118+K06119+K07407+K09480+K11155+K13506+K13508+K13513+K13519+K13523+K14085+K14457+K14674+K15728+K15918+K18693+K21362+K22849+K22920
Amino sugar and nucleotide sugar metabolism	ko00520	unigene-101017.0;unigene-101826.1;unigene-101826.2;unigene-101826.3;unigene-103859.0;unigene-103859.1;unigene-103859.3;unigene-103859.4;unigene-103859.5;unigene-103859.6;unigene-103859.7;unigene-21666.34155;unigene-21666.45684;unigene-21666.63653;unigene-44945.0;unigene-5001.0;unigene-99671.0;unigene-100585.0;unigene-11526.0;unigene-14499.0;unigene-21666.10372;unigene-21666.11745;unigene-21666.12…	K00012+K00326+K00621+K00770+K00820+K00844+K00847+K00963+K00965+K00966+K00972+K00975+K01183+K01209+K01711+K01784+K01809+K01810+K01835+K01836+K02377+K05305+K06118+K08678+K08679+K10046+K12373+K12446+K12447+K12448+K12449+K12450+K12451+K13379+K13648+K15920+K16190+K17497+K18677+K20547
Fatty acid degradation	ko00071	unigene-10067.0;unigene-100878.0;unigene-102866.0;unigene-108188.0;unigene-108493.0;unigene-110029.0;unigene-110866.0;unigene-114359.0;unigene-114735.1;unigene-11604.0;unigene-12155.0;unigene-12156.0;unigene-13053.0;unigene-16200.0;unigene-16200.1;unigene-20554.0;unigene-21666.100294;unigene-21666.103344;unigene-21666.105068;unigene-21666.116147;unigene-21666.118234;unigene-21666.120475;unigene-2…	K00001+K00121+K00128+K00232+K00249+K00626+K01692+K01897+K07513+K07517+K10527+K14085+K15401+K18857+K20495
Purine metabolism	ko00230	unigene-14303.0;unigene-20107.0;unigene-20108.0;unigene-21666.189778;unigene-21666.249692;unigene-32665.0;unigene-36706.0;unigene-50752.0;unigene-63261.0;unigene-6630.0;unigene-72941.0;unigene-72941.1;unigene-72941.2;unigene-79296.1;unigene-21666.133787;unigene-21666.250326;unigene-86780.0;unigene-100266.0;unigene-100267.0;unigene-100268.0;unigene-104736.0;unigene-11794.0;unigene-13595.0;unigene-…	K00088+K00106+K00365+K00601+K00602+K00759+K00760+K00764+K00856+K00860+K00873+K00939+K00940+K00942+K00948+K00951+K01081+K01427+K01466+K01488+K01490+K01510+K01517+K01519+K01522+K01756+K01835+K01923+K01933+K01939+K01945+K01951+K01952+K02083+K03787+K06966+K10807+K10808+K11808+K13484+K13811+K14641+K14977+K18151+K18447+K18453+K18532
Cyanoamino acid metabolism	ko00460	unigene-102960.0;unigene-111976.0;unigene-111976.1;unigene-111976.2;unigene-111976.3;unigene-114553.0;unigene-115877.0;unigene-14435.0;unigene-21666.101458;unigene-21666.103592;unigene-21666.103595;unigene-21666.104662;unigene-21666.104668;unigene-21666.114121;unigene-21666.132403;unigene-21666.142184;unigene-21666.142423;unigene-21666.142424;unigene-21666.144634;unigene-21666.147438;unigene-2166…	K00600+K00681+K01188+K01455+K01501+K05349+K05350+K08248+K13029+K13034+K13035+K13051+K18592
Glutathione metabolism	ko00480	unigene-100348.0;unigene-100916.0;unigene-101238.0;unigene-101238.1;unigene-101238.2;unigene-109605.0;unigene-109856.0;unigene-12041.0;unigene-12042.0;unigene-12043.0;unigene-13333.0;unigene-21666.111297;unigene-21666.117166;unigene-21666.117488;unigene-21666.124471;unigene-21666.137835;unigene-21666.148745;unigene-21666.148746;unigene-21666.148747;unigene-21666.148750;unigene-21666.148752;unigen…	K00031+K00033+K00036+K00383+K00432+K00434+K00681+K00797+K00799+K01255+K01256+K01469+K01581+K01919+K07232+K10807+K10808+K18592+K21456+K21888+K22596
Tryptophan metabolism	ko00380	unigene-100253.0;unigene-100255.0;unigene-100904.0;unigene-101604.0;unigene-101936.0;unigene-101936.1;unigene-101936.2;unigene-101936.3;unigene-101936.4;unigene-101936.5;unigene-101936.6;unigene-101936.7;unigene-102947.0;unigene-103406.0;unigene-104354.0;unigene-105163.0;unigene-105267.0;unigene-105267.1;unigene-105267.2;unigene-105267.3;unigene-105267.4;unigene-105267.5;unigene-105503.0;unigene-…	K00128+K00382+K00626+K00658+K00837+K01426+K01501+K01593+K01692+K03781+K11816+K11817+K14085+K16903+K22450+K22588
Nitrogen metabolism	ko00910	unigene-112930.0;unigene-21666.148317;unigene-21666.157213;unigene-21666.162378;unigene-21666.17981;unigene-21666.180637;unigene-21666.180638;unigene-21666.180639;unigene-21666.180640;unigene-21666.180641;unigene-21666.180642;unigene-21666.180643;unigene-21666.216046;unigene-21666.216047;unigene-21666.244661;unigene-21666.249130;unigene-21666.81399;unigene-21666.81400;unigene-21666.81408;unigene-…	K00261+K00262+K00264+K00284+K00366+K01455+K01501+K01673+K01674+K01725+K01915+K02575+K10534
Fatty acid metabolism	ko01212	unigene-100085.0;unigene-104687.0;unigene-104766.0;unigene-104795.0;unigene-107070.0;unigene-109243.0;unigene-111099.0;unigene-111669.0;unigene-111880.1;unigene-112550.0;unigene-112650.0;unigene-112650.2;unigene-11292.0;unigene-112924.0;unigene-113017.0;unigene-113018.0;unigene-115639.0;unigene-116380.0;unigene-12110.0;unigene-12360.0;unigene-13399.0;unigene-13812.0;unigene-13942.0;unigene-15310.…	K00059+K00208+K00232+K00249+K00626+K00645+K00648+K01074+K01692+K01897+K02372+K03921+K07512+K07513+K09458+K10251+K10256+K10258+K10527+K10703+K10781+K11262+K18660
Glycerophospholipid metabolism	ko00564	unigene-108660.0;unigene-12078.0;unigene-13014.0;unigene-21666.100110;unigene-21666.115047;unigene-21666.16201;unigene-21666.16202;unigene-21666.187068;unigene-21666.187069;unigene-21666.206024;unigene-21666.229043;unigene-21911.0;unigene-21911.1;unigene-21911.2;unigene-26071.0;unigene-41052.0;unigene-45725.0;unigene-53698.0;unigene-54051.0;unigene-57611.0;unigene-90030.0;unigene-90031.0;unigene-…	K00006+K00111+K00550+K00630+K00655+K00894+K00901+K00967+K00968+K00981+K00993+K00995+K00999+K01047+K01094+K01114+K01115+K01126+K01517+K01613+K05929+K06124+K06129+K06130+K08730+K08744+K13506+K13508+K13510+K13511+K13513+K13519+K13523+K14156+K14674+K15728+K16818+K16860+K18693+K18696+K22389
Valine, leucine and isoleucine degradation	ko00280	unigene-13153.0;unigene-20464.0;unigene-21666.128571;unigene-21666.129811;unigene-21666.131523;unigene-21666.142969;unigene-21666.169817;unigene-21666.172283;unigene-21666.184470;unigene-21666.184472;unigene-21666.188756;unigene-21666.224964;unigene-21666.249229;unigene-21666.249230;unigene-21666.52641;unigene-21666.60651;unigene-21666.62510;unigene-21666.62511;unigene-21666.64935;unigene-21666.6…	K00020+K00128+K00140+K00166+K00167+K00249+K00253+K00382+K00626+K00826+K00827+K01640+K01641+K01692+K01968+K01969+K05605+K05607+K07513+K09699+K14085+K18660
Pentose phosphate pathway	ko00030	unigene-102534.0;unigene-106823.0;unigene-114610.0;unigene-14077.0;unigene-16314.0;unigene-16315.0;unigene-20424.0;unigene-21666.101121;unigene-21666.10865;unigene-21666.136057;unigene-21666.13613;unigene-21666.140656;unigene-21666.14088;unigene-21666.14089;unigene-21666.14090;unigene-21666.14091;unigene-21666.14092;unigene-21666.14093;unigene-21666.14094;unigene-21666.161888;unigene-21666.181220…	K00033+K00036+K00131+K00615+K00616+K00850+K00851+K00852+K00895+K00948+K01057+K01623+K01783+K01807+K01810+K01835+K03841
Citrate cycle (TCA cycle)	ko00020	unigene-21666.110118;unigene-21666.110605;unigene-21666.119752;unigene-21666.136466;unigene-21666.162172;unigene-21666.164624;unigene-21666.164625;unigene-21666.213456;unigene-21666.218059;unigene-21666.26019;unigene-21666.93026;unigene-21666.93027;unigene-3049.0;unigene-64193.0;unigene-73682.0;unigene-103761.0;unigene-104483.0;unigene-10475.0;unigene-105276.0;unigene-107413.0;unigene-108078.0;un…	K00025+K00026+K00030+K00031+K00161+K00162+K00164+K00234+K00235+K00236+K00382+K00627+K00658+K01610+K01647+K01648+K01679+K01681+K01899+K01900
Ribosome biogenesis in eukaryotes	ko03008	unigene-10582.0;unigene-110282.0;unigene-12090.0;unigene-21666.116838;unigene-21666.130814;unigene-21666.130815;unigene-21666.133293;unigene-21666.133294;unigene-21666.136458;unigene-21666.144949;unigene-21666.146924;unigene-21666.150362;unigene-21666.150363;unigene-21666.150364;unigene-21666.176368;unigene-21666.189013;unigene-21666.20037;unigene-21666.212157;unigene-21666.215850;unigene-21666.2…	K03097+K03115+K03264+K03537+K03538+K03539+K06943+K07178+K07179+K07562+K07936+K11108+K11128+K11129+K11130+K11131+K11883+K12619+K12845+K13288+K14290+K14521+K14525+K14536+K14537+K14538+K14539+K14544+K14545+K14546+K14548+K14549+K14550+K14552+K14553+K14554+K14555+K14556+K14557+K14558+K14559+K14560+K14561+K14563+K14564+K14565+K14566+K14567+K14568+K14569+K14570+K14571+K14572+K14573+K14574+K18532
Arginine and proline metabolism	ko00330	unigene-100253.0;unigene-100255.0;unigene-100904.0;unigene-101604.0;unigene-101936.0;unigene-101936.1;unigene-101936.2;unigene-101936.3;unigene-101936.4;unigene-101936.5;unigene-101936.6;unigene-101936.7;unigene-102947.0;unigene-103406.0;unigene-104354.0;unigene-105163.0;unigene-105267.0;unigene-105267.1;unigene-105267.2;unigene-105267.3;unigene-105267.4;unigene-105267.5;unigene-105503.0;unigene-…	K00128+K00286+K00294+K00318+K00472+K00797+K00811+K00819+K01259+K01426+K01476+K01581+K01583+K01611+K10536+K12251+K12259+K12657+K13366+K13427+K14085+K14454+K14455+K17839
Ascorbate and aldarate metabolism	ko00053	unigene-101017.0;unigene-101826.1;unigene-101826.2;unigene-101826.3;unigene-103859.0;unigene-103859.1;unigene-103859.3;unigene-103859.4;unigene-103859.5;unigene-103859.6;unigene-103859.7;unigene-21666.34155;unigene-21666.45684;unigene-21666.63653;unigene-44945.0;unigene-5001.0;unigene-99671.0;unigene-20176.0;unigene-100253.0;unigene-100255.0;unigene-100904.0;unigene-101604.0;unigene-101936.0;unig…	K00012+K00103+K00128+K00225+K00423+K00434+K00469+K08232+K10046+K10047+K12447+K14085+K14190+K16190+K17744+K18649+K21888
beta-Alanine metabolism	ko00410	unigene-100253.0;unigene-100255.0;unigene-100904.0;unigene-101604.0;unigene-101936.0;unigene-101936.1;unigene-101936.2;unigene-101936.3;unigene-101936.4;unigene-101936.5;unigene-101936.6;unigene-101936.7;unigene-102947.0;unigene-103406.0;unigene-104354.0;unigene-105163.0;unigene-105267.0;unigene-105267.1;unigene-105267.2;unigene-105267.3;unigene-105267.4;unigene-105267.5;unigene-105503.0;unigene-…	K00128+K00140+K00207+K00232+K00276+K00797+K01431+K01464+K01578+K01580+K01692+K01918+K05605+K12259+K13366+K14085+K17839
Fructose and mannose metabolism	ko00051	unigene-102711.0;unigene-104930.0;unigene-104930.1;unigene-107550.0;unigene-110613.0;unigene-110819.0;unigene-11088.0;unigene-114044.0;unigene-114542.0;unigene-114735.0;unigene-114964.1;unigene-114980.0;unigene-115019.0;unigene-115019.1;unigene-12738.0;unigene-12753.0;unigene-13669.0;unigene-1538.0;unigene-16480.0;unigene-21460.0;unigene-21666.112161;unigene-21666.116272;unigene-21666.119991;unig…	K00008+K00844+K00847+K00850+K00863+K00895+K00966+K01103+K01623+K01711+K01803+K01805+K01809+K02377+K03841+K05305+K17497+K18447+K19355
Inositol phosphate metabolism	ko00562	unigene-101328.0;unigene-10427.0;unigene-104966.0;unigene-105932.0;unigene-105932.1;unigene-105932.2;unigene-105932.3;unigene-105932.4;unigene-108782.0;unigene-111153.0;unigene-111272.0;unigene-112342.0;unigene-11249.0;unigene-113489.0;unigene-114669.0;unigene-16720.0;unigene-18077.0;unigene-21666.141253;unigene-21666.150262;unigene-21666.170616;unigene-21666.170617;unigene-21666.170618;unigene-2…	K00140+K00469+K00888+K00889+K00913+K00914+K00915+K00921+K00999+K01092+K01110+K01114+K01765+K01803+K01858+K03103+K05857+K10047+K10572+K15422+K18081+K18649+K19517+K19801+K21797+K22913
Alanine, aspartate and glutamate metabolism	ko00250	unigene-112930.0;unigene-21666.148317;unigene-21666.157213;unigene-21666.162378;unigene-21666.17981;unigene-21666.180637;unigene-21666.180638;unigene-21666.180639;unigene-21666.180640;unigene-21666.180641;unigene-21666.180642;unigene-21666.180643;unigene-21666.216046;unigene-21666.216047;unigene-21666.244661;unigene-21666.249130;unigene-21666.81399;unigene-21666.81400;unigene-21666.81408;unigene-…	K00261+K00262+K00264+K00278+K00294+K00609+K00764+K00811+K00814+K00820+K00827+K00830+K01580+K01755+K01756+K01915+K01939+K01940+K01953+K01955+K01956+K13051+K13566+K14272+K14454+K14455+K16871+K17761
Lysine degradation	ko00310	unigene-100253.0;unigene-100255.0;unigene-100904.0;unigene-101604.0;unigene-101936.0;unigene-101936.1;unigene-101936.2;unigene-101936.3;unigene-101936.4;unigene-101936.5;unigene-101936.6;unigene-101936.7;unigene-102947.0;unigene-103406.0;unigene-104354.0;unigene-105163.0;unigene-105267.0;unigene-105267.1;unigene-105267.2;unigene-105267.3;unigene-105267.4;unigene-105267.5;unigene-105503.0;unigene-…	K00128+K00306+K00382+K00626+K00658+K01692+K11420+K11423+K11430+K11433+K14085+K14157+K18826+K19199+K22748
Phosphatidylinositol signaling system	ko04070	unigene-10275.0;unigene-109261.0;unigene-110443.0;unigene-21666.120276;unigene-21666.173763;unigene-21666.186389;unigene-21666.186390;unigene-21666.186391;unigene-21666.192689;unigene-21666.210930;unigene-21666.230872;unigene-21666.239164;unigene-21666.33820;unigene-21666.33821;unigene-21666.38718;unigene-21666.40620;unigene-21666.41465;unigene-21666.58595;unigene-21666.71613;unigene-23071.0;unig…	K00888+K00889+K00901+K00913+K00914+K00915+K00921+K00981+K00999+K01092+K01110+K02183+K05857+K10047+K10572+K13024+K15422+K18081+K18649+K19801+K21797
Aminoacyl-tRNA biosynthesis	ko00970	unigene-21666.15413;unigene-21666.180473;unigene-21666.190332;unigene-21666.190333;unigene-21666.217599;unigene-21666.223278;unigene-21666.223723;unigene-21666.238123;unigene-21666.3443;unigene-21666.4008;unigene-21666.4009;unigene-26318.0;unigene-28967.0;unigene-33430.0;unigene-49267.0;unigene-67265.0;unigene-102850.1;unigene-102850.2;unigene-110716.0;unigene-21666.102076;unigene-21666.105449;un…	K00604+K01866+K01867+K01868+K01869+K01870+K01872+K01873+K01874+K01875+K01876+K01880+K01881+K01883+K01885+K01886+K01887+K01889+K01890+K01892+K01893+K02434+K02435+K04567+K14164
Nucleotide excision repair	ko03420	unigene-19405.0;unigene-21666.12258;unigene-21666.142950;unigene-21666.197313;unigene-21666.197315;unigene-21666.197316;unigene-21666.197317;unigene-21666.197319;unigene-21666.197320;unigene-21666.199150;unigene-21666.199151;unigene-21666.220030;unigene-21666.220031;unigene-21666.220032;unigene-21666.32249;unigene-28738.0;unigene-40827.0;unigene-40829.0;unigene-44882.0;unigene-44882.1;unigene-740…	K02202+K02324+K02325+K02326+K02327+K02328+K02335+K03141+K03142+K03143+K03144+K03504+K03505+K03868+K04802+K06634+K07466+K10140+K10570+K10609+K10610+K10739+K10740+K10747+K10754+K10755+K10756+K10838+K10839+K10841+K10842+K10843+K10844+K10845+K10846+K10848+K10849
Glycine, serine and threonine metabolism	ko00260	unigene-111755.0;unigene-114574.0;unigene-18713.0;unigene-19483.0;unigene-21666.11149;unigene-21666.112936;unigene-21666.118531;unigene-21666.122029;unigene-21666.127396;unigene-21666.131508;unigene-21666.154835;unigene-21666.15844;unigene-21666.166955;unigene-21666.180705;unigene-21666.195383;unigene-21666.2041;unigene-21666.228367;unigene-21666.228369;unigene-21666.233164;unigene-21666.241068;u…	K00058+K00108+K00130+K00133+K00276+K00281+K00306+K00382+K00499+K00600+K00605+K00827+K00830+K00831+K00872+K00928+K01079+K01620+K01695+K01696+K01733+K01754+K01834+K02437+K06001+K12235+K12524+K14085+K14272+K15633+K15634+K15893+K15918+K15919
Circadian rhythm - plant	ko04712	unigene-21666.15609;unigene-21666.193935;unigene-21666.32438;unigene-22054.0;unigene-51487.0;unigene-67125.0;unigene-89237.0;unigene-10582.0;unigene-110282.0;unigene-12090.0;unigene-21666.116838;unigene-21666.130814;unigene-21666.130815;unigene-21666.133293;unigene-21666.133294;unigene-21666.136458;unigene-21666.144949;unigene-21666.146924;unigene-21666.150362;unigene-21666.150363;unigene-21666.1…	K00660+K03097+K03115+K10143+K12115+K12116+K12118+K12119+K12120+K12121+K12124+K12125+K12127+K12129+K12130+K12133+K16221+K16223+K16240+K16241
2-Oxocarboxylic acid metabolism	ko01210	unigene-104856.0;unigene-105076.0;unigene-113037.0;unigene-12638.0;unigene-16429.0;unigene-21666.101429;unigene-21666.133397;unigene-21666.141648;unigene-21666.166798;unigene-21666.184760;unigene-21666.185170;unigene-21666.187270;unigene-21666.19112;unigene-21666.197657;unigene-21666.209899;unigene-21666.21437;unigene-21666.21438;unigene-21666.230686;unigene-21666.233760;unigene-21666.233761;unig…	K00030+K00031+K00052+K00053+K00133+K00145+K00620+K00811+K00814+K00818+K00826+K00928+K00930+K01438+K01647+K01649+K01652+K01653+K01681+K01687+K01703+K01704+K14272+K14454+K14455+K14677+K14682
Proteasome	ko03050	unigene-21666.12674;unigene-21666.134074;unigene-21666.170593;unigene-21666.18231;unigene-21666.211457;unigene-21666.35639;unigene-21666.35640;unigene-65352.0;unigene-90253.0;unigene-21666.129848;unigene-21666.182568;unigene-21666.20302;unigene-21666.210622;unigene-21666.35181;unigene-21666.43313;unigene-21666.43314;unigene-21666.43315;unigene-21666.49308;unigene-21666.54557;unigene-21666.54558;u…	K02725+K02726+K02727+K02728+K02729+K02730+K02731+K02732+K02734+K02735+K02736+K02737+K02738+K02739+K03028+K03029+K03030+K03031+K03032+K03033+K03035+K03036+K03037+K03038+K03039+K03061+K03062+K03063+K03064+K03065+K03066+K06691+K06699+K06700+K10881+K11599
Autophagy - other	ko04136	unigene-21666.1268;unigene-21666.199511;unigene-21666.199512;unigene-21666.199515;unigene-21666.199516;unigene-21666.199518;unigene-21666.199519;unigene-21666.205306;unigene-21666.205307;unigene-21666.241131;unigene-21666.241132;unigene-21666.32397;unigene-21666.3352;unigene-45583.0;unigene-83144.0;unigene-104919.0;unigene-108896.0;unigene-109189.0;unigene-109997.0;unigene-110589.0;unigene-115465…	K00914+K04382+K07203+K07204+K08266+K08269+K08330+K08331+K08333+K08334+K08336+K08337+K08339+K08341+K08342+K08343+K17606+K17888+K17890+K17906+K17907+K17908+K19730
Pyrimidine metabolism	ko00240	unigene-21666.100735;unigene-21666.102481;unigene-21666.66094;unigene-40574.0;unigene-66635.0;unigene-66635.1;unigene-66635.2;unigene-66635.3;unigene-66635.4;unigene-98062.1;unigene-112228.0;unigene-112228.1;unigene-112228.2;unigene-15796.0;unigene-39907.0;unigene-52927.0;unigene-70268.0;unigene-7506.0;unigene-78969.0;unigene-80486.0;unigene-21666.224721;unigene-21666.38395;unigene-61082.0;unigen…	K00207+K00254+K00609+K00761+K00857+K00876+K00940+K00943+K01081+K01240+K01431+K01464+K01465+K01489+K01510+K01520+K01937+K01955+K01956+K03787+K06966+K09903+K10807+K10808+K13421+K13800+K13998+K14641+K16329+K16904
Galactose metabolism	ko00052	unigene-10897.0;unigene-110169.0;unigene-110840.0;unigene-113171.0;unigene-12679.0;unigene-17370.0;unigene-17370.1;unigene-17370.2;unigene-21666.106302;unigene-21666.106675;unigene-21666.109455;unigene-21666.118912;unigene-21666.128056;unigene-21666.128091;unigene-21666.131399;unigene-21666.13411;unigene-21666.150042;unigene-21666.150052;unigene-21666.150053;unigene-21666.159474;unigene-21666.159…	K00844+K00850+K00963+K00965+K01187+K01190+K01193+K01784+K01785+K01835+K06617+K07407+K12309+K12447+K18819
Fatty acid biosynthesis	ko00061	unigene-100085.0;unigene-104687.0;unigene-104766.0;unigene-104795.0;unigene-107070.0;unigene-109243.0;unigene-111099.0;unigene-111669.0;unigene-111880.1;unigene-112550.0;unigene-112650.0;unigene-112650.2;unigene-11292.0;unigene-112924.0;unigene-113017.0;unigene-113018.0;unigene-115639.0;unigene-116380.0;unigene-12110.0;unigene-12360.0;unigene-13399.0;unigene-13812.0;unigene-13942.0;unigene-15310.…	K00059+K00208+K00645+K00648+K01897+K02372+K03921+K07512+K09458+K10781+K10782+K11262+K18660
Tyrosine metabolism	ko00350	unigene-10067.0;unigene-100878.0;unigene-102866.0;unigene-108188.0;unigene-108493.0;unigene-110029.0;unigene-110866.0;unigene-114359.0;unigene-114735.1;unigene-11604.0;unigene-12155.0;unigene-12156.0;unigene-13053.0;unigene-16200.0;unigene-16200.1;unigene-20554.0;unigene-21666.100294;unigene-21666.103344;unigene-21666.105068;unigene-21666.116147;unigene-21666.118234;unigene-21666.120475;unigene-2…	K00001+K00121+K00276+K00422+K00451+K00457+K00811+K00815+K00817+K01555+K01557+K01593+K01800+K07253+K14454+K14455+K15849+K18857
Histidine metabolism	ko00340	unigene-10721.0;unigene-21666.100453;unigene-21666.100972;unigene-21666.100973;unigene-21666.100974;unigene-21666.109027;unigene-21666.109028;unigene-21666.109029;unigene-21666.116449;unigene-21666.116450;unigene-21666.116451;unigene-21666.116452;unigene-21666.116453;unigene-21666.116454;unigene-21666.116455;unigene-21666.116456;unigene-21666.116457;unigene-21666.116458;unigene-21666.136080;unige…	K00013+K00128+K00765+K00817+K01590+K01663+K01693+K01814+K11755+K14085+K18649+K19787
Photosynthesis	ko00195	unigene-21666.22099;unigene-21666.22217;unigene-21666.106697;unigene-21666.119329;unigene-21666.129146;unigene-21666.80763;unigene-43286.0;unigene-43487.0;unigene-80095.0;unigene-107921.3;unigene-21666.123555;unigene-21666.87149;unigene-67705.5;unigene-105112.0;unigene-113234.0;unigene-113740.0;unigene-113740.1;unigene-21666.65421;unigene-10280.0;unigene-21666.102455;unigene-21666.114572;unigene-…	K02108+K02109+K02111+K02112+K02113+K02114+K02115+K02634+K02635+K02636+K02638+K02639+K02640+K02641+K02689+K02690+K02692+K02693+K02694+K02695+K02696+K02698+K02699+K02701+K02703+K02704+K02705+K02706+K02707+K02709+K02711+K02714+K02716+K02717+K02721+K02723+K03541+K03542+K03689+K08901+K08902+K08903+K08905+K08906+K14332
Propanoate metabolism	ko00640	unigene-101141.0;unigene-101141.1;unigene-101141.2;unigene-21666.133261;unigene-21666.134269;unigene-21666.134270;unigene-21666.134271;unigene-21666.140860;unigene-21666.15856;unigene-21666.175843;unigene-21666.178941;unigene-21666.195305;unigene-21666.228116;unigene-21666.239570;unigene-21666.250134;unigene-39229.0;unigene-96826.0;unigene-101328.0;unigene-10427.0;unigene-104966.0;unigene-105932.…	K00016+K00140+K00166+K00167+K00232+K00382+K00626+K01578+K01692+K01895+K01899+K01900+K05605+K09699+K11262
Photosynthesis - antenna proteins	ko00196	unigene-104597.1;unigene-113539.0;unigene-21149.0;unigene-2144.0;unigene-21666.106454;unigene-21666.108607;unigene-21666.116273;unigene-21666.118895;unigene-21666.121610;unigene-21666.122377;unigene-21666.123395;unigene-21666.126359;unigene-21666.126365;unigene-21666.128010;unigene-21666.129694;unigene-21666.133568;unigene-21666.133570;unigene-21666.169769;unigene-21666.169770;unigene-21666.18155…	K08907+K08908+K08909+K08910+K08911+K08912+K08913+K08914+K08915+K08916+K08917+K14172
Homologous recombination	ko03440	unigene-109022.0;unigene-109022.1;unigene-21666.112211;unigene-21666.133002;unigene-21666.172110;unigene-21666.183310;unigene-21666.46834;unigene-21666.46835;unigene-21666.46836;unigene-38576.0;unigene-38577.0;unigene-38578.0;unigene-40022.0;unigene-59774.0;unigene-61633.0;unigene-77171.0;unigene-51647.0;unigene-56623.0;unigene-21666.148430;unigene-21666.148431;unigene-21666.148432;unigene-21666.…	K02327+K02328+K02335+K03111+K03165+K03504+K03505+K03553+K03655+K04482+K04728+K07466+K08775+K08991+K10683+K10728+K10739+K10740+K10865+K10866+K10867+K10869+K10870+K10871+K10875+K10880+K10881+K10882+K10901+K11864+K12173+K20776
Basal transcription factors	ko03022	unigene-19405.0;unigene-21666.12258;unigene-21666.142950;unigene-21666.197313;unigene-21666.197315;unigene-21666.197316;unigene-21666.197317;unigene-21666.197319;unigene-21666.197320;unigene-21666.199150;unigene-21666.199151;unigene-21666.220030;unigene-21666.220031;unigene-21666.220032;unigene-21666.32249;unigene-28738.0;unigene-40827.0;unigene-40829.0;unigene-44882.0;unigene-44882.1;unigene-740…	K02202+K03120+K03122+K03123+K03124+K03125+K03126+K03127+K03128+K03129+K03130+K03131+K03132+K03133+K03134+K03135+K03136+K03137+K03138+K03139+K03141+K03142+K03143+K03144+K06634+K10842+K10843+K10844+K10845+K14649
alpha-Linolenic acid metabolism	ko00592	unigene-106535.0;unigene-1091.0;unigene-116311.1;unigene-13024.0;unigene-13024.1;unigene-21666.14205;unigene-21666.156873;unigene-21666.158261;unigene-21666.167589;unigene-21666.167590;unigene-21666.167592;unigene-21666.187028;unigene-21666.187029;unigene-21666.211591;unigene-21666.222991;unigene-21666.235305;unigene-21666.242234;unigene-21666.242235;unigene-21666.244770;unigene-21666.49758;unige…	K00224+K00232+K00454+K01047+K01723+K05894+K07513+K10525+K10526+K10527+K10528+K14674+K16818+K18857+K22389
Porphyrin and chlorophyll metabolism	ko00860	unigene-16302.0;unigene-21666.100225;unigene-21666.116007;unigene-21666.118795;unigene-21666.119919;unigene-21666.122664;unigene-21666.123956;unigene-21666.123958;unigene-21666.128512;unigene-21666.128517;unigene-21666.132398;unigene-21666.133911;unigene-21666.143703;unigene-21666.148154;unigene-21666.150221;unigene-21666.157704;unigene-21666.161806;unigene-21666.167987;unigene-21666.18349;unigen…	K00218+K00228+K00231+K01599+K01698+K01719+K01749+K01772+K01845+K01885+K02257+K02259+K02303+K02492+K03403+K03404+K03405+K03428+K03794+K04035+K04040+K08099+K08101+K10960+K13071+K13545+K13600+K13606+K18010+K19054+K19073+K21480+K22013
Protein export	ko03060	unigene-21666.110017;unigene-21666.110019;unigene-21666.135296;unigene-21666.135297;unigene-21666.135298;unigene-21666.162880;unigene-21666.162882;unigene-21666.162883;unigene-21666.162884;unigene-21666.162885;unigene-21666.162886;unigene-21666.162887;unigene-21666.162888;unigene-21666.162890;unigene-21666.182695;unigene-21666.193742;unigene-21666.194745;unigene-21666.194747;unigene-21666.200692;…	K03070+K03100+K03104+K03105+K03106+K03107+K03108+K03109+K03110+K03116+K03118+K03217+K07342+K09481+K09490+K09540+K09647+K09648+K10956+K12272+K12275+K12946+K12947+K12948+K13280+K13431
N-Glycan biosynthesis	ko00510	unigene-21666.64276;unigene-21666.64280;unigene-49587.0;unigene-60633.0;unigene-61209.0;unigene-99529.0;unigene-21666.120586;unigene-21666.238117;unigene-21666.238118;unigene-21666.33078;unigene-21666.55053;unigene-21666.56940;unigene-21666.8337;unigene-21666.8338;unigene-51100.0;unigene-51755.0;unigene-54533.0;unigene-68066.0;unigene-68066.1;unigene-68066.2;unigene-76659.0;unigene-76660.0;unigen…	K00721+K00726+K00729+K00736+K00737+K00902+K01001+K01228+K01230+K01231+K03842+K03843+K03844+K03845+K03846+K03847+K03848+K03849+K03850+K05546+K07151+K07252+K07432+K07441+K09658+K09659+K12345+K12666+K12667+K12668+K12669+K12670
ABC transporters	ko02010	unigene-101489.0;unigene-101489.1;unigene-104075.0;unigene-104770.0;unigene-104951.0;unigene-106852.0;unigene-108058.0;unigene-108253.0;unigene-108253.1;unigene-108253.2;unigene-10861.0;unigene-108881.0;unigene-109546.0;unigene-111114.0;unigene-11277.0;unigene-112788.1;unigene-112855.0;unigene-113787.1;unigene-114809.0;unigene-114809.1;unigene-116136.0;unigene-116136.1;unigene-12882.0;unigene-138…	K05658+K05663+K05674
DNA replication	ko03030	unigene-106630.0;unigene-40581.0;unigene-47249.0;unigene-53516.0;unigene-56831.0;unigene-77505.0;unigene-77506.0;unigene-77507.0;unigene-82901.0;unigene-100384.0;unigene-13957.0;unigene-21666.199653;unigene-21666.199654;unigene-21666.199655;unigene-21666.66170;unigene-21666.84586;unigene-25707.0;unigene-61419.0;unigene-61419.1;unigene-62804.0;unigene-94661.0;unigene-94662.0;unigene-21666.202694;u…	K02209+K02210+K02212+K02320+K02321+K02324+K02325+K02326+K02327+K02328+K02335+K02540+K02541+K02542+K02684+K02685+K03111+K03504+K03505+K04799+K04802+K07466+K10739+K10740+K10742+K10743+K10744+K10745+K10747+K10754+K10755+K10756
Terpenoid backbone biosynthesis	ko00900	unigene-103273.2;unigene-103273.3;unigene-103274.0;unigene-113155.0;unigene-114658.0;unigene-21666.118157;unigene-21666.162091;unigene-21666.211546;unigene-21666.3941;unigene-21666.3942;unigene-21666.63102;unigene-30023.0;unigene-36610.0;unigene-53216.0;unigene-55692.0;unigene-70226.0;unigene-70226.1;unigene-72331.1;unigene-75575.0;unigene-83634.0;unigene-94911.0;unigene-98640.0;unigene-21666.105…	K00021+K00099+K00587+K00626+K00787+K00869+K00919+K00938+K00991+K01597+K01641+K01662+K01770+K01823+K03526+K03527+K05356+K05954+K05955+K06013+K06981+K08658+K10960+K11778+K13789+K14066+K15889+K15891+K15892
Phenylalanine, tyrosine and tryptophan biosynthesis	ko00400	unigene-15138.0;unigene-21666.1174;unigene-21666.119422;unigene-21666.119423;unigene-21666.119715;unigene-21666.127665;unigene-21666.140063;unigene-21666.239884;unigene-21666.36434;unigene-21666.86908;unigene-57920.0;unigene-21666.126865;unigene-21666.142757;unigene-21666.146134;unigene-21666.146135;unigene-21666.146136;unigene-21666.181445;unigene-21666.204881;unigene-21666.28329;unigene-21666.3…	K00766+K00800+K00811+K00815+K00817+K00891+K01609+K01626+K01657+K01658+K01695+K01696+K01735+K01736+K01817+K01850+K05359+K06001+K13832+K14454+K14455+K15227+K15849
Ubiquinone and other terpenoid-quinone biosynthesis	ko00130	unigene-21666.100013;unigene-21666.100018;unigene-21666.119441;unigene-21666.129605;unigene-21666.199075;unigene-21666.40761;unigene-21666.84266;unigene-30599.0;unigene-33282.0;unigene-7899.0;unigene-93363.0;unigene-98489.0;unigene-100735.0;unigene-105775.0;unigene-106993.0;unigene-106993.1;unigene-107501.0;unigene-11104.0;unigene-21041.0;unigene-21666.142405;unigene-21666.148148;unigene-21666.14…	K00457+K00487+K00591+K00815+K01661+K01904+K02548+K02552+K03183+K03809+K05928+K06125+K06126+K06127+K09833+K09834+K12501+K12502+K17872+K19222
Various types of N-glycan biosynthesis	ko00513	unigene-21666.120586;unigene-21666.238117;unigene-21666.238118;unigene-21666.33078;unigene-21666.55053;unigene-21666.56940;unigene-21666.8337;unigene-21666.8338;unigene-51100.0;unigene-51755.0;unigene-54533.0;unigene-68066.0;unigene-68066.1;unigene-68066.2;unigene-76659.0;unigene-76660.0;unigene-7960.0;unigene-93861.0;unigene-21666.226528;unigene-21666.226529;unigene-109057.4;unigene-113667.0;uni…	K00726+K00736+K00753+K01230+K01231+K03714+K03842+K03843+K03844+K03845+K03846+K03847+K07151+K07432+K07441+K12373+K12666+K12667+K12668+K12669+K12670+K14412+K14413
Mismatch repair	ko03430	unigene-109022.0;unigene-109022.1;unigene-21666.112211;unigene-21666.133002;unigene-21666.172110;unigene-21666.183310;unigene-21666.46834;unigene-21666.46835;unigene-21666.46836;unigene-38576.0;unigene-38577.0;unigene-38578.0;unigene-40022.0;unigene-59774.0;unigene-61633.0;unigene-77171.0;unigene-51647.0;unigene-56623.0;unigene-21666.134170;unigene-21666.147625;unigene-21666.165597;unigene-21666.…	K02327+K02328+K03111+K03504+K03505+K04802+K07456+K07466+K08734+K08735+K08736+K08737+K10739+K10740+K10747+K10754+K10755+K10756+K10858
Pentose and glucuronate interconversions	ko00040	unigene-100225.0;unigene-1009.0;unigene-103288.0;unigene-105046.0;unigene-105072.0;unigene-105194.0;unigene-105545.0;unigene-105582.0;unigene-105582.1;unigene-106572.0;unigene-107017.0;unigene-108084.1;unigene-108117.0;unigene-111216.0;unigene-111559.0;unigene-14911.0;unigene-16595.0;unigene-17151.0;unigene-17694.0;unigene-17695.0;unigene-18044.0;unigene-18318.0;unigene-19093.0;unigene-19656.0;un…	K00002+K00008+K00012+K00854+K00963+K01051+K01184+K01213+K01728+K01783+K01805+K12447+K16190+K22935
Limonene and pinene degradation	ko00903	unigene-100253.0;unigene-100255.0;unigene-100904.0;unigene-101604.0;unigene-101936.0;unigene-101936.1;unigene-101936.2;unigene-101936.3;unigene-101936.4;unigene-101936.5;unigene-101936.6;unigene-101936.7;unigene-102947.0;unigene-103406.0;unigene-104354.0;unigene-105163.0;unigene-105267.0;unigene-105267.1;unigene-105267.2;unigene-105267.3;unigene-105267.4;unigene-105267.5;unigene-105503.0;unigene-…	K00128+K01692
Base excision repair	ko03410	unigene-102431.0;unigene-105522.0;unigene-105522.1;unigene-105522.2;unigene-105522.3;unigene-19531.0;unigene-21666.1153;unigene-21666.126309;unigene-21666.161370;unigene-21666.176081;unigene-21666.198119;unigene-21666.235852;unigene-21666.235853;unigene-21666.7481;unigene-21666.8013;unigene-21666.8014;unigene-21666.8016;unigene-21666.8017;unigene-21666.8693;unigene-22272.0;unigene-28379.0;unigene…	K01142+K01246+K01247+K02324+K02325+K02326+K02327+K02328+K02335+K03504+K03505+K03512+K03575+K03648+K03652+K03660+K04799+K04802+K10563+K10747+K10772+K10773+K10798+K10801+K10802+K10803
Phenylalanine metabolism	ko00360	unigene-21666.161607;unigene-21666.161608;unigene-21666.185278;unigene-21666.185279;unigene-21666.185280;unigene-21666.192580;unigene-21666.22823;unigene-21666.50159;unigene-21666.55666;unigene-21666.55667;unigene-21666.75431;unigene-21666.95108;unigene-75088.0;unigene-75088.1;unigene-77142.0;unigene-107205.0;unigene-109234.0;unigene-110634.0;unigene-111883.0;unigene-115041.0;unigene-11513.0;unig…	K00074+K00276+K00457+K00811+K00815+K00817+K01426+K01593+K01692+K07253+K10775+K13064+K14454+K14455+K15849
Butanoate metabolism	ko00650	unigene-21666.161607;unigene-21666.161608;unigene-21666.185278;unigene-21666.185279;unigene-21666.185280;unigene-21666.192580;unigene-21666.22823;unigene-21666.50159;unigene-21666.55666;unigene-21666.55667;unigene-21666.75431;unigene-21666.95108;unigene-75088.0;unigene-75088.1;unigene-77142.0;unigene-101737.0;unigene-21666.158767;unigene-21666.169618;unigene-21666.192536;unigene-21666.192537;unig…	K00074+K00109+K00626+K01580+K01640+K01641+K01652+K01653+K01692+K16871+K17761+K18121
Arginine biosynthesis	ko00220	unigene-101797.0;unigene-15756.0;unigene-21666.105866;unigene-21666.113455;unigene-22565.0;unigene-79230.0;unigene-79230.1;unigene-79230.2;unigene-79544.0;unigene-112930.0;unigene-21666.148317;unigene-21666.157213;unigene-21666.162378;unigene-21666.17981;unigene-21666.180637;unigene-21666.180638;unigene-21666.180639;unigene-21666.180640;unigene-21666.180641;unigene-21666.180642;unigene-21666.1806…	K00145+K00261+K00262+K00611+K00620+K00811+K00814+K00818+K00930+K01427+K01438+K01476+K01755+K01915+K01940+K13427+K14272+K14454+K14455+K14677+K14682
SNARE interactions in vesicular transport	ko04130	unigene-109244.0;unigene-115129.0;unigene-12228.0;unigene-17141.0;unigene-18298.0;unigene-18298.1;unigene-18299.0;unigene-21666.195386;unigene-21666.203379;unigene-21666.206410;unigene-21666.212480;unigene-21666.212481;unigene-21666.226278;unigene-21666.242915;unigene-21666.242916;unigene-21666.242917;unigene-21666.41207;unigene-21666.9216;unigene-21666.92792;unigene-21666.92793;unigene-5145.0;un…	K08486+K08489+K08490+K08492+K08493+K08495+K08496+K08497+K08498+K08500+K08501+K08503+K08504+K08505+K08506+K08507+K08515+K08516+K08517
Tropane, piperidine and pyridine alkaloid biosynthesis	ko00960	unigene-107205.0;unigene-109234.0;unigene-110634.0;unigene-111883.0;unigene-115041.0;unigene-11513.0;unigene-1644.0;unigene-18568.0;unigene-21666.134221;unigene-21666.135244;unigene-21666.147778;unigene-21666.151807;unigene-21666.164448;unigene-21666.164449;unigene-21666.164450;unigene-21666.169821;unigene-21666.185084;unigene-21666.192430;unigene-21666.196531;unigene-21666.204639;unigene-21666.2…	K00276+K00811+K00815+K00817+K08081+K14454+K14455+K15849
Sphingolipid metabolism	ko00600	unigene-102238.0;unigene-104276.0;unigene-1078.0;unigene-110854.0;unigene-110854.1;unigene-114091.4;unigene-114091.5;unigene-114091.6;unigene-114447.0;unigene-114447.1;unigene-18489.0;unigene-21666.156875;unigene-21666.156876;unigene-21666.156877;unigene-21666.156878;unigene-21666.156879;unigene-21666.156880;unigene-21666.156881;unigene-21666.156882;unigene-21666.17338;unigene-21666.189631;unigen…	K00654+K01190+K01634+K04708+K04711+K04712+K04713+K04715+K04718+K07407+K12309+K12349+K17108
RNA polymerase	ko03020	unigene-21666.131677;unigene-111619.0;unigene-21666.16586;unigene-30667.0;unigene-33349.0;unigene-36272.0;unigene-54676.0;unigene-54676.1;unigene-61348.0;unigene-66643.0;unigene-21666.144336;unigene-21666.65939;unigene-21666.65940;unigene-21666.65941;unigene-21666.65942;unigene-63117.0;unigene-21666.219751;unigene-67967.0;unigene-21666.110349;unigene-21666.19640;unigene-21666.19641;unigene-21666.…	K02999+K03000+K03002+K03004+K03005+K03006+K03007+K03008+K03009+K03010+K03011+K03012+K03013+K03014+K03015+K03016+K03017+K03018+K03019+K03020+K03021+K03022+K03023+K03024+K03025+K03026+K03027+K03040+K03043+K03046+K14721
Carotenoid biosynthesis	ko00906	unigene-21666.129491;unigene-21666.129493;unigene-21666.129494;unigene-21666.157105;unigene-21666.218799;unigene-21666.241353;unigene-85991.0;unigene-85994.0;unigene-111116.0;unigene-12031.0;unigene-21666.102805;unigene-21666.129043;unigene-21666.142527;unigene-21666.211550;unigene-21666.212159;unigene-21666.212160;unigene-21666.217357;unigene-21666.248018;unigene-21666.249157;unigene-21666.27171…	K00514+K02291+K02293+K06443+K06444+K09835+K09837+K09838+K09839+K09840+K09841+K09842+K09843+K15744+K15746+K15747+K17911+K17912+K17913
Steroid biosynthesis	ko00100	unigene-21666.103764;unigene-21666.103777;unigene-21666.103783;unigene-21666.1120;unigene-21666.12305;unigene-21666.149053;unigene-21666.149054;unigene-21666.149055;unigene-21666.149056;unigene-21666.149061;unigene-21666.149062;unigene-21666.155335;unigene-21666.167227;unigene-21666.191495;unigene-21666.228590;unigene-21666.228591;unigene-21666.229463;unigene-21666.229464;unigene-21666.242704;uni…	K00213+K00222+K00227+K00511+K00559+K00801+K01824+K01853+K05917+K07748+K08242+K08246+K09832+K14423+K14424+K14674
Sulfur metabolism	ko00920	unigene-102716.0;unigene-106178.0;unigene-107965.0;unigene-10967.0;unigene-112937.0;unigene-17594.0;unigene-2039.0;unigene-21639.0;unigene-21666.110563;unigene-21666.110564;unigene-21666.110565;unigene-21666.110569;unigene-21666.129120;unigene-21666.129121;unigene-21666.129800;unigene-21666.69852;unigene-21666.84490;unigene-21666.84491;unigene-21666.84492;unigene-22644.0;unigene-23192.0;unigene-2…	K00387+K00392+K00640+K00860+K01011+K01082+K01738+K01739+K05907+K13034+K13811+K15422+K17285+K17725+K22966
Flavonoid biosynthesis	ko00941	unigene-111488.1;unigene-21666.143937;unigene-21666.45820;unigene-21666.61477;unigene-49442.0;unigene-49823.0;unigene-68836.0;unigene-100735.0;unigene-105775.0;unigene-106993.0;unigene-106993.1;unigene-107501.0;unigene-11104.0;unigene-21041.0;unigene-21666.142405;unigene-21666.148148;unigene-21666.148149;unigene-21666.148150;unigene-21666.173303;unigene-21666.181840;unigene-21666.181843;unigene-2…	K00475+K00487+K00588+K00660+K01859+K05277+K05278+K05280+K08695+K09754+K13065+K13081+K22440+K23180
Pantothenate and CoA biosynthesis	ko00770	unigene-12397.0;unigene-12397.1;unigene-12397.2;unigene-18104.0;unigene-21666.101163;unigene-21666.104958;unigene-21666.106888;unigene-21666.107208;unigene-21666.107398;unigene-21666.107411;unigene-21666.120427;unigene-21666.122553;unigene-21666.122870;unigene-21666.124219;unigene-21666.138482;unigene-21666.141221;unigene-21666.145870;unigene-21666.154403;unigene-21666.154404;unigene-21666.159364…	K00053+K00207+K00606+K00826+K00859+K01431+K01464+K01598+K01652+K01653+K01687+K01918+K01922+K02201+K06133+K09680
Diterpenoid biosynthesis	ko00904	unigene-21666.108677;unigene-21666.114149;unigene-21666.114150;unigene-21666.180432;unigene-21666.206053;unigene-21666.29433;unigene-21666.50506;unigene-21666.93530;unigene-35078.0;unigene-6828.0;unigene-73128.0;unigene-21666.181510;unigene-21666.181511;unigene-21666.203734;unigene-21666.62623;unigene-33495.0;unigene-56896.0;unigene-94804.1;unigene-18343.0;unigene-21666.226968;unigene-40326.0;uni…	K04120+K04121+K04122+K04123+K04124+K04125+K05282+K13070+K14038+K14043+K16083+K16084+K16085+K21291+K21718+K21719
Biotin metabolism	ko00780	unigene-100085.0;unigene-104687.0;unigene-104766.0;unigene-104795.0;unigene-107070.0;unigene-109243.0;unigene-111099.0;unigene-111669.0;unigene-111880.1;unigene-112550.0;unigene-112650.0;unigene-112650.2;unigene-11292.0;unigene-112924.0;unigene-113017.0;unigene-113018.0;unigene-115639.0;unigene-116380.0;unigene-12110.0;unigene-12360.0;unigene-13399.0;unigene-13812.0;unigene-13942.0;unigene-15310.…	K00059+K00208+K00652+K01012+K01942+K02372+K09458+K19562
Biosynthesis of unsaturated fatty acids	ko01040	unigene-100452.0;unigene-106203.0;unigene-11278.0;unigene-12076.0;unigene-21666.107818;unigene-21666.115230;unigene-21666.116363;unigene-21666.1200;unigene-21666.1201;unigene-21666.120193;unigene-21666.1202;unigene-21666.123382;unigene-21666.126051;unigene-21666.130707;unigene-21666.130711;unigene-21666.137964;unigene-21666.137965;unigene-21666.137966;unigene-21666.137967;unigene-21666.150206;uni…	K00232+K01068+K03921+K07513+K10251+K10256+K10258+K10703
Folate biosynthesis	ko00790	unigene-103908.0;unigene-109822.0;unigene-2216.0;unigene-26276.0;unigene-26277.0;unigene-41197.0;unigene-43956.0;unigene-6332.0;unigene-70388.0;unigene-74783.0;unigene-75184.0;unigene-20838.0;unigene-21666.129327;unigene-21666.155155;unigene-21666.228741;unigene-21666.228742;unigene-21666.48048;unigene-38579.0;unigene-100915.0;unigene-13473.0;unigene-21666.26683;unigene-21666.80489;unigene-21666.…	K01113+K01307+K01495+K01633+K01930+K03635+K03637+K03639+K13941+K13950+K13998+K14652+K15376+K15631+K18482+K20457
Glycosylphosphatidylinositol (GPI)-anchor biosynthesis	ko00563	unigene-102681.0;unigene-21666.153831;unigene-21666.201909;unigene-21666.216978;unigene-21666.240207;unigene-21666.24572;unigene-21666.246831;unigene-21666.34890;unigene-21666.36848;unigene-21666.36849;unigene-21666.36850;unigene-21666.36852;unigene-21666.36853;unigene-21666.45955;unigene-38105.0;unigene-65176.0;unigene-21666.117186;unigene-21666.14688;unigene-21666.190199;unigene-21666.202060;un…	K03434+K03857+K03858+K03859+K03860+K03861+K05283+K05284+K05285+K05286+K05287+K05288+K05289+K05290+K05291+K05292+K05293+K05294+K05310+K07541+K07542+K09658
Valine, leucine and isoleucine biosynthesis	ko00290	unigene-105695.0;unigene-11217.0;unigene-114461.0;unigene-114461.1;unigene-13893.0;unigene-21666.131385;unigene-21666.134929;unigene-21666.138651;unigene-21666.138652;unigene-21666.152124;unigene-21666.152125;unigene-21666.152126;unigene-21666.152127;unigene-21666.152129;unigene-21666.155085;unigene-21666.173001;unigene-21666.177779;unigene-21666.53244;unigene-21666.63917;unigene-21666.66972;unig…	K00052+K00053+K00826+K01649+K01652+K01653+K01687+K01703+K01704+K01754
Fatty acid elongation	ko00062	unigene-21666.177848;unigene-21666.218395;unigene-21666.244357;unigene-21666.244358;unigene-21666.250112;unigene-21666.34592;unigene-21666.75988;unigene-24380.0;unigene-40026.0;unigene-4197.0;unigene-46179.0;unigene-61011.1;unigene-61916.0;unigene-69321.0;unigene-69321.1;unigene-75283.0;unigene-76256.0;unigene-80511.0;unigene-94776.0;unigene-102628.0;unigene-21666.148728;unigene-21666.164009;unig…	K01068+K01074+K07512+K10251+K10258+K10703+K15397
One carbon pool by folate	ko00670	unigene-100434.0;unigene-108267.0;unigene-21666.108743;unigene-21666.113479;unigene-21666.126175;unigene-21666.136498;unigene-21666.161804;unigene-21666.161805;unigene-21666.236313;unigene-21666.71324;unigene-21666.83101;unigene-21666.83103;unigene-32827.0;unigene-59366.0;unigene-59902.0;unigene-74462.0;unigene-79471.0;unigene-94125.0;unigene-97151.0;unigene-97152.0;unigene-102960.0;unigene-11197…	K00297+K00600+K00601+K00602+K00604+K00605+K01433+K01934+K01938+K13998
Other glycan degradation	ko00511	unigene-21666.117661;unigene-21666.125160;unigene-21666.131956;unigene-21666.228624;unigene-21666.245332;unigene-21666.30512;unigene-21666.3719;unigene-21666.49697;unigene-21666.49698;unigene-21666.49700;unigene-21666.82852;unigene-21666.82854;unigene-21666.82867;unigene-21666.82868;unigene-23686.0;unigene-85884.0;unigene-105357.0;unigene-21666.11174;unigene-21666.122028;unigene-21666.184462;unig…	K01190+K01191+K01206+K01227+K01444+K12309+K12373+K15923+K17108
AGE-RAGE signaling pathway in diabetic complications	ko04933	unigene-100305.0;unigene-103728.0;unigene-10757.0;unigene-21666.103220;unigene-21666.104480;unigene-21666.105494;unigene-21666.105496;unigene-21666.105497;unigene-21666.105499;unigene-21666.105689;unigene-21666.111878;unigene-21666.111881;unigene-21666.111882;unigene-21666.112544;unigene-21666.112589;unigene-21666.112717;unigene-21666.112721;unigene-21666.114194;unigene-21666.114195;unigene-21666…	K04371+K04392+K05857
Selenocompound metabolism	ko00450	unigene-10453.0;unigene-115535.0;unigene-115535.1;unigene-116199.0;unigene-13983.0;unigene-21666.120086;unigene-21666.148326;unigene-21666.205604;unigene-21666.205606;unigene-21666.205607;unigene-21666.205608;unigene-21666.205609;unigene-21666.205610;unigene-21666.205611;unigene-21666.205612;unigene-21666.205613;unigene-21666.205614;unigene-21666.205616;unigene-21666.205619;unigene-21666.205620;u…	K00384+K00549+K01739+K01760+K01761+K01874+K08247+K11717+K13811
Thiamine metabolism	ko00730	unigene-101589.0;unigene-101590.0;unigene-101591.0;unigene-101896.0;unigene-108331.0;unigene-44580.0;unigene-54650.0;unigene-69032.0;unigene-101413.0;unigene-110188.0;unigene-112197.0;unigene-112197.1;unigene-116357.0;unigene-116357.1;unigene-1324.0;unigene-14057.0;unigene-15029.0;unigene-19516.0;unigene-21666.115234;unigene-21666.122623;unigene-21666.123354;unigene-21666.126031;unigene-21666.126…	K00878+K00939+K00949+K01662+K03146+K03147+K04487+K06949+K14153+K20896+K22911
Ether lipid metabolism	ko00565	unigene-103796.0;unigene-106921.0;unigene-109698.0;unigene-21666.103765;unigene-21666.103768;unigene-21666.103769;unigene-21666.103770;unigene-21666.103771;unigene-21666.103788;unigene-21666.103789;unigene-21666.103792;unigene-21666.107103;unigene-21666.114301;unigene-21666.120382;unigene-21666.133395;unigene-21666.150873;unigene-21666.153394;unigene-21666.155127;unigene-21666.156129;unigene-2166…	K00993+K01047+K01114+K01115+K13510+K13519+K14674+K16860
Glycosaminoglycan degradation	ko00531	unigene-21666.100946;unigene-21666.100948;unigene-21666.100949;unigene-21666.100950;unigene-21666.100951;unigene-21666.100952;unigene-21666.100953;unigene-21666.111139;unigene-21666.111140;unigene-21666.111141;unigene-21666.123265;unigene-21666.144243;unigene-21666.164991;unigene-21666.168786;unigene-21666.175547;unigene-21666.187430;unigene-21666.187431;unigene-21666.192037;unigene-21666.214806;…	K01205+K07964+K10532+K12309+K12373
Nicotinate and nicotinamide metabolism	ko00760	unigene-113139.0;unigene-113139.1;unigene-21666.89410;unigene-69425.0;unigene-71667.0;unigene-71667.1;unigene-21666.143879;unigene-21666.163462;unigene-21666.189237;unigene-21666.189238;unigene-21666.189239;unigene-21666.205538;unigene-21666.205539;unigene-21666.205540;unigene-21666.205542;unigene-21666.212633;unigene-21666.221774;unigene-21666.225150;unigene-21666.225153;unigene-21666.225154;uni…	K00278+K00763+K00767+K00858+K01081+K01240+K01950+K03426+K03517+K03787+K06210
Cutin, suberine and wax biosynthesis	ko00073	unigene-101479.0;unigene-113846.0;unigene-12044.0;unigene-21666.171332;unigene-21666.210779;unigene-21666.222708;unigene-35584.0;unigene-43067.0;unigene-46484.0;unigene-50788.0;unigene-54.0;unigene-5673.0;unigene-64555.0;unigene-64800.0;unigene-64800.1;unigene-64800.2;unigene-64800.3;unigene-64800.4;unigene-75779.0;unigene-91562.0;unigene-99329.0;unigene-104508.0;unigene-105408.0;unigene-21666.18…	K13356+K15398+K15400+K15401+K15402+K15403+K15404+K17991+K20495
Isoquinoline alkaloid biosynthesis	ko00950	unigene-107205.0;unigene-109234.0;unigene-110634.0;unigene-111883.0;unigene-115041.0;unigene-11513.0;unigene-1644.0;unigene-18568.0;unigene-21666.134221;unigene-21666.135244;unigene-21666.147778;unigene-21666.151807;unigene-21666.164448;unigene-21666.164449;unigene-21666.164450;unigene-21666.169821;unigene-21666.185084;unigene-21666.192430;unigene-21666.196531;unigene-21666.204639;unigene-21666.2…	K00276+K00422+K00811+K00815+K01593+K14454+K14455+K15849
Vitamin B6 metabolism	ko00750	unigene-102526.0;unigene-102526.1;unigene-18166.0;unigene-21666.153374;unigene-21666.153376;unigene-21666.16148;unigene-21666.169619;unigene-21666.19051;unigene-21666.206890;unigene-21666.228411;unigene-21666.228412;unigene-21666.248898;unigene-21666.248938;unigene-21666.27111;unigene-21666.7281;unigene-21666.7282;unigene-21666.7283;unigene-21666.7284;unigene-21666.7285;unigene-21666.7286;unigene…	K00275+K00831+K00868+K01733+K05275+K06215+K08681+K13248
Other types of O-glycan biosynthesis	ko00514	unigene-21666.3255;unigene-21666.3256;unigene-46.0;unigene-46662.0;unigene-86996.0;unigene-113220.0;unigene-113220.1;unigene-115131.0;unigene-115151.0;unigene-21666.10064;unigene-21666.102070;unigene-21666.109080;unigene-21666.109081;unigene-21666.119630;unigene-21666.119632;unigene-21666.120007;unigene-21666.120277;unigene-21666.120278;unigene-21666.120279;unigene-21666.121465;unigene-21666.1220…	K03691+K09667+K20781+K20782+K20783+K20784
Riboflavin metabolism	ko00740	unigene-110615.0;unigene-21666.151949;unigene-21666.228117;unigene-21666.243192;unigene-23538.0;unigene-67596.0;unigene-78305.0;unigene-95312.0;unigene-21666.114155;unigene-21666.114156;unigene-21666.114157;unigene-21666.131240;unigene-21666.133658;unigene-21666.148308;unigene-21666.148309;unigene-21666.148462;unigene-21666.148463;unigene-21666.167938;unigene-21666.170333;unigene-21666.178828;uni…	K00793+K00794+K00861+K11752+K14379+K14652+K18453+K20860+K20884+K22912+K22949
Sesquiterpenoid and triterpenoid biosynthesis	ko00909	unigene-110545.0;unigene-16672.0;unigene-21666.219071;unigene-21666.34561;unigene-21666.34562;unigene-21666.34563;unigene-21666.34564;unigene-21666.34565;unigene-21666.34566;unigene-21666.34567;unigene-21666.34568;unigene-21666.34570;unigene-21666.34571;unigene-21666.36884;unigene-21666.36885;unigene-21666.36886;unigene-21666.8806;unigene-21666.8807;unigene-256.0;unigene-35096.0;unigene-46013.0;u…	K00511+K00801+K15891+K19010+K19011
Brassinosteroid biosynthesis	ko00905	unigene-105532.0;unigene-108672.0;unigene-21666.97156;unigene-3142.0;unigene-35094.0;unigene-6593.0;unigene-67089.0;unigene-78116.0;unigene-85120.0;unigene-103275.0;unigene-13959.0;unigene-21666.119458;unigene-21666.119459;unigene-21666.144011;unigene-21666.153827;unigene-21666.154284;unigene-21666.163857;unigene-21666.163864;unigene-21666.163865;unigene-21666.169093;unigene-21666.199074;unigene-…	K09587+K09588+K09589+K09590+K09591+K15639+K20623
Stilbenoid, diarylheptanoid and gingerol biosynthesis	ko00945	unigene-100735.0;unigene-105775.0;unigene-106993.0;unigene-106993.1;unigene-107501.0;unigene-11104.0;unigene-21041.0;unigene-21666.142405;unigene-21666.148148;unigene-21666.148149;unigene-21666.148150;unigene-21666.173303;unigene-21666.181840;unigene-21666.181843;unigene-21666.181855;unigene-21666.32388;unigene-21666.36581;unigene-21666.37803;unigene-21666.88567;unigene-21666.88568;unigene-21666.…	K00487+K00588+K09754+K13065+K16040+K17212
C5-Branched dibasic acid metabolism	ko00660	unigene-105695.0;unigene-11217.0;unigene-114461.0;unigene-114461.1;unigene-13893.0;unigene-21666.131385;unigene-21666.134929;unigene-21666.138651;unigene-21666.138652;unigene-21666.152124;unigene-21666.152125;unigene-21666.152126;unigene-21666.152127;unigene-21666.152129;unigene-21666.155085;unigene-21666.173001;unigene-21666.177779;unigene-21666.53244;unigene-21666.63917;unigene-21666.66972;unig…	K00052+K01652+K01653+K01703+K01704
Zeatin biosynthesis	ko00908	unigene-108574.0;unigene-108574.1;unigene-108574.2;unigene-109487.0;unigene-110964.0;unigene-111089.0;unigene-11252.0;unigene-21666.10186;unigene-21666.111395;unigene-21666.13557;unigene-21666.1556;unigene-21666.183434;unigene-21666.183435;unigene-21666.186229;unigene-21666.186230;unigene-21666.186231;unigene-21666.19813;unigene-21666.2154;unigene-21666.35206;unigene-21666.41524;unigene-21666.520…	K00279+K00791+K10717+K10760+K13495+K13496
Monoterpenoid biosynthesis	ko00902	unigene-21666.156504;unigene-21666.156505;unigene-21666.168909;unigene-21666.184681;unigene-21666.248699;unigene-21666.6286;unigene-21666.82290;unigene-47345.0;unigene-104800.0;unigene-105938.0;unigene-106912.0;unigene-108988.0;unigene-108988.1;unigene-108988.2;unigene-113012.0;unigene-113252.1;unigene-113850.0;unigene-115145.0;unigene-11919.0;unigene-15556.0;unigene-2103.0;unigene-21666.101229;u…	K15086+K15095+K21373+K21374
Taurine and hypotaurine metabolism	ko00430	unigene-21666.19594;unigene-21666.215381;unigene-21666.222074;unigene-21666.22963;unigene-21666.232539;unigene-21666.34257;unigene-21666.34259;unigene-21666.34260;unigene-21666.34262;unigene-21666.34263;unigene-21666.34264;unigene-30146.0;unigene-111424.0;unigene-113996.0;unigene-13941.0;unigene-16962.0;unigene-21666.106828;unigene-21666.106829;unigene-21666.112366;unigene-21666.123675;unigene-21…	K00681+K01580+K10712+K18592
Sulfur relay system	ko04122	unigene-21666.110783;unigene-21666.110785;unigene-21666.142293;unigene-21666.143811;unigene-21666.152595;unigene-21666.158161;unigene-21666.158162;unigene-21666.158163;unigene-21666.158164;unigene-21666.158165;unigene-21666.158166;unigene-21666.158168;unigene-21666.158169;unigene-21666.166119;unigene-21666.18386;unigene-21666.189187;unigene-21666.189188;unigene-21666.189189;unigene-21666.211670;u…	K01011+K03635+K03637+K03639+K04487+K11996+K12161+K14168+K14169+K21232
Arachidonic acid metabolism	ko00590	unigene-105399.0;unigene-21666.104713;unigene-21666.111850;unigene-21666.120968;unigene-21666.122316;unigene-21666.12672;unigene-21666.12673;unigene-21666.127479;unigene-21666.130305;unigene-21666.134908;unigene-21666.141297;unigene-21666.145473;unigene-21666.149659;unigene-21666.149660;unigene-21666.153730;unigene-21666.155579;unigene-21666.155580;unigene-21666.158180;unigene-21666.159448;unigen…	K00432+K01047+K01254+K05309+K14674+K18592
Glycosphingolipid biosynthesis - globo and isoglobo series	ko00603	unigene-21666.100522;unigene-21666.100523;unigene-21666.185415;unigene-21666.191534;unigene-21666.205506;unigene-21666.205786;unigene-21666.71081;unigene-10004.0;unigene-100427.0;unigene-100427.1;unigene-100427.2;unigene-107007.0;unigene-21666.116352;unigene-21666.138046;unigene-21666.141354;unigene-21666.157211;unigene-21666.164015;unigene-21666.167161;unigene-21666.167162;unigene-21666.167163;u…	K01988+K07407+K12373
Linoleic acid metabolism	ko00591	unigene-108317.2;unigene-21666.101466;unigene-21666.101467;unigene-21666.101468;unigene-21666.101471;unigene-21666.101472;unigene-21666.101473;unigene-21666.101474;unigene-21666.101475;unigene-21666.101478;unigene-21666.116446;unigene-21666.116447;unigene-21666.116448;unigene-21666.118722;unigene-21666.118724;unigene-21666.129540;unigene-21666.133369;unigene-21666.133371;unigene-21666.133372;unig…	K00454+K01047+K14674+K15718
Lysine biosynthesis	ko00300	unigene-100674.0;unigene-21666.210300;unigene-67612.0;unigene-21666.19164;unigene-21666.19251;unigene-21666.211195;unigene-21666.219652;unigene-21666.223741;unigene-21666.23762;unigene-21666.247759;unigene-21666.247762;unigene-21666.60154;unigene-21666.8396;unigene-21666.8398;unigene-3239.0;unigene-55565.0;unigene-86329.0;unigene-94099.0;unigene-94099.1;unigene-94099.2;unigene-94099.3;unigene-940…	K00133+K00215+K00928+K01586+K01714+K01778+K10206+K12524
Phosphonate and phosphinate metabolism	ko00440	unigene-100776.0;unigene-105891.0;unigene-109395.1;unigene-109395.2;unigene-21666.110310;unigene-21666.163323;unigene-21666.163325;unigene-21666.163326;unigene-21666.163327;unigene-21666.163330;unigene-21666.163331;unigene-21666.163333;unigene-21666.163337;unigene-21666.163338;unigene-21666.183893;unigene-21666.183894;unigene-21666.183895;unigene-21666.184708;unigene-21666.19390;unigene-21666.213…	K00967+K00968+K00993
Glycosphingolipid biosynthesis - ganglio series	ko00604	unigene-102470.0;unigene-21666.113403;unigene-21666.13924;unigene-21666.161388;unigene-21666.166650;unigene-21666.166651;unigene-21666.166654;unigene-21666.171096;unigene-21666.172899;unigene-21666.185961;unigene-21666.202661;unigene-21666.202713;unigene-21666.205185;unigene-21666.224422;unigene-21666.235297;unigene-21666.235300;unigene-21666.235302;unigene-21666.235303;unigene-21666.235304;unige…	K12309+K12373
Non-homologous end-joining	ko03450	unigene-110232.0;unigene-32810.0;unigene-93190.0;unigene-96813.0;unigene-96813.1;unigene-96814.0;unigene-21666.103650;unigene-21666.103651;unigene-21666.103652;unigene-21666.107912;unigene-21666.107913;unigene-21666.107914;unigene-21666.107915;unigene-21666.107916;unigene-21666.112825;unigene-21666.117513;unigene-21666.141164;unigene-21666.141165;unigene-21666.141166;unigene-21666.141167;unigene-…	K03512+K04799+K10777+K10865+K10866+K10884+K10885+K10886
Monobactam biosynthesis	ko00261	unigene-100674.0;unigene-21666.210300;unigene-67612.0;unigene-21666.19164;unigene-21666.19251;unigene-21666.211195;unigene-21666.219652;unigene-21666.223741;unigene-21666.23762;unigene-21666.247759;unigene-21666.247762;unigene-21666.60154;unigene-21666.8396;unigene-21666.8398;unigene-3239.0;unigene-55565.0;unigene-86329.0;unigene-94099.0;unigene-94099.1;unigene-94099.2;unigene-94099.3;unigene-940…	K00133+K00215+K00928+K01714+K12524+K13811
Synthesis and degradation of ketone bodies	ko00072	unigene-21666.116881;unigene-21666.117429;unigene-21666.12518;unigene-21666.126448;unigene-21666.134737;unigene-21666.134791;unigene-21666.143541;unigene-21666.15361;unigene-21666.161739;unigene-21666.164574;unigene-21666.164751;unigene-21666.172452;unigene-21666.172454;unigene-21666.186561;unigene-21666.204159;unigene-21666.213867;unigene-21666.226541;unigene-21666.233507;unigene-21666.235455;un…	K00626+K01640+K01641
Flavone and flavonol biosynthesis	ko00944	unigene-100238.0;unigene-100395.0;unigene-21666.101631;unigene-21666.11418;unigene-21666.160436;unigene-21666.160439;unigene-21666.160448;unigene-21666.168059;unigene-21666.174833;unigene-21666.194265;unigene-21666.199507;unigene-21666.208589;unigene-21666.208590;unigene-21666.212975;unigene-21666.22429;unigene-21666.236465;unigene-21666.240126;unigene-21666.248753;unigene-21666.248755;unigene-21…	K05280+K22771+K22772
Lipoic acid metabolism	ko00785	unigene-101675.0;unigene-106009.0;unigene-21666.119;unigene-21666.155498;unigene-21666.155508;unigene-21666.155514;unigene-21666.155516;unigene-21666.155517;unigene-21666.155528;unigene-21666.155544;unigene-21666.155545;unigene-21666.155546;unigene-21666.155547;unigene-21666.155548;unigene-21666.155549;unigene-21666.156694;unigene-21666.158050;unigene-21666.172653;unigene-21666.182111;unigene-216…	K03644+K03801
Betalain biosynthesis	ko00965	unigene-112881.0;unigene-113704.0;unigene-113704.1;unigene-113704.2;unigene-113858.0;unigene-113858.1;unigene-113858.2;unigene-113858.3;unigene-114056.0;unigene-115980.0;unigene-115981.0;unigene-11941.0;unigene-17911.0;unigene-27399.0;unigene-2748.0;unigene-30706.0;unigene-61889.0;unigene-64149.0;unigene-8279.0;unigene-14114.0;unigene-21666.139326;unigene-21666.164955;unigene-21666.164956;unigene…	K01593+K15777
Glucosinolate biosynthesis	ko00966	unigene-107681.0;unigene-107782.0;unigene-110117.1;unigene-114010.0;unigene-1518.0;unigene-19703.0;unigene-21666.118336;unigene-21666.118339;unigene-21666.118341;unigene-21666.118342;unigene-21666.118772;unigene-21666.122943;unigene-21666.142047;unigene-21666.173525;unigene-21666.193029;unigene-21666.193030;unigene-21666.207831;unigene-21666.228329;unigene-21666.248837;unigene-21666.248838;unigen…	K01703
Vancomycin resistance	ko01502	unigene-109368.0;unigene-109368.2;unigene-17999.0;unigene-21666.231387;unigene-21666.231388;unigene-21666.248532;unigene-21666.248534;unigene-21666.248535;unigene-21666.248536;unigene-21666.248537;unigene-21666.248538;unigene-21666.248540;unigene-21666.248542;unigene-21666.248543;unigene-21666.248544;unigene-21666.248545;unigene-21666.248546;unigene-21666.35589;unigene-21666.35590;unigene-21666.3…	K01000+K02563
Caffeine metabolism	ko00232	unigene-21666.133787;unigene-21666.250326;unigene-86780.0;unigene-100266.0;unigene-100267.0;unigene-100268.0;unigene-104736.0;unigene-11794.0;unigene-13595.0;unigene-19014.0;unigene-21666.226965;unigene-34190.0;unigene-34190.1;unigene-65101.1;unigene-65101.2;unigene-65101.3;unigene-65101.4;unigene-67765.0;unigene-79169.0;unigene-83486.0;unigene-97632.0	K00106+K00365
Biosynthesis of secondary metabolites - other antibiotics	ko00998	unigene-21666.114229;unigene-21666.114230;unigene-21666.114231;unigene-21666.118255;unigene-21666.118256;unigene-21666.118758;unigene-21666.125515;unigene-21666.159710;unigene-21666.166629;unigene-21666.166630;unigene-21666.200500;unigene-21666.44511;unigene-21666.69512;unigene-21666.80038;unigene-21666.80039;unigene-21666.80040;unigene-21666.93686	K21568
Glycosphingolipid biosynthesis - lacto and neolacto series	ko00601	unigene-21666.100522;unigene-21666.100523;unigene-21666.185415;unigene-21666.191534;unigene-21666.205506;unigene-21666.205786;unigene-21666.71081	K01988
