# Supplementary material for: RNA-seq and phytohormone analysis reveals the culm color variation of Bambusa oldhamii Munro
Source: PeerJ. 2022 Jan 13;10:e12796. doi: 10.7717/peerj.12796 (PMC8761368; doi:10.7717/peerj.12796)
Supplement: Supplemental Information 9 [file peerj-10-12796-s009.xls]

## Sheet: Sheet1
ID	cluster	HLZ_1(FPKM)	HLZ_2(FPKM)	HLZ_3(FPKM)	LZ_1(FPKM)	LZ_2(FPKM)	LZ_3(FPKM)
unigene-21666.106527	1	3.52	6	3.76	64.98	5.78	33.24
unigene-21666.122773	1	70.36	61.28	112.37	240.24	162.21	143.56
unigene-21666.128797	1	2.38	4.26	3.84	13.76	6.81	128.22
unigene-21666.134631	1	4.74	4.5	6.56	65.35	5.94	43.24
unigene-21666.151243	1	11.69	16.73	15.79	34.35	26.82	29.59
unigene-21666.2309	1	10.21	5.63	13.47	26.58	35.86	38.02
unigene-21666.69211	1	3.61	4.47	5.7	30.38	8.03	40.6
unigene-21666.94332	1	9.09	9.94	12.34	21.66	18.92	26.25
unigene-21666.123476	2	1869.24	3758.22	4822.19	10193	8874.06	6188.39
unigene-112803.0	3	0	0	0	0.43	6.26	26.98
unigene-21666.100854	3	0	0	0	1.39	5.5	7.44
unigene-21666.119447	3	0.02	0.01	0	0.1	7.83	12.02
unigene-21666.120939	3	0	0	0	1.19	11.25	5.33
unigene-21666.153137	3	0	0	0	1.17	5.4	4.91
unigene-21666.162547	3	0	0.21	0.46	1.25	13.88	9.05
unigene-21666.238461	3	2.23	0.4	1.02	3.08	25.85	19.38
unigene-21666.75914	3	0	0	0	4.62	13.68	7.31
unigene-5611.0	3	0.52	0.37	0	2.87	6.07	8.12
unigene-21666.135267	4	4.87	4.57	7.06	14.69	11.07	11.13
unigene-21666.136688	4	4.57	5.84	6.85	13.3	12.89	10.58
unigene-21666.151555	4	3.58	3.5	5.82	9.59	8.18	9.5
unigene-21666.163345	4	3.05	1.58	3.81	10.62	11.93	12.97
unigene-21666.206967	4	4.91	4.18	4.02	14.26	8.02	9.31
unigene-21666.245522	4	3.07	2.04	3.8	7.94	6.79	6.87
unigene-21666.62310	4	2.89	3.25	1.69	7.23	9.06	7.75
unigene-21666.79484	4	3.56	4.27	4.96	9.74	11.55	12.1
unigene-55887.2	4	4.7	4.83	4.74	9.52	8.57	10.92
unigene-104145.0	5	0.09	0	0	2.21	0.56	0.91
unigene-115886.1	5	0	0	0	0.69	0.25	0.81
unigene-2150.0	5	0.03	0	0.02	1.42	0.9	0.96
unigene-21666.10583	5	0	0	0	1	0.22	0.54
unigene-21666.110540	5	0	0	0	0.55	0.35	0.19
unigene-21666.111662	5	0	0	0	2.43	0.73	0.39
unigene-21666.116988	5	0	0	0	0.56	0.95	0.52
unigene-21666.117220	5	0	0	0	0.48	0.2	0.71
unigene-21666.118072	5	0	0	0	0.8	0.65	0.61
unigene-21666.123452	5	0	0	0	1.79	1.24	0.89
unigene-21666.126594	5	0	0	0	0.73	0.18	0.33
unigene-21666.135774	5	0	0	0	1.17	0.4	1.02
unigene-21666.137096	5	0.24	0.16	0.19	0.76	1.24	0.91
unigene-21666.143559	5	0	0	0	1.03	0.96	0.62
unigene-21666.152817	5	0.24	0.19	0.28	0.79	0.88	1.05
unigene-21666.157395	5	0	0	0	0.71	0.99	1.11
unigene-21666.157471	5	0	0	0	1.98	1.62	0.3
unigene-21666.170996	5	0	0	0	0.18	0.28	0.33
unigene-21666.174244	5	0	0	0	0.82	1.06	0.49
unigene-21666.182995	5	0	0	0	0.96	0.78	0.63
unigene-21666.184530	5	0.07	0.1	0.19	0.94	0.94	0.67
unigene-21666.191728	5	0	0.01	0.03	0.13	0.79	1.24
unigene-21666.194916	5	0	0	0	1.1	0.25	1.12
unigene-21666.201092	5	0	0	0	0.58	0.26	0.39
unigene-21666.219138	5	0	0	0	0.25	0.32	0.33
unigene-21666.221191	5	0	0	0	0.47	0.72	0.43
unigene-21666.227036	5	0	0	0	1.25	0.52	0.23
unigene-21666.229457	5	0	0	0	0.44	0.9	1.47
unigene-21666.229663	5	0	0	0	0.07	0.62	0.59
unigene-21666.23092	5	0	0	0	0.21	0.77	0.75
unigene-21666.231817	5	0	0	0	0.47	0.1	1.89
unigene-21666.239597	5	0.08	0.02	0.04	1.05	0.72	1.06
unigene-21666.241021	5	0.09	0.01	0	1.43	0.95	1.32
unigene-21666.244566	5	0	0	0	1.41	0.84	0.56
unigene-21666.27755	5	0	0.05	0	0.83	0.76	1.21
unigene-21666.2904	5	0	0	0	0.45	0.92	0.55
unigene-21666.32461	5	0	0	0	1.39	0.17	0.51
unigene-21666.37180	5	0	0.04	0	0.54	1.33	0.52
unigene-21666.39226	5	0	0	0	0.3	0.14	0.99
unigene-21666.41135	5	0	0	0	0.66	0.48	0.73
unigene-21666.43062	5	0	0	0	1.2	1.08	0.61
unigene-21666.45985	5	0	0.06	0	0.48	0.8	0.97
unigene-21666.51130	5	0	0	0.02	0.98	1.06	1.23
unigene-21666.5926	5	0	0	0	0.7	1.23	0.56
unigene-21666.6440	5	0	0	0	0.19	0.39	0.46
unigene-21666.74247	5	0	0	0	0.97	1.04	0.21
unigene-21666.83259	5	0	0	0	0.42	0.99	0.32
unigene-21666.9034	5	0.02	0	0	0.88	0.57	1.01
unigene-21666.91895	5	0	0	0	1.18	1.42	0.26
unigene-21666.93366	5	0	0.01	0	1.28	0.53	1.56
unigene-21666.93536	5	0	0	0	0.39	0.71	0.9
unigene-21666.969	5	0	0	0	0.92	0.39	1.46
unigene-41998.0	5	0	0	0	0.26	1.13	1.16
unigene-42011.0	5	0	0	0.03	0.53	0.69	0.9
unigene-42417.0	5	0	0	0	0.98	1.17	1.01
unigene-43499.0	5	0	0	0	0.74	0.68	1.37
unigene-48118.0	5	0	0	0	0.91	0.56	1.2
unigene-50642.0	5	0	0	0	0.72	1.43	0.45
unigene-52677.0	5	0	0	0	0.44	0.18	0.34
unigene-55057.0	5	0	0	0	0.55	0.76	0.76
unigene-55959.0	5	0	0	0	0.6	1.13	1.23
unigene-64883.0	5	0	0	0	0.22	0.89	0.48
unigene-65301.0	5	0	0	0	1.16	0.5	0.41
unigene-68888.0	5	0	0	0	1.34	0.46	1.1
unigene-74666.0	5	0	0	0	0.33	0.16	0.81
unigene-82092.1	5	0	0	0	0.58	1.12	1.23
unigene-112344.1	6	0	0	0	2.51	2.71	1.05
unigene-11281.0	6	0.06	0.28	0.43	1.33	2.04	4.73
unigene-113456.3	6	0	0	0.03	1.3	0.88	2.75
unigene-21666.106938	6	0.23	0.08	0	2.65	0.59	3.42
unigene-21666.112172	6	0	0	0	1.5	1.01	1.76
unigene-21666.124946	6	0	0	0.13	1.74	2.41	1.79
unigene-21666.1273	6	0	0.01	0	2.26	1.02	1.13
unigene-21666.127471	6	0	0	0	1.2	1.31	2.39
unigene-21666.131796	6	0.76	1.03	0.53	2.83	2.82	2.06
unigene-21666.135570	6	0	0	0	2.47	1.91	2.16
unigene-21666.13708	6	0	0	0	1.49	1.46	1.39
unigene-21666.137622	6	0.32	0.37	0.02	3.04	2.41	3.8
unigene-21666.142373	6	0	0	0.12	1.86	2.17	1.22
unigene-21666.149875	6	0	0	0	2.52	1.35	1.77
unigene-21666.167590	6	0.28	0.5	0.52	1.5	2.26	1.88
unigene-21666.172802	6	0.45	0.23	0.63	2.13	1.89	1.96
unigene-21666.179492	6	0.32	0.83	0.43	2.31	2.52	2.34
unigene-21666.194201	6	0	0	0	1.76	0.69	3.26
unigene-21666.209656	6	0	0	0	2.06	1.83	0.82
unigene-21666.214216	6	0	0	0	1.6	1.26	2.95
unigene-21666.216527	6	0.34	0.65	0.66	3.37	1.44	2.22
unigene-21666.226134	6	0	0	0.04	2.68	0.91	4.24
unigene-21666.230249	6	0.22	0.63	0.31	2.3	1.38	9.39
unigene-21666.232358	6	0	0	0	3.48	0.8	1.05
unigene-21666.33820	6	0.79	0.53	0.33	2.04	1.9	1.34
unigene-21666.55275	6	0.18	0.06	0.09	3.24	0.62	1.85
unigene-21666.58632	6	0.01	0.18	0.04	1.91	5.52	2.68
unigene-21666.6549	6	0	0.22	0	5.99	1.32	5.86
unigene-21666.82752	6	0.42	0.53	0.76	2.18	1.96	1.32
unigene-21666.91477	6	0.24	0.34	0.19	2.06	1.73	0.52
unigene-21666.96545	6	0.5	0.42	0.35	2.15	1.65	2.27
unigene-21666.97202	6	0	0	0	2.74	3.21	2.62
unigene-38286.0	6	0	0.27	0.04	1.71	1.76	2.22
unigene-66151.0	6	0.02	0	0	3.38	2.18	3.17
unigene-69473.0	6	0	0	0	1.72	2.68	3.44
unigene-75000.0	6	0	0	0	2.01	0.31	3.23
unigene-8395.0	6	0	0	0	1.87	1.4	2.06
unigene-107737.0	7	0.47	0.91	0.84	11.11	4.94	6.16
unigene-21666.100556	7	1.42	0.73	1.15	4.41	3.23	3.47
unigene-21666.107591	7	1.74	1.2	1.84	6.64	5.86	3.45
unigene-21666.148288	7	1.38	1.87	2.75	5.63	5.15	6.67
unigene-21666.173757	7	2.02	2.1	2.6	7.16	5.35	7.12
unigene-21666.179486	7	1.48	1.08	1.44	6.39	2.96	3.3
unigene-21666.182460	7	0.9	2.6	1.86	9.26	10.02	3.82
unigene-21666.21363	7	1.05	0.7	0.78	2.64	3.71	4.67
unigene-21666.8756	7	1.72	1.94	1.34	4.91	3.95	4.63
unigene-21666.98917	7	0.99	1.22	0.99	2.83	2.5	1.91
unigene-112110.0	8	1.06	0.68	0.46	11.61	1.12	81.75
unigene-21666.125725	8	0.35	1.11	0.41	22.16	1.38	18.01
unigene-21666.201523	8	0	0.36	0	5.76	1.92	46.7
unigene-21666.201527	8	0	0.17	0	4.61	0.52	54.92
unigene-56220.0	8	0.37	0	0.22	7.24	0.96	43.08
unigene-112792.2	9	0.06	0.39	0.15	6.74	9.66	0.61
unigene-21666.10649	9	0	0	0	4.21	10	0.92
unigene-21666.125669	9	0.05	0	0	4.54	4.67	4.03
unigene-21666.135408	9	0	0	0	2.58	6.01	1.1
unigene-21666.136397	9	0.02	0.22	0	11.33	1.84	1.21
unigene-21666.204466	9	0	0	0	4.65	5.59	1.79
unigene-21666.218036	9	0	0	0	3.63	3.59	0.52
unigene-21666.70283	9	0	0.07	0.16	3.45	8.91	0.26
unigene-21666.80700	9	1.02	0.19	0	21.43	19.58	0.76
unigene-100284.0	10	0.06	0.04	0	0.14	9.24	1.48
unigene-21666.111652	10	0	0	0	0.95	0.97	1.83
unigene-21666.114279	10	0.02	0	0	0.81	6.69	0.03
unigene-21666.118815	10	0	0	0	0.94	1.19	1.68
unigene-21666.135213	10	0	0	0	0.88	1.29	1.21
unigene-21666.136971	10	0.02	0	0	0.4	2.3	2.04
unigene-21666.163734	10	0	0	0	0.63	1.37	1.55
unigene-21666.169831	10	0	0.04	0.05	0.49	2.96	2.45
unigene-21666.177286	10	0	0	0	0.82	1.94	1.62
unigene-21666.180760	10	0	0	0	1.29	2.32	0.87
unigene-21666.182284	10	0	0	0	0.32	1.79	1.35
unigene-21666.185098	10	0	0	0	0.52	1.48	0.93
unigene-21666.19486	10	0	0	0	0.1	1.5	1.43
unigene-21666.196246	10	0	0	0	0.96	1.82	2.38
unigene-21666.210628	10	0	0.01	0	1.19	2.93	1.09
unigene-21666.212190	10	0	0	0	0.98	1.4	1.57
unigene-21666.215136	10	0	0	0	1.07	1.99	2.93
unigene-21666.233932	10	0	0	0	0.76	0.99	1.7
unigene-21666.3197	10	0	0	0	1.11	1.95	2.82
unigene-21666.38844	10	0	0	0	0.23	2.73	2.15
unigene-21666.52281	10	0.01	0	0.15	0.37	3.72	4.93
unigene-21666.57044	10	0	0	0	0.57	2.01	1.27
unigene-21666.6293	10	0.01	0	0	0.12	2.66	1.95
unigene-21666.73143	10	0.01	0	0	0.2	1.09	2.53
unigene-21666.74750	10	0.04	0	0	1.27	1.87	0.66
unigene-21666.77765	10	0	0	0	0.44	1.77	1.88
unigene-21666.81677	10	0	0.01	0.02	0.6	1.92	1.55
unigene-21666.81795	10	0	0	0	0.77	2.06	1.26
unigene-21666.94436	10	0	0	0	1.13	3.56	0.87
unigene-51559.0	10	0	0	0	0.39	1.27	2.85
unigene-56856.0	10	0	0	0	0.32	1.88	1.08
unigene-59912.0	10	0	0	0	0.48	1.61	1.45
unigene-65416.0	10	0	0	0	0.84	1.26	1.3
unigene-69447.0	10	0.16	0.27	0.07	0.66	2.48	2.76
unigene-80440.0	10	0	0	0	0.93	3.73	0.03
unigene-83932.0	10	0	0	0	0.35	1.85	0.97
