# Supplementary material for: RNA-seq and phytohormone analysis reveals the culm color variation of Bambusa oldhamii Munro
Source: PeerJ. 2022 Jan 13;10:e12796. doi: 10.7717/peerj.12796 (PMC8761368; doi:10.7717/peerj.12796)
Supplement: Supplemental Information 10 [file peerj-10-12796-s010.xls]

## Sheet: Sheet1
ID	custer	HLZ_1(FPKM)	HLZ_2(FPKM)	HLZ_3(FPKM)	LZ_1(FPKM)	LZ_2(FPKM)	LZ_3(FPKM)
unigene-21666.107961	1	91.72	116.79	95.35	53.66	41.57	48.16
unigene-21666.115569	1	49.16	66.83	50.63	24.92	13.44	21.09
unigene-21666.125526	1	128.08	138.78	174.85	55.83	23.99	60.57
unigene-21666.147127	1	49.16	48.76	52.76	19.24	17.2	12.58
unigene-21666.149531	1	64.52	302.44	126.2	16.73	17.26	11.57
unigene-21666.167280	1	47.43	65.47	58.81	12.38	10.43	17.76
unigene-21666.169778	1	94.2	101.78	133.21	58.51	25.83	25.85
unigene-21666.198767	1	41.49	42.02	39.14	20.66	19.5	17.68
unigene-21666.94994	1	72.35	96.12	62.75	33.27	17.31	24.22
unigene-21666.149530	2	5.47	13.09	8.75	1.37	0.53	0.69
unigene-21666.153505	2	1.83	59.64	17.61	0.6	0.25	0
unigene-21666.158340	2	5.22	30.19	5.41	1.5	0.47	0.53
unigene-21666.15994	2	3.8	19.61	3.26	0.85	0.42	1.18
unigene-21666.161645	2	3.4	87.59	9.63	1.97	1.27	3.31
unigene-21666.180578	2	4.57	22.58	4.4	1.1	0.97	1.11
unigene-21666.193044	2	3.43	50.9	30.63	1.3	1.32	0.95
unigene-21666.201638	2	3.22	20.79	5.8	1.64	0.55	1.34
unigene-21666.213246	2	3.06	30.64	3.26	0.6	1.04	0.52
unigene-21666.225108	2	1.87	15.96	7.15	0.75	1.19	0.78
unigene-21666.233474	2	6.59	18.45	5.81	2.22	0.42	0.4
unigene-21666.71578	2	11.34	17.11	15.84	0.2	0	0.36
unigene-21666.96694	2	2.05	20.9	17.87	0	0.89	0
unigene-21666.97690	2	15.78	105.25	15.02	1.09	0.79	3.2
unigene-21666.99543	2	3.98	55.67	27.12	2.13	1.03	0.39
unigene-23736.0	2	3.15	24.7	1.64	0.31	0.06	0.18
unigene-91156.0	2	2.16	17.04	7.53	0	0	0
unigene-21666.125206	3	0.48	1.86	2.6	0	0	0
unigene-21666.136506	3	0.32	1.98	1.83	0	0	0
unigene-21666.139384	3	0.95	2.49	0.68	0	0	0
unigene-21666.143142	3	0.41	2.15	2.13	0	0	0
unigene-21666.144320	3	1.01	3.5	0.79	0	0.06	0.13
unigene-21666.150221	3	0.34	5.9	0.65	0	0	0
unigene-21666.150704	3	0.07	6.23	6.05	0	0	0
unigene-21666.182570	3	0.68	3.03	2.45	0	0.03	0.01
unigene-21666.183382	3	0.92	5.16	3.05	0	0	0.17
unigene-21666.197401	3	0.67	3.4	1.23	0	0	0
unigene-21666.210727	3	2.21	20.24	1	0	0	0
unigene-21666.219338	3	1.03	3.64	1.22	0.19	0.2	0.17
unigene-21666.233019	3	0.7	2.86	1.87	0	0	0
unigene-21666.30596	3	0.51	2.54	0.64	0	0	0
unigene-21666.31056	3	0.06	2.24	1.12	0	0	0
unigene-21666.41287	3	0.83	6.39	1.36	0	0.15	0
unigene-21666.68733	3	0.58	1.91	3.3	0	0	0.01
unigene-21666.8827	3	0.28	3.74	1.84	0	0.06	0
unigene-21666.93716	3	1.92	10.31	0.81	0.24	0	0.08
unigene-22925.0	3	0.7	2.22	1.08	0	0	0
unigene-54665.0	3	0.18	2.04	0.88	0.04	0	0
unigene-67891.0	3	0.56	2.75	0.72	0.08	0	0
unigene-114620.2	4	2.19	2.85	3.17	0	0	0
unigene-15935.0	4	2.38	6.48	5.01	0	0	0
unigene-21666.101272	4	5.23	3.11	3.46	0	0.35	0
unigene-21666.109007	4	5.61	4.77	5.12	0.84	0.38	1.4
unigene-21666.112830	4	5.69	1.95	4.15	0	0	0
unigene-21666.113598	4	4.48	3.8	5.8	0	0	0
unigene-21666.120672	4	1.93	1.78	4.64	0	0	0.01
unigene-21666.144630	4	1.36	3.26	2.8	0.86	0.54	0.72
unigene-21666.151362	4	3.4	2.5	3.97	0	0	0
unigene-21666.154176	4	1.81	2.39	2.22	0.74	0.68	0.67
unigene-21666.157945	4	4.7	1.93	2.43	0.39	0.14	0
unigene-21666.169789	4	1.41	2.5	4.12	0.29	0.18	0
unigene-21666.172337	4	1.65	5.47	3.23	0.28	0.37	0.21
unigene-21666.176139	4	1.77	6.97	2.91	0.5	0.29	0
unigene-21666.198603	4	1.96	3.19	2.74	0.65	0.32	0.6
unigene-21666.19884	4	7.84	3.76	3.06	0	0	0.15
unigene-21666.219239	4	3.46	1.4	8	0.28	0.12	0.34
unigene-21666.231610	4	2.74	2.57	1.66	0.85	0.9	0.89
unigene-21666.231685	4	4.55	3.77	3.49	0.14	0	0.22
unigene-21666.235582	4	4.12	4.15	8.72	0	0	0.11
unigene-21666.243851	4	4.04	5.12	7.61	0	0.71	0.15
unigene-21666.248220	4	2.33	11.44	1.46	0.52	0.15	0.26
unigene-21666.50263	4	3.87	4.82	4.8	0.47	1.08	0.97
unigene-21666.50809	4	2.38	1.88	3.58	0.7	0.1	0.13
unigene-21666.64902	4	3.81	4.24	3.78	0.4	0.72	0.51
unigene-21666.79592	4	2.36	4.65	2.77	0.82	0.29	0.43
unigene-21666.83174	4	5.4	4.85	4.12	0	0	0
unigene-21666.87725	4	4.4	3.03	4.22	0.48	0.64	0.53
unigene-21666.89351	4	8.75	4.37	3.49	0	0	0
unigene-21666.93758	4	4.74	5.15	2.83	0.49	0.67	0.99
unigene-21666.9876	4	2.93	2.53	4.99	0.44	0.99	0.73
unigene-29785.0	4	3.22	15.49	1.46	0.22	0	0.13
unigene-37125.0	4	4.14	2.92	2.62	1.05	1.26	1.26
unigene-43769.0	4	3.28	2.1	3.73	0.06	0.33	0.17
unigene-43885.0	4	3.17	5.79	1.71	0.32	0	0.41
unigene-49443.5	4	4.36	1.82	7.46	0	0.05	0.4
unigene-85579.0	4	3.1	2.02	3.02	0	0	0
unigene-88322.0	4	4.13	3.29	2.44	0	0.33	0
unigene-21666.113648	5	1434.86	2392.76	1382.39	860.21	146.76	339.23
unigene-21666.90795	5	2358.46	1152.13	708.81	474.1	30.51	71.93
unigene-100891.0	6	1.36	0.41	1.42	0	0	0
unigene-105707.1	6	1.12	0.98	0.7	0.07	0	0
unigene-11517.0	6	0.52	0.78	0.59	0	0	0
unigene-21666.102436	6	0.49	0.24	0.48	0	0	0
unigene-21666.104797	6	0.53	0.46	0.63	0	0	0
unigene-21666.110384	6	0.66	0.24	1.68	0	0	0
unigene-21666.110436	6	0.36	1.57	1.24	0	0.07	0
unigene-21666.11606	6	0.95	0.55	0.45	0	0	0
unigene-21666.116124	6	0.89	0.57	0.47	0	0	0
unigene-21666.12131	6	0.35	1.17	0.8	0	0	0
unigene-21666.121416	6	0.67	0.24	0.69	0	0	0
unigene-21666.126981	6	0.64	1.67	0.91	0	0	0
unigene-21666.127581	6	0.52	1.1	1.33	0	0	0
unigene-21666.12933	6	1.54	0.78	0.22	0	0	0
unigene-21666.136508	6	0.3	1.37	0.56	0	0	0
unigene-21666.141335	6	0.68	0.2	1.72	0	0	0
unigene-21666.143290	6	0.83	1.03	1.08	0	0	0
unigene-21666.147134	6	0.88	0.82	0.69	0	0	0
unigene-21666.149535	6	1.25	1.27	0.98	0	0	0.06
unigene-21666.170798	6	0.3	0.64	0.4	0	0	0
unigene-21666.170933	6	2.36	0.27	0.83	0	0	0
unigene-21666.181183	6	1.28	0.91	1.16	0.29	0.08	0.12
unigene-21666.192686	6	0.48	0.82	1.34	0	0	0
unigene-21666.194872	6	0.32	1.01	0.56	0	0	0
unigene-21666.195887	6	0.76	0.8	0.78	0	0	0
unigene-21666.196998	6	0.87	0.3	1.1	0	0	0
unigene-21666.19860	6	0.28	1.37	0.53	0	0	0
unigene-21666.201747	6	1.88	0.88	0.81	0	0	0
unigene-21666.211778	6	0.81	1.62	1.02	0	0	0
unigene-21666.212035	6	1.31	0.39	1.22	0	0	0
unigene-21666.214519	6	0.63	1.03	1.22	0	0	0
unigene-21666.216114	6	0.21	1.62	0.54	0	0	0
unigene-21666.221188	6	1.04	0.63	1.01	0	0	0
unigene-21666.225910	6	0.32	0.19	0.61	0	0	0
unigene-21666.229251	6	0.76	0.94	0.72	0	0	0
unigene-21666.230991	6	0.94	0.48	0.26	0	0	0
unigene-21666.250812	6	0.44	0.46	0.61	0	0	0
unigene-21666.25656	6	0.22	0.53	0.4	0	0	0
unigene-21666.26519	6	0.58	0.63	0.68	0	0	0
unigene-21666.32817	6	0.13	0.3	0.74	0	0	0
unigene-21666.35697	6	0.96	1.21	1.04	0.04	0	0
unigene-21666.42719	6	0.67	1.2	0.11	0	0	0.01
unigene-21666.44722	6	0.6	1.4	1.34	0	0	0.07
unigene-21666.45310	6	1.3	0.39	1.46	0	0	0
unigene-21666.45647	6	0.95	0.91	0.79	0	0	0
unigene-21666.47430	6	0.72	0.4	0.65	0	0	0.02
unigene-21666.52	6	0.39	0.6	0.38	0	0	0
unigene-21666.52130	6	0.88	1.56	0.24	0	0	0
unigene-21666.5523	6	0.95	0.67	1.2	0	0	0.05
unigene-21666.63545	6	0.7	0.35	1.29	0	0	0
unigene-21666.68687	6	0.8	0.64	0.27	0	0	0
unigene-21666.78241	6	0.41	1.21	0.5	0	0	0
unigene-21666.83873	6	1	0.4	1.02	0	0	0
unigene-21666.86045	6	0.96	1.35	0.81	0.14	0.02	0.05
unigene-21666.90109	6	0.07	0.75	0.23	0	0	0
unigene-21666.9343	6	0.81	0.66	0.71	0	0	0
unigene-21666.94074	6	0.63	1.03	1.06	0	0	0
unigene-21666.9593	6	0.79	1.02	0.85	0	0	0
unigene-21666.98709	6	0.36	0.19	0.3	0	0	0
unigene-21666.98927	6	0.4	0.26	1.22	0	0	0
unigene-36425.0	6	1.77	0.61	1.47	0	0	0
unigene-37713.0	6	0.62	1.23	1.11	0	0	0
unigene-38261.0	6	1.44	0.68	1.06	0	0	0
unigene-39477.3	6	1.1	0.72	0.54	0	0	0
unigene-50694.0	6	0.64	0.61	0.42	0	0	0
unigene-54902.0	6	0.31	0.57	0.44	0	0	0
unigene-5568.0	6	0.3	0.66	0.65	0	0	0
unigene-75858.10	6	0.41	0.57	0.72	0	0.02	0
unigene-83385.0	6	0.55	0.51	0.42	0.02	0	0
unigene-93970.0	6	0.5	0.59	0.25	0	0	0
unigene-95563.0	6	0.98	0.66	0.28	0	0	0.02
unigene-21666.100803	7	17.58	26.33	18.96	6.75	11.33	6.22
unigene-21666.104728	7	24.34	31.21	18.52	10.44	8.23	11.96
unigene-21666.110099	7	15.7	11.89	14.72	4.56	8.42	3.41
unigene-21666.122250	7	18.97	24.63	19.16	10.84	8.67	8.25
unigene-21666.138128	7	14.18	11.57	14.11	5.05	7.6	6.3
unigene-21666.151960	7	11.15	10.57	14	5.61	2.47	3.9
unigene-21666.167375	7	16.37	13.87	20.59	5.92	6	6.87
unigene-21666.179928	7	17.49	20.7	27.89	3.9	2.65	4.54
unigene-21666.181028	7	30.8	31.3	36.22	14.99	7.3	14.51
unigene-21666.183486	7	20.97	30.02	26.22	13.78	8.19	8.31
unigene-21666.190256	7	11.92	21.06	17.28	3.7	4.95	5.87
unigene-21666.191512	7	27.23	12.55	22.74	5.17	2.14	5.1
unigene-21666.199574	7	15.08	20.22	18.82	3.01	4.84	4
unigene-21666.202848	7	10.44	16.79	15.7	4.55	5.16	6.71
unigene-21666.218027	7	13.46	30.54	16.99	5.99	2.18	4.58
unigene-21666.27552	7	22.31	41.6	41.83	13.78	9.61	14.37
unigene-21666.48167	7	11.77	44.19	14.37	4.87	1.13	4.71
unigene-21666.71807	7	15.36	21.01	24.11	7.51	4	4.25
unigene-21666.87695	7	16.05	17.26	14.28	6.28	5.44	6.16
unigene-21666.94810	7	17.36	13.91	19.53	6.69	6.1	6.86
unigene-21666.94811	7	21.22	20.81	25.46	6.02	7	9.64
unigene-70085.0	7	17.67	41.91	28.91	10.78	4.1	5.71
unigene-100125.0	8	1.65	2.35	0.76	0	0	0
unigene-21666.107450	8	2.03	2.12	1.71	0.15	0.01	0.03
unigene-21666.116766	8	1.19	2.01	1.12	0	0	0
unigene-21666.120307	8	2.04	1.7	1.94	0.78	0.66	0.85
unigene-21666.126192	8	1.76	2.53	1.89	0.02	0	0.07
unigene-21666.134539	8	2.37	2.42	2.28	0	0	0
unigene-21666.144592	8	1.69	2.74	2.18	0.22	0.16	0
unigene-21666.145919	8	1.54	2.46	1.85	0.01	0	0
unigene-21666.148270	8	4.13	2.1	1.51	0	0.14	0.23
unigene-21666.155085	8	1.28	2.91	1.1	0	0	0
unigene-21666.164649	8	1.15	2.24	2.11	0.2	0.22	0.27
unigene-21666.16697	8	1.99	0.89	2.14	0	0	0
unigene-21666.194240	8	1.72	1.38	1.47	0	0	0
unigene-21666.194406	8	2.51	2.62	2.15	0	0	0
unigene-21666.200082	8	1.24	2.44	1.73	0.4	0.2	0.35
unigene-21666.211148	8	2.85	4.27	0.74	0	0	0
unigene-21666.212838	8	2.94	3.59	0.3	0	0.1	0
unigene-21666.21318	8	1.91	2.36	0.51	0	0	0
unigene-21666.213419	8	2.65	2.29	1.09	0	0	0
unigene-21666.23232	8	2.17	1.75	1.9	0	0	0.13
unigene-21666.232945	8	1.25	1.39	2.11	0	0	0
unigene-21666.245986	8	2.33	2.05	0.76	0.09	0	0
unigene-21666.37244	8	1.52	1.32	1.95	0.64	0.62	0.42
unigene-21666.38463	8	1.96	0.78	1.16	0.15	0.19	0.18
unigene-21666.38483	8	1.51	1.76	2.19	0.42	0.34	0.36
unigene-21666.50555	8	1.76	1.82	2.06	0	0	0
unigene-21666.51712	8	1.4	2.71	1.63	0.34	0.57	0.17
unigene-21666.57620	8	1.2	0.82	2.49	0	0	0
unigene-21666.60924	8	1.96	0.95	1.65	0	0	0
unigene-21666.6214	8	1.1	1.89	0.7	0	0	0
unigene-21666.82142	8	1.58	2.73	1.81	0	0	0
unigene-21666.85727	8	2.43	1.65	0.97	0	0	0
unigene-21666.94583	8	3.81	3.44	1.09	0	0	0
unigene-32003.0	8	1.79	2.81	1.07	0	0	0
unigene-34183.0	8	1.09	1.69	1.33	0.07	0	0
unigene-36333.0	8	2.64	2.23	2.26	0	0	0
unigene-42832.0	8	1.44	1.7	1.37	0.07	0	0
unigene-52864.0	8	0.75	1.64	1.67	0	0	0
unigene-57499.0	8	1.27	2.4	1.53	0	0.08	0
unigene-59003.0	8	2.18	0.76	1.32	0	0	0.08
unigene-61591.0	8	1.35	2.57	1.55	0.14	0.31	0.24
unigene-62540.0	8	1.8	2.54	1.44	0.41	0.16	0.33
unigene-74133.0	8	1.25	1.46	0.86	0	0	0
unigene-82473.0	8	3.15	2.52	0.55	0	0	0
unigene-21666.108859	9	7.07	0.56	6.45	0.39	0.25	0.12
unigene-21666.127025	9	4.8	0.87	3.21	0	0.08	0
unigene-21666.141343	9	2.58	0.66	2.84	0	0	0
unigene-21666.191811	9	13.54	0.3	4.75	0	0	0
unigene-21666.192898	9	3.56	0.27	1.32	0	0	0
unigene-21666.31989	9	2.04	0.1	2.18	0	0	0
unigene-21666.74173	9	3.78	0.53	4.06	0	0.02	0
unigene-62358.0	9	4.36	0.62	2.59	0.08	0	0
unigene-82669.0	9	2.31	0.2	1.81	0	0	0
unigene-21666.136527	10	6.48	6.8	3.77	2.4	1.78	2.13
unigene-21666.139074	10	4.81	7.97	3.76	1.63	0.48	0.75
unigene-21666.158224	10	11.37	14.77	7.27	3.69	3.39	2.89
unigene-21666.161214	10	4.62	9.02	5.46	1.8	0.66	1.78
unigene-21666.166463	10	11.55	9.66	14.62	2.46	1.6	0.12
unigene-21666.170342	10	6.93	5.55	4.08	2.06	2.19	1.65
unigene-21666.176981	10	3.25	6.2	4.94	1.81	1.33	0.92
unigene-21666.183873	10	3.77	3.63	3.76	1.77	1.25	1.4
unigene-21666.189691	10	7.34	7.34	3.01	1.59	0.82	1.27
unigene-21666.199573	10	4.83	6.44	9.69	0.89	0.92	1.19
unigene-21666.206949	10	7.94	10.17	7.76	3.16	2.99	2.9
unigene-21666.227595	10	8.72	9.86	12.05	2.99	3.97	4.12
unigene-21666.31010	10	7.03	13.76	10.54	2.11	0.85	1.7
unigene-21666.68133	10	12.99	10.35	8.83	3.04	1.76	2.37
unigene-21666.70889	10	7.53	4.96	6.49	2.34	1.1	1.07
unigene-21666.71801	10	10.19	7.79	9.85	2.62	2.05	2.97
unigene-21666.73775	10	8.6	6.5	6.11	1.74	1.14	0.85
unigene-21666.75386	10	6.18	9.34	8.34	3.33	4.12	2.97
unigene-21666.80568	10	4.64	5.67	4.07	2.08	1.95	2.01
unigene-21666.88751	10	6.64	7.74	5.35	1.64	1.12	1.48
unigene-21666.95932	10	5.31	3.96	5.56	0.64	1.57	1.47
unigene-21666.98177	10	7.91	6.94	5.66	3.22	2.64	3.5
unigene-21666.99880	10	9.27	9.17	11.44	2.9	3.96	4.92
unigene-52685.0	10	12.58	8.65	12.61	0.46	0	0.44
unigene-74139.0	10	15.04	20.82	17.05	3.61	0.58	1.24
