# Supplementary material for: RNA-seq and phytohormone analysis reveals the culm color variation of Bambusa oldhamii Munro
Source: PeerJ. 2022 Jan 13;10:e12796. doi: 10.7717/peerj.12796 (PMC8761368; doi:10.7717/peerj.12796)
Supplement: Supplemental Information 11 [file peerj-10-12796-s011.xls]

## Sheet: 20201209bioactin-corTest-result
gene_id	HLZ_1(FPKM)	HLZ_2(FPKM)	HLZ_3(FPKM)	LZ_1(FPKM)	LZ_2(FPKM)	LZ_3(FPKM)	HLZ_1(Relative expression)	HLZ_2(Relative expression)	HLZ_3(Relative expression)	LZ_1(Relative expression)	LZ_2(Relative expression)	LZ_3(Relative expression)	estimate	p.value
unigene-21666.15994(MYB)	3.8	19.61	3.26	0.85	0.42	1.18	1	5.42	1.19	0.6	0.57	0.5	0.99653	1.8e-05
unigene-21666.113648(phenylalanine ammonia-lyase)	1434.86	2392.76	1382.39	860.21	146.76	339.23	1.01	1.95	0.91	0.41	0.11	0.22	0.984754	0.000346905
unigene-21666.125526(anthranilate O-methyltransferase)	128.08	138.78	174.85	55.83	23.99	60.57	1	0.99	1.58	0.29	0.25	0.39	0.974958	0.000932823
unigene-21666.134631(SAUR)	4.74	4.5	6.56	65.35	5.94	43.24	1.02	0.5	0.67	3.36	0.77	2.27	0.987524	0.000232504
