# Supplementary material for: RNA-seq and phytohormone analysis reveals the culm color variation of Bambusa oldhamii Munro
Source: PeerJ. 2022 Jan 13;10:e12796. doi: 10.7717/peerj.12796 (PMC8761368; doi:10.7717/peerj.12796)
Supplement: Supplemental Information 12 [file peerj-10-12796-s012.xlsx]

## Sheet: Sheet 1
Ontology	ID	Description	Count	GeneRatio
Biological process	GO:0009987	cellular process	202	202/449
Biological process	GO:0008152	metabolic process	180	180/449
Biological process	GO:0050896	response to stimulus	98	98/449
Biological process	GO:0065007	biological regulation	96	96/449
Biological process	GO:0050789	regulation of biological process	86	86/449
Biological process	GO:0032501	multicellular organismal process	46	46/449
Biological process	GO:0032502	developmental process	46	46/449
Biological process	GO:0051179	localization	44	44/449
Biological process	GO:0023052	signaling	40	40/449
Biological process	GO:0071840	cellular component organization or biogenesis	36	36/449
Biological process	GO:0000003	reproduction	28	28/449
Biological process	GO:0022414	reproductive process	28	28/449
Biological process	GO:0051704	multi-organism process	25	25/449
Biological process	GO:0048518	positive regulation of biological process	22	22/449
Biological process	GO:0048519	negative regulation of biological process	16	16/449
Biological process	GO:0040007	growth	10	10/449
Biological process	GO:0002376	immune system process	7	7/449
Biological process	GO:0048511	rhythmic process	6	6/449
Biological process	GO:0008283	cell proliferation	2	2/449
Biological process	GO:0040011	locomotion	1	1/449
Biological process	GO:0098754	detoxification	1	1/449
Cellular component	GO:0005623	cell	243	243/449
Cellular component	GO:0044464	cell part	243	243/449
Cellular component	GO:0043226	organelle	177	177/449
Cellular component	GO:0016020	membrane	132	132/449
Cellular component	GO:0044425	membrane part	94	94/449
Cellular component	GO:0044422	organelle part	79	79/449
Cellular component	GO:0032991	protein-containing complex	38	38/449
Cellular component	GO:0031974	membrane-enclosed lumen	11	11/449
Cellular component	GO:0005576	extracellular region	9	9/449
Cellular component	GO:0030054	cell junction	8	8/449
Cellular component	GO:0055044	symplast	8	8/449
Cellular component	GO:0099080	supramolecular complex	7	7/449
Cellular component	GO:0009295	nucleoid	2	2/449
Cellular component	GO:0044421	extracellular region part	1	1/449
Molecular function	GO:0005488	binding	196	196/449
Molecular function	GO:0003824	catalytic activity	163	163/449
Molecular function	GO:0005215	transporter activity	27	27/449
Molecular function	GO:0140110	transcription regulator activity	16	16/449
Molecular function	GO:0060089	molecular transducer activity	11	11/449
Molecular function	GO:0005198	structural molecule activity	6	6/449
Molecular function	GO:0016209	antioxidant activity	5	5/449
Molecular function	GO:0098772	molecular function regulator	4	4/449
Molecular function	GO:0045735	nutrient reservoir activity	1	1/449
