# Supplementary material for: RNA-seq and phytohormone analysis reveals the culm color variation of Bambusa oldhamii Munro
Source: PeerJ. 2022 Jan 13;10:e12796. doi: 10.7717/peerj.12796 (PMC8761368; doi:10.7717/peerj.12796)
Supplement: Supplemental Information 13 [file peerj-10-12796-s013.xlsx]

## Sheet: Sheet1
Classification	Code	CodeFunction	geneCount
POORLY CHARACTERIZED	R	General function prediction only	57
CELLULAR PROCESSES AND SIGNALING	T	Signal transduction mechanisms	30
CELLULAR PROCESSES AND SIGNALING	O	Posttranslational modification, protein turnover, chaperones	27
POORLY CHARACTERIZED	S	Function unknown	17
INFORMATION STORAGE AND PROCESSING	K	Transcription	14
INFORMATION STORAGE AND PROCESSING	J	Translation, ribosomal structure and biogenesis	13
CELLULAR PROCESSES AND SIGNALING	U	Intracellular trafficking, secretion, and vesicular transport	10
METABOLISM	E	Amino acid transport and metabolism	10
METABOLISM	G	Carbohydrate transport and metabolism	10
METABOLISM	Q	Secondary metabolites biosynthesis, transport and catabolism	10
METABOLISM	I	Lipid transport and metabolism	9
METABOLISM	C	Energy production and conversion	7
CELLULAR PROCESSES AND SIGNALING	Z	Cytoskeleton	6
METABOLISM	P	Inorganic ion transport and metabolism	6
INFORMATION STORAGE AND PROCESSING	A	RNA processing and modification	5
INFORMATION STORAGE AND PROCESSING	L	Replication, recombination and repair	5
CELLULAR PROCESSES AND SIGNALING	D	Cell cycle control, cell division, chromosome partitioning	4
CELLULAR PROCESSES AND SIGNALING	V	Defense mechanisms	2
INFORMATION STORAGE AND PROCESSING	B	Chromatin structure and dynamics	2
CELLULAR PROCESSES AND SIGNALING	M	Cell wall/membrane/envelope biogenesis	1
CELLULAR PROCESSES AND SIGNALING	Y	Nuclear structure	1
