# Supplementary material for: RNA-seq and phytohormone analysis reveals the culm color variation of Bambusa oldhamii Munro
Source: PeerJ. 2022 Jan 13;10:e12796. doi: 10.7717/peerj.12796 (PMC8761368; doi:10.7717/peerj.12796)
Supplement: Supplemental Information 14 [file peerj-10-12796-s014.xlsx]

## Sheet: Sheet 1
Ontology	ID	Description	GeneRatio	BgRatio	pvalue	p.adjust	qvalue	geneID	Count	up	down
Cellular component	GO:0005663	DNA replication factor C complex	2/117	108/167039	0.0026774	0.0534449	0.032708	unigene-112344.1/unigene-21666.9034	2	0	2
Cellular component	GO:0034707	chloride channel complex	2/117	135/167039	0.00413995	0.0534449	0.032708	unigene-21666.135570/unigene-48118.0	2	0	2
Cellular component	GO:0034702	ion channel complex	2/117	136/167039	0.00419983	0.0534449	0.032708	unigene-21666.135570/unigene-48118.0	2	0	2
Cellular component	GO:1902495	transmembrane transporter complex	2/117	152/167039	0.0052121	0.0534449	0.032708	unigene-21666.135570/unigene-48118.0	2	0	2
Cellular component	GO:0000178	exosome (RNase complex)	2/117	183/167039	0.00745742	0.0534449	0.032708	unigene-21666.233932/unigene-55057.0	2	0	2
Cellular component	GO:1905354	exoribonuclease complex	2/117	183/167039	0.00745742	0.0534449	0.032708	unigene-21666.233932/unigene-55057.0	2	0	2
Cellular component	GO:0034709	methylosome	1/117	14/167039	0.00976195	0.0571018	0.034946	unigene-21666.143559	1	0	1
Cellular component	GO:0010009	cytoplasmic side of endosome membrane	1/117	16/167039	0.0111488	0.0571018	0.034946	unigene-55887.2	1	0	1
Cellular component	GO:1990351	transporter complex	2/117	236/167039	0.0121226	0.0571018	0.034946	unigene-21666.135570/unigene-48118.0	2	0	2
Cellular component	GO:0005657	replication fork	2/117	250/167039	0.0135207	0.0571018	0.034946	unigene-112344.1/unigene-21666.9034	2	0	2
Cellular component	GO:0034715	pICln-Sm protein complex	1/117	21/167039	0.0146074	0.0571018	0.034946	unigene-21666.143559	1	0	1
Cellular component	GO:0030119	AP-type membrane coat adaptor complex	2/117	273/167039	0.0159614	0.057195	0.0350031	unigene-21666.6293/unigene-21666.229457	2	0	2
Cellular component	GO:0005776	autophagosome	2/117	292/167039	0.0181086	0.0575647	0.0352293	unigene-21666.214216/unigene-21666.244566	2	0	2
Cellular component	GO:0009360	DNA polymerase III complex	1/117	27/167039	0.018742	0.0575647	0.0352293	unigene-21666.9034	1	0	1
Cellular component	GO:0005758	mitochondrial intermembrane space	2/117	314/167039	0.020738	0.0580663	0.0355363	unigene-21666.136397/unigene-21666.241021	2	0	2
Cellular component	GO:0031970	organelle envelope lumen	2/117	321/167039	0.0216061	0.0580663	0.0355363	unigene-21666.136397/unigene-21666.241021	2	0	2
Cellular component	GO:0030123	AP-3 adaptor complex	1/117	42/167039	0.0290033	0.0733613	0.0448967	unigene-21666.6293	1	0	1
Cellular component	GO:0000813	ESCRT I complex	1/117	66/167039	0.0452005	0.107979	0.0660826	unigene-21666.74750	1	0	1
Cellular component	GO:0042575	DNA polymerase complex	1/117	97/167039	0.065726	0.148748	0.0910333	unigene-21666.9034	1	0	1
Cellular component	GO:0042644	chloroplast nucleoid	1/117	130/167039	0.0870952	0.18488	0.113146	unigene-21666.135267	1	0	1
Cellular component	GO:0016363	nuclear matrix	1/117	135/167039	0.0902904	0.18488	0.113146	unigene-21666.123452	1	0	1
Cellular component	GO:0030131	clathrin adaptor complex	1/117	182/167039	0.119788	0.222415	0.136117	unigene-21666.229457	1	0	1
Cellular component	GO:0036452	ESCRT complex	1/117	185/167039	0.121639	0.222415	0.136117	unigene-21666.74750	1	0	1
Cellular component	GO:0043230	extracellular organelle	1/117	206/167039	0.134484	0.222415	0.136117	unigene-21666.74247	1	0	1
Cellular component	GO:0070062	extracellular exosome	1/117	206/167039	0.134484	0.222415	0.136117	unigene-21666.74247	1	0	1
Cellular component	GO:1903561	extracellular vesicle	1/117	206/167039	0.134484	0.222415	0.136117	unigene-21666.74247	1	0	1
Cellular component	GO:0042646	plastid nucleoid	1/117	224/167039	0.145345	0.224129	0.137166	unigene-21666.135267	1	0	1
Cellular component	GO:0034708	methyltransferase complex	1/117	225/167039	0.145944	0.224129	0.137166	unigene-21666.143559	1	0	1
Cellular component	GO:0034399	nuclear periphery	1/117	244/167039	0.157255	0.233171	0.142699	unigene-21666.123452	1	0	1
Cellular component	GO:0031901	early endosome membrane	1/117	261/167039	0.167249	0.239723	0.146709	unigene-55887.2	1	0	1
Cellular component	GO:0030118	clathrin coat	1/117	272/167039	0.173653	0.240873	0.147413	unigene-21666.229457	1	0	1
Cellular component	GO:0009295	nucleoid	1/117	283/167039	0.180008	0.241885	0.148033	unigene-21666.135267	1	0	1
Cellular component	GO:0005905	clathrin-coated pit	1/117	294/167039	0.186314	0.242773	0.148576	unigene-21666.229457	1	0	1
Cellular component	GO:0010494	cytoplasmic stress granule	1/117	311/167039	0.195966	0.244911	0.149884	unigene-21666.204466	1	0	1
Cellular component	GO:0005815	microtubule organizing center	1/117	317/167039	0.199346	0.244911	0.149884	unigene-21666.19486	1	0	1
Cellular component	GO:0048471	perinuclear region of cytoplasm	1/117	371/167039	0.229134	0.267548	0.163738	unigene-21666.33820	1	0	1
Cellular component	GO:0030665	clathrin-coated vesicle membrane	1/117	373/167039	0.230216	0.267548	0.163738	unigene-21666.32461	1	0	1
Cellular component	GO:0098562	cytoplasmic side of membrane	1/117	390/167039	0.239352	0.270845	0.165756	unigene-55887.2	1	0	1
Cellular component	GO:0005747	mitochondrial respiratory chain complex I	1/117	445/167039	0.268178	0.27585	0.168819	unigene-21666.241021	1	0	1
Cellular component	GO:0030964	NADH dehydrogenase complex	1/117	445/167039	0.268178	0.27585	0.168819	unigene-21666.241021	1	0	1
Cellular component	GO:0045271	respiratory chain complex I	1/117	445/167039	0.268178	0.27585	0.168819	unigene-21666.241021	1	0	1
Cellular component	GO:0098552	side of membrane	1/117	454/167039	0.272791	0.27585	0.168819	unigene-55887.2	1	0	1
Cellular component	GO:0000145	exocyst	1/117	460/167039	0.27585	0.27585	0.168819	unigene-21666.74247	1	0	1
Molecular function	GO:0008028	monocarboxylic acid transmembrane transporter activity	4/113	423/180523	0.000156401	0.0187681	0.0120182	unigene-21666.1273/unigene-21666.201092/unigene-51559.0/unigene-21666.136688	4	0	4
Molecular function	GO:0015245	fatty acid transmembrane transporter activity	2/113	64/180523	0.000763309	0.0457985	0.0293271	unigene-21666.1273/unigene-51559.0	2	0	2
Molecular function	GO:0005319	lipid transporter activity	3/113	450/180523	0.00294036	0.0983215	0.0629603	unigene-21666.127471/unigene-21666.1273/unigene-51559.0	3	0	3
Molecular function	GO:0090482	vitamin transmembrane transporter activity	2/113	147/180523	0.00392774	0.0983215	0.0629603	unigene-21666.131796/unigene-21666.201092	2	0	2
Molecular function	GO:0005254	chloride channel activity	2/113	151/180523	0.00413841	0.0983215	0.0629603	unigene-21666.135570/unigene-48118.0	2	0	2
Molecular function	GO:0015108	chloride transmembrane transporter activity	2/113	165/180523	0.00491607	0.0983215	0.0629603	unigene-21666.135570/unigene-48118.0	2	0	2
Molecular function	GO:0015101	organic cation transmembrane transporter activity	2/113	181/180523	0.00588052	0.100809	0.0645531	unigene-21666.131796/unigene-21666.201092	2	0	2
Molecular function	GO:1990135	flavonoid sulfotransferase activity	1/113	11/180523	0.00686423	0.102963	0.0659327	unigene-21666.91895	1	0	1
Molecular function	GO:0005052	peroxisome matrix targeting signal-1 binding	1/113	13/180523	0.00810724	0.107415	0.0687833	unigene-21666.163734	1	0	1
Molecular function	GO:0036033	mediator complex binding	1/113	15/180523	0.00934872	0.107415	0.0687833	unigene-21666.122773	1	0	1
Molecular function	GO:0000268	peroxisome targeting sequence binding	1/113	20/180523	0.0124457	0.107415	0.0687833	unigene-21666.163734	1	0	1
Molecular function	GO:0090422	thiamine pyrophosphate transmembrane transporter activity	1/113	22/180523	0.0136818	0.107415	0.0687833	unigene-21666.131796	1	0	1
Molecular function	GO:0005253	anion channel activity	2/113	284/180523	0.0139133	0.107415	0.0687833	unigene-21666.135570/unigene-48118.0	2	0	2
Molecular function	GO:0004709	MAP kinase kinase kinase activity	2/113	308/180523	0.0162107	0.107415	0.0687833	unigene-21666.125725/unigene-21666.69211	2	0	2
Molecular function	GO:0004819	glutamine-tRNA ligase activity	1/113	28/180523	0.0173808	0.107415	0.0687833	unigene-21666.194201	1	0	1
Molecular function	GO:0004348	glucosylceramidase activity	1/113	31/180523	0.0192252	0.107415	0.0687833	unigene-21666.169831	1	0	1
Molecular function	GO:0003689	DNA clamp loader activity	1/113	32/180523	0.0198392	0.107415	0.0687833	unigene-112344.1	1	0	1
Molecular function	GO:0033170	protein-DNA loading ATPase activity	1/113	32/180523	0.0198392	0.107415	0.0687833	unigene-112344.1	1	0	1
Molecular function	GO:0070122	isopeptidase activity	1/113	32/180523	0.0198392	0.107415	0.0687833	unigene-21666.107591	1	0	1
Molecular function	GO:0070138	ubiquitin-like protein-specific isopeptidase activity	1/113	32/180523	0.0198392	0.107415	0.0687833	unigene-21666.107591	1	0	1
Molecular function	GO:0070140	SUMO-specific isopeptidase activity	1/113	32/180523	0.0198392	0.107415	0.0687833	unigene-21666.107591	1	0	1
Molecular function	GO:0080023	3R-hydroxyacyl-CoA dehydratase activity	1/113	37/180523	0.0229037	0.107415	0.0687833	unigene-21666.229663	1	0	1
Molecular function	GO:0004607	phosphatidylcholine-sterol O-acyltransferase activity	1/113	38/180523	0.0235154	0.107415	0.0687833	unigene-21666.196246	1	0	1
Molecular function	GO:0080095	phosphatidylethanolamine-sterol O-acyltransferase activity	1/113	38/180523	0.0235154	0.107415	0.0687833	unigene-21666.196246	1	0	1
Molecular function	GO:0080096	phosphatidate-sterol O-acyltransferase activity	1/113	38/180523	0.0235154	0.107415	0.0687833	unigene-21666.196246	1	0	1
Molecular function	GO:0050152	omega-amidase activity	1/113	39/180523	0.0241268	0.107415	0.0687833	unigene-21666.116988	1	0	1
Molecular function	GO:0004821	histidine-tRNA ligase activity	1/113	40/180523	0.0247378	0.107415	0.0687833	unigene-21666.100556	1	0	1
Molecular function	GO:0070182	DNA polymerase binding	1/113	41/180523	0.0253484	0.107415	0.0687833	unigene-115886.1	1	0	1
Molecular function	GO:1901474	azole transmembrane transporter activity	1/113	42/180523	0.0259586	0.107415	0.0687833	unigene-21666.131796	1	0	1
Molecular function	GO:0008146	sulfotransferase activity	1/113	45/180523	0.027787	0.107563	0.0688779	unigene-21666.91895	1	0	1
Molecular function	GO:0009940	amino-terminal vacuolar sorting propeptide binding	1/113	45/180523	0.027787	0.107563	0.0688779	unigene-21666.32461	1	0	1
Molecular function	GO:0004072	aspartate kinase activity	1/113	49/180523	0.0302197	0.113324	0.0725669	unigene-21666.23092	1	0	1
Molecular function	GO:0010997	anaphase-promoting complex binding	1/113	52/180523	0.0320401	0.11469	0.0734418	unigene-21666.6440	1	0	1
Molecular function	GO:0070273	phosphatidylinositol-4-phosphate binding	1/113	54/180523	0.0332519	0.11469	0.0734418	unigene-21666.33820	1	0	1
Molecular function	GO:0005048	signal sequence binding	2/113	468/180523	0.0351328	0.11469	0.0734418	unigene-21666.163734/unigene-21666.32461	2	0	2
Molecular function	GO:0010209	vacuolar sorting signal binding	1/113	63/180523	0.0386863	0.11469	0.0734418	unigene-21666.32461	1	0	1
Molecular function	GO:0051996	squalene synthase activity	1/113	66/180523	0.0404911	0.11469	0.0734418	unigene-21666.93366	1	0	1
Molecular function	GO:0004310	farnesyl-diphosphate farnesyltransferase activity	1/113	67/180523	0.0410919	0.11469	0.0734418	unigene-21666.93366	1	0	1
Molecular function	GO:0005546	phosphatidylinositol-4,5-bisphosphate binding	1/113	72/180523	0.0440905	0.11469	0.0734418	unigene-21666.33820	1	0	1
Molecular function	GO:0102077	oleamide hydrolase activity	1/113	72/180523	0.0440905	0.11469	0.0734418	unigene-21666.148288	1	0	1
Molecular function	GO:0103073	anandamide amidohydrolase activity	1/113	72/180523	0.0440905	0.11469	0.0734418	unigene-21666.148288	1	0	1
Molecular function	GO:0015651	quaternary ammonium group transmembrane transporter activity	1/113	77/180523	0.0470798	0.11469	0.0734418	unigene-21666.201092	1	0	1
Molecular function	GO:0090416	nicotinate transmembrane transporter activity	1/113	77/180523	0.0470798	0.11469	0.0734418	unigene-21666.201092	1	0	1
Molecular function	GO:0090417	N-methylnicotinate transmembrane transporter activity	1/113	77/180523	0.0470798	0.11469	0.0734418	unigene-21666.201092	1	0	1
Molecular function	GO:0047412	N-(long-chain-acyl)ethanolamine deacylase activity	1/113	78/180523	0.0476765	0.11469	0.0734418	unigene-21666.148288	1	0	1
Molecular function	GO:0061665	SUMO ligase activity	1/113	78/180523	0.0476765	0.11469	0.0734418	unigene-21666.172802	1	0	1
Molecular function	GO:0004311	farnesyltranstransferase activity	1/113	80/180523	0.0488689	0.11469	0.0734418	unigene-21666.93366	1	0	1
Molecular function	GO:0015146	pentose transmembrane transporter activity	1/113	82/180523	0.0500598	0.11469	0.0734418	unigene-21666.226134	1	0	1
Molecular function	GO:0015148	D-xylose transmembrane transporter activity	1/113	82/180523	0.0500598	0.11469	0.0734418	unigene-21666.226134	1	0	1
Molecular function	GO:0015575	mannitol transmembrane transporter activity	1/113	82/180523	0.0500598	0.11469	0.0734418	unigene-21666.226134	1	0	1
Molecular function	GO:0015576	sorbitol transmembrane transporter activity	1/113	82/180523	0.0500598	0.11469	0.0734418	unigene-21666.226134	1	0	1
Molecular function	GO:0015591	D-ribose transmembrane transporter activity	1/113	82/180523	0.0500598	0.11469	0.0734418	unigene-21666.226134	1	0	1
Molecular function	GO:0015168	glycerol transmembrane transporter activity	1/113	83/180523	0.0506547	0.11469	0.0734418	unigene-21666.226134	1	0	1
Molecular function	GO:0004144	diacylglycerol O-acyltransferase activity	1/113	92/180523	0.0559921	0.119513	0.0765303	unigene-2150.0	1	0	1
Molecular function	GO:0004630	phospholipase D activity	1/113	94/180523	0.0571742	0.119513	0.0765303	unigene-21666.157395	1	0	1
Molecular function	GO:0016929	SUMO-specific protease activity	1/113	94/180523	0.0571742	0.119513	0.0765303	unigene-21666.107591	1	0	1
Molecular function	GO:0070290	N-acylphosphatidylethanolamine-specific phospholipase D activity	1/113	94/180523	0.0571742	0.119513	0.0765303	unigene-21666.157395	1	0	1
Molecular function	GO:0005354	galactose transmembrane transporter activity	1/113	95/180523	0.0577647	0.119513	0.0765303	unigene-21666.226134	1	0	1
Molecular function	GO:0019202	amino acid kinase activity	1/113	97/180523	0.0589445	0.119887	0.0767699	unigene-21666.23092	1	0	1
Molecular function	GO:0003950	NAD+ ADP-ribosyltransferase activity	1/113	106/180523	0.0642358	0.128472	0.0822669	unigene-21666.123452	1	0	1
Molecular function	GO:0015180	L-alanine transmembrane transporter activity	1/113	114/180523	0.0689144	0.131265	0.084056	unigene-21666.136688	1	0	1
Molecular function	GO:0022858	alanine transmembrane transporter activity	1/113	114/180523	0.0689144	0.131265	0.084056	unigene-21666.136688	1	0	1
Molecular function	GO:0070006	metalloaminopeptidase activity	1/113	114/180523	0.0689144	0.131265	0.084056	unigene-21666.124946	1	0	1
Molecular function	GO:0004430	1-phosphatidylinositol 4-kinase activity	1/113	120/180523	0.0724081	0.132498	0.0848454	unigene-21666.33820	1	0	1
Molecular function	GO:0015185	gamma-aminobutyric acid transmembrane transporter activity	1/113	124/180523	0.07473	0.132498	0.0848454	unigene-21666.136688	1	0	1
Molecular function	GO:0005365	myo-inositol transmembrane transporter activity	1/113	130/180523	0.0782021	0.132498	0.0848454	unigene-21666.226134	1	0	1
Molecular function	GO:0015181	arginine transmembrane transporter activity	1/113	130/180523	0.0782021	0.132498	0.0848454	unigene-21666.136688	1	0	1
Molecular function	GO:0015189	L-lysine transmembrane transporter activity	1/113	130/180523	0.0782021	0.132498	0.0848454	unigene-21666.136688	1	0	1
Molecular function	GO:0005313	L-glutamate transmembrane transporter activity	1/113	132/180523	0.0793566	0.132498	0.0848454	unigene-21666.136688	1	0	1
Molecular function	GO:1902936	phosphatidylinositol bisphosphate binding	1/113	133/180523	0.0799333	0.132498	0.0848454	unigene-21666.33820	1	0	1
Molecular function	GO:0005247	voltage-gated chloride channel activity	1/113	136/180523	0.0816613	0.132498	0.0848454	unigene-48118.0	1	0	1
Molecular function	GO:0019789	SUMO transferase activity	1/113	136/180523	0.0816613	0.132498	0.0848454	unigene-21666.172802	1	0	1
Molecular function	GO:0052742	phosphatidylinositol kinase activity	1/113	136/180523	0.0816613	0.132498	0.0848454	unigene-21666.33820	1	0	1
Molecular function	GO:0015166	polyol transmembrane transporter activity	1/113	138/180523	0.0828114	0.132498	0.0848454	unigene-21666.226134	1	0	1
Molecular function	GO:0015174	basic amino acid transmembrane transporter activity	1/113	138/180523	0.0828114	0.132498	0.0848454	unigene-21666.136688	1	0	1
Molecular function	GO:0070300	phosphatidic acid binding	1/113	144/180523	0.0862535	0.135313	0.0866478	unigene-21666.33820	1	0	1
Molecular function	GO:0015172	acidic amino acid transmembrane transporter activity	1/113	145/180523	0.0868259	0.135313	0.0866478	unigene-21666.136688	1	0	1
Molecular function	GO:0015175	neutral amino acid transmembrane transporter activity	1/113	154/180523	0.0919617	0.141416	0.0905561	unigene-21666.136688	1	0	1
Molecular function	GO:0008519	ammonium transmembrane transporter activity	1/113	156/180523	0.0930992	0.141416	0.0905561	unigene-21666.201092	1	0	1
Molecular function	GO:0008143	poly(A) binding	1/113	162/180523	0.0965029	0.144644	0.0926229	unigene-21666.93536	1	0	1
Molecular function	GO:0070717	poly-purine tract binding	1/113	164/180523	0.0976347	0.144644	0.0926229	unigene-21666.93536	1	0	1
Molecular function	GO:1901618	organic hydroxy compound transmembrane transporter activity	1/113	171/180523	0.101585	0.148661	0.095195	unigene-21666.226134	1	0	1
Molecular function	GO:0005326	neurotransmitter transporter activity	1/113	179/180523	0.106078	0.153366	0.0982082	unigene-21666.136688	1	0	1
Molecular function	GO:0045735	nutrient reservoir activity	1/113	188/180523	0.111107	0.156816	0.100417	unigene-21666.75914	1	0	1
Molecular function	GO:0004130	cytochrome-c peroxidase activity	1/113	191/180523	0.112777	0.156816	0.100417	unigene-21666.21363	1	0	1
Molecular function	GO:1901682	sulfur compound transmembrane transporter activity	1/113	193/180523	0.113888	0.156816	0.100417	unigene-21666.131796	1	0	1
Molecular function	GO:0016688	L-ascorbate peroxidase activity	1/113	195/180523	0.114998	0.156816	0.100417	unigene-21666.21363	1	0	1
Molecular function	GO:0016774	phosphotransferase activity, carboxyl group as acceptor	1/113	195/180523	0.114998	0.156816	0.100417	unigene-21666.23092	1	0	1
Molecular function	GO:0004012	phospholipid-translocating ATPase activity	1/113	200/180523	0.117768	0.15793	0.101131	unigene-21666.127471	1	0	1
Molecular function	GO:0003887	DNA-directed DNA polymerase activity	1/113	202/180523	0.118873	0.15793	0.101131	unigene-21666.9034	1	0	1
Molecular function	GO:1901981	phosphatidylinositol phosphate binding	1/113	205/180523	0.120529	0.15793	0.101131	unigene-21666.33820	1	0	1
Molecular function	GO:0005338	nucleotide-sugar transmembrane transporter activity	1/113	206/180523	0.12108	0.15793	0.101131	unigene-21666.52281	1	0	1
Molecular function	GO:0005548	phospholipid transporter activity	1/113	215/180523	0.126025	0.162613	0.104129	unigene-21666.127471	1	0	1
Molecular function	GO:0015179	L-amino acid transmembrane transporter activity	1/113	230/180523	0.134205	0.168435	0.107857	unigene-21666.136688	1	0	1
Molecular function	GO:0003872	6-phosphofructokinase activity	1/113	231/180523	0.134748	0.168435	0.107857	unigene-21666.83259	1	0	1
Molecular function	GO:0004040	amidase activity	1/113	231/180523	0.134748	0.168435	0.107857	unigene-21666.148288	1	0	1
Molecular function	GO:0016411	acylglycerol O-acyltransferase activity	1/113	248/180523	0.143921	0.177205	0.113473	unigene-2150.0	1	0	1
Molecular function	GO:0008235	metalloexopeptidase activity	1/113	253/180523	0.146601	0.177205	0.113473	unigene-21666.124946	1	0	1
Molecular function	GO:0008308	voltage-gated anion channel activity	1/113	253/180523	0.146601	0.177205	0.113473	unigene-48118.0	1	0	1
Molecular function	GO:0004791	thioredoxin-disulfide reductase activity	1/113	255/180523	0.14767	0.177205	0.113473	unigene-21666.106938	1	0	1
Molecular function	GO:0051087	chaperone binding	1/113	265/180523	0.152998	0.18178	0.116403	unigene-38286.0	1	0	1
Molecular function	GO:0008137	NADH dehydrogenase (ubiquinone) activity	1/113	277/180523	0.159348	0.185648	0.11888	unigene-21666.241021	1	0	1
Molecular function	GO:0050136	NADH dehydrogenase (quinone) activity	1/113	277/180523	0.159348	0.185648	0.11888	unigene-21666.241021	1	0	1
Molecular function	GO:0030145	manganese ion binding	1/113	284/180523	0.16303	0.188112	0.120458	unigene-21666.75914	1	0	1
Molecular function	GO:0005310	dicarboxylic acid transmembrane transporter activity	1/113	288/180523	0.165127	0.188713	0.120843	unigene-21666.136688	1	0	1
Molecular function	GO:0008443	phosphofructokinase activity	1/113	291/180523	0.166697	0.188713	0.120843	unigene-21666.83259	1	0	1
Molecular function	GO:0004659	prenyltransferase activity	1/113	310/180523	0.176568	0.19802	0.126802	unigene-21666.93366	1	0	1
Molecular function	GO:0003954	NADH dehydrogenase activity	1/113	343/180523	0.193438	0.214931	0.137632	unigene-21666.241021	1	0	1
Molecular function	GO:0016782	transferase activity, transferring sulfur-containing groups	1/113	351/180523	0.197476	0.217405	0.139216	unigene-21666.91895	1	0	1
Molecular function	GO:0015605	organophosphate ester transmembrane transporter activity	1/113	376/180523	0.209966	0.229054	0.146675	unigene-21666.131796	1	0	1
Molecular function	GO:0016668	oxidoreductase activity, acting on a sulfur group of donors, NAD(P) as acceptor	1/113	384/180523	0.213922	0.231267	0.148092	unigene-21666.106938	1	0	1
Molecular function	GO:0008081	phosphoric diester hydrolase activity	1/113	396/180523	0.219819	0.23552	0.150816	unigene-21666.157395	1	0	1
Molecular function	GO:0004693	cyclin-dependent protein serine/threonine kinase activity	1/113	414/180523	0.228582	0.240613	0.154077	unigene-115886.1	1	0	1
Molecular function	GO:0097472	cyclin-dependent protein kinase activity	1/113	414/180523	0.228582	0.240613	0.154077	unigene-115886.1	1	0	1
Molecular function	GO:0004177	aminopeptidase activity	1/113	446/180523	0.243921	0.254527	0.162986	unigene-21666.124946	1	0	1
Molecular function	GO:0003678	DNA helicase activity	1/113	462/180523	0.251477	0.255695	0.163734	unigene-21666.82752	1	0	1
Molecular function	GO:0000149	SNARE binding	1/113	466/180523	0.253355	0.255695	0.163734	unigene-21666.74247	1	0	1
Molecular function	GO:0019901	protein kinase binding	1/113	467/180523	0.253823	0.255695	0.163734	unigene-115886.1	1	0	1
Molecular function	GO:0051015	actin filament binding	1/113	470/180523	0.255227	0.255695	0.163734	unigene-21666.33820	1	0	1
Molecular function	GO:0016655	oxidoreductase activity, acting on NAD(P)H, quinone or similar compound as acceptor	1/113	471/180523	0.255695	0.255695	0.163734	unigene-21666.241021	1	0	1
Biological process	GO:1902001	fatty acid transmembrane transport	2/111	23/156071	0.000125588	0.0383045	0.0317276	unigene-21666.1273/unigene-51559.0	2	0	2
Biological process	GO:0015718	monocarboxylic acid transport	4/111	460/156071	0.00034772	0.0530274	0.0439226	unigene-21666.1273/unigene-21666.201092/unigene-51559.0/unigene-21666.136688	4	0	4
Biological process	GO:0010193	response to ozone	3/111	300/156071	0.00133776	0.122325	0.101322	unigene-21666.123452/unigene-21666.93536/unigene-21666.206967	3	0	3
Biological process	GO:0015908	fatty acid transport	2/111	96/156071	0.00218813	0.122325	0.101322	unigene-21666.1273/unigene-51559.0	2	0	2
Biological process	GO:0070726	cell wall assembly	2/111	105/156071	0.0026091	0.122325	0.101322	unigene-21666.1273/unigene-51559.0	2	0	2
Biological process	GO:0071668	plant-type cell wall assembly	2/111	105/156071	0.0026091	0.122325	0.101322	unigene-21666.1273/unigene-51559.0	2	0	2
Biological process	GO:0048017	inositol lipid-mediated signaling	2/111	109/156071	0.00280746	0.122325	0.101322	unigene-21666.157395/unigene-21666.33820	2	0	2
Biological process	GO:0032147	activation of protein kinase activity	3/111	420/156071	0.00346135	0.131964	0.109306	unigene-21666.125725/unigene-21666.19486/unigene-21666.69211	3	0	3
Biological process	GO:0031098	stress-activated protein kinase signaling cascade	3/111	447/156071	0.00411719	0.139527	0.11557	unigene-21666.125725/unigene-21666.19486/unigene-21666.69211	3	0	3
Biological process	GO:0015695	organic cation transport	2/111	155/156071	0.00557285	0.169972	0.140788	unigene-21666.131796/unigene-21666.201092	2	0	2
Biological process	GO:0051560	mitochondrial calcium ion homeostasis	1/111	16/156071	0.0113195	0.185315	0.153497	unigene-21666.136397	1	0	1
Biological process	GO:0051562	negative regulation of mitochondrial calcium ion concentration	1/111	16/156071	0.0113195	0.185315	0.153497	unigene-21666.136397	1	0	1
Biological process	GO:0055088	lipid homeostasis	2/111	252/156071	0.0141219	0.185315	0.153497	unigene-21666.1273/unigene-51559.0	2	0	2
Biological process	GO:0030974	thiamine pyrophosphate transmembrane transport	1/111	22/156071	0.0155315	0.185315	0.153497	unigene-21666.131796	1	0	1
Biological process	GO:0045117	azole transport	1/111	22/156071	0.0155315	0.185315	0.153497	unigene-21666.131796	1	0	1
Biological process	GO:0010208	pollen wall assembly	2/111	273/156071	0.0164196	0.185315	0.153497	unigene-21666.1273/unigene-51559.0	2	0	2
Biological process	GO:0045995	regulation of embryonic development	2/111	273/156071	0.0164196	0.185315	0.153497	unigene-21666.135213/unigene-21666.19486	2	0	2
Biological process	GO:0051510	regulation of unidimensional cell growth	2/111	279/156071	0.0171035	0.185315	0.153497	unigene-21666.135213/unigene-21666.19486	2	0	2
Biological process	GO:0006425	glutaminyl-tRNA aminoacylation	1/111	28/156071	0.0197257	0.185315	0.153497	unigene-21666.194201	1	0	1
Biological process	GO:0036103	Kdo2-lipid A metabolic process	1/111	28/156071	0.0197257	0.185315	0.153497	unigene-21666.55275	1	0	1
Biological process	GO:0036104	Kdo2-lipid A biosynthetic process	1/111	28/156071	0.0197257	0.185315	0.153497	unigene-21666.55275	1	0	1
Biological process	GO:0061635	regulation of protein complex stability	1/111	28/156071	0.0197257	0.185315	0.153497	unigene-21666.153137	1	0	1
Biological process	GO:0006680	glucosylceramide catabolic process	1/111	31/156071	0.0218161	0.185315	0.153497	unigene-21666.169831	1	0	1
Biological process	GO:0019377	glycolipid catabolic process	1/111	31/156071	0.0218161	0.185315	0.153497	unigene-21666.169831	1	0	1
Biological process	GO:0046477	glycosylceramide catabolic process	1/111	31/156071	0.0218161	0.185315	0.153497	unigene-21666.169831	1	0	1
Biological process	GO:0046479	glycosphingolipid catabolic process	1/111	31/156071	0.0218161	0.185315	0.153497	unigene-21666.169831	1	0	1
Biological process	GO:0046514	ceramide catabolic process	1/111	31/156071	0.0218161	0.185315	0.153497	unigene-21666.169831	1	0	1
Biological process	GO:0071629	cytoplasm protein quality control by the ubiquitin-proteasome system	1/111	31/156071	0.0218161	0.185315	0.153497	unigene-21666.153137	1	0	1
Biological process	GO:0010927	cellular component assembly involved in morphogenesis	2/111	319/156071	0.0219632	0.185315	0.153497	unigene-21666.1273/unigene-51559.0	2	0	2
Biological process	GO:0043622	cortical microtubule organization	2/111	328/156071	0.0231265	0.185315	0.153497	unigene-21666.125725/unigene-21666.69211	2	0	2
Biological process	GO:0061387	regulation of extent of cell growth	1/111	33/156071	0.0232073	0.185315	0.153497	unigene-21666.19486	1	0	1
Biological process	GO:0033542	fatty acid beta-oxidation, unsaturated, even number	1/111	37/156071	0.0259838	0.185315	0.153497	unigene-21666.229663	1	0	1
Biological process	GO:0006706	steroid catabolic process	1/111	39/156071	0.0273691	0.185315	0.153497	unigene-21666.196246	1	0	1
Biological process	GO:0016127	sterol catabolic process	1/111	39/156071	0.0273691	0.185315	0.153497	unigene-21666.196246	1	0	1
Biological process	GO:0034433	steroid esterification	1/111	39/156071	0.0273691	0.185315	0.153497	unigene-21666.196246	1	0	1
Biological process	GO:0034434	sterol esterification	1/111	39/156071	0.0273691	0.185315	0.153497	unigene-21666.196246	1	0	1
Biological process	GO:0006427	histidyl-tRNA aminoacylation	1/111	40/156071	0.028061	0.185315	0.153497	unigene-21666.100556	1	0	1
Biological process	GO:0030865	cortical cytoskeleton organization	2/111	368/156071	0.0285933	0.185315	0.153497	unigene-21666.125725/unigene-21666.69211	2	0	2
Biological process	GO:0031122	cytoplasmic microtubule organization	2/111	368/156071	0.0285933	0.185315	0.153497	unigene-21666.125725/unigene-21666.69211	2	0	2
Biological process	GO:0000076	DNA replication checkpoint	1/111	41/156071	0.0287525	0.185315	0.153497	unigene-115886.1	1	0	1
Biological process	GO:0008361	regulation of cell size	2/111	370/156071	0.028879	0.185315	0.153497	unigene-21666.143559/unigene-21666.19486	2	0	2
Biological process	GO:0010239	chloroplast mRNA processing	1/111	42/156071	0.0294434	0.185315	0.153497	unigene-21666.135267	1	0	1
Biological process	GO:0006654	phosphatidic acid biosynthetic process	1/111	43/156071	0.0301339	0.185315	0.153497	unigene-21666.157395	1	0	1
Biological process	GO:0006107	oxaloacetate metabolic process	1/111	44/156071	0.0308238	0.185315	0.153497	unigene-21666.116988	1	0	1
Biological process	GO:0006620	posttranslational protein targeting to endoplasmic reticulum membrane	1/111	44/156071	0.0308238	0.185315	0.153497	unigene-21666.45985	1	0	1
Biological process	GO:0031204	posttranslational protein targeting to membrane, translocation	1/111	44/156071	0.0308238	0.185315	0.153497	unigene-21666.45985	1	0	1
Biological process	GO:0006677	glycosylceramide metabolic process	1/111	45/156071	0.0315133	0.185315	0.153497	unigene-21666.169831	1	0	1
Biological process	GO:0006678	glucosylceramide metabolic process	1/111	45/156071	0.0315133	0.185315	0.153497	unigene-21666.169831	1	0	1
Biological process	GO:0006687	glycosphingolipid metabolic process	1/111	45/156071	0.0315133	0.185315	0.153497	unigene-21666.169831	1	0	1
Biological process	GO:0010190	cytochrome b6f complex assembly	1/111	46/156071	0.0322023	0.185315	0.153497	unigene-21666.185098	1	0	1
Biological process	GO:0042793	plastid transcription	1/111	46/156071	0.0322023	0.185315	0.153497	unigene-21666.221191	1	0	1
Biological process	GO:0045022	early endosome to late endosome transport	1/111	46/156071	0.0322023	0.185315	0.153497	unigene-55887.2	1	0	1
Biological process	GO:0098927	vesicle-mediated transport between endosomal compartments	1/111	46/156071	0.0322023	0.185315	0.153497	unigene-55887.2	1	0	1
Biological process	GO:0072531	pyrimidine-containing compound transmembrane transport	1/111	47/156071	0.0328909	0.185772	0.153875	unigene-21666.131796	1	0	1
Biological process	GO:0030149	sphingolipid catabolic process	1/111	51/156071	0.0356401	0.194111	0.160782	unigene-21666.169831	1	0	1
Biological process	GO:0046466	membrane lipid catabolic process	1/111	51/156071	0.0356401	0.194111	0.160782	unigene-21666.169831	1	0	1
Biological process	GO:0009744	response to sucrose	2/111	438/156071	0.0392517	0.205745	0.170418	unigene-21666.218036/unigene-21666.37180	2	0	2
Biological process	GO:0034285	response to disaccharide	2/111	446/156071	0.0405526	0.205745	0.170418	unigene-21666.218036/unigene-21666.37180	2	0	2
Biological process	GO:0046473	phosphatidic acid metabolic process	1/111	63/156071	0.0438413	0.205745	0.170418	unigene-21666.157395	1	0	1
Biological process	GO:0010102	lateral root morphogenesis	2/111	471/156071	0.0447212	0.205745	0.170418	unigene-21666.123452/unigene-21666.226134	2	0	2
Biological process	GO:0010101	post-embryonic root morphogenesis	2/111	481/156071	0.0464313	0.205745	0.170418	unigene-21666.123452/unigene-21666.226134	2	0	2
Biological process	GO:1902022	L-lysine transport	1/111	68/156071	0.0472381	0.205745	0.170418	unigene-21666.136688	1	0	1
Biological process	GO:1903401	L-lysine transmembrane transport	1/111	68/156071	0.0472381	0.205745	0.170418	unigene-21666.136688	1	0	1
Biological process	GO:0048015	phosphatidylinositol-mediated signaling	1/111	69/156071	0.047916	0.205745	0.170418	unigene-21666.33820	1	0	1
Biological process	GO:0046621	negative regulation of organ growth	1/111	71/156071	0.0492704	0.205745	0.170418	unigene-21666.6440	1	0	1
Biological process	GO:0009395	phospholipid catabolic process	1/111	74/156071	0.0512984	0.205745	0.170418	unigene-21666.157395	1	0	1
Biological process	GO:0009088	threonine biosynthetic process	1/111	75/156071	0.0519734	0.205745	0.170418	unigene-21666.23092	1	0	1
Biological process	GO:0006696	ergosterol biosynthetic process	1/111	76/156071	0.052648	0.205745	0.170418	unigene-21666.93366	1	0	1
Biological process	GO:0008204	ergosterol metabolic process	1/111	76/156071	0.052648	0.205745	0.170418	unigene-21666.93366	1	0	1
Biological process	GO:0044107	cellular alcohol metabolic process	1/111	76/156071	0.052648	0.205745	0.170418	unigene-21666.93366	1	0	1
Biological process	GO:0044108	cellular alcohol biosynthetic process	1/111	76/156071	0.052648	0.205745	0.170418	unigene-21666.93366	1	0	1
Biological process	GO:0097384	cellular lipid biosynthetic process	1/111	76/156071	0.052648	0.205745	0.170418	unigene-21666.93366	1	0	1
Biological process	GO:0051180	vitamin transport	1/111	77/156071	0.0533221	0.205745	0.170418	unigene-21666.201092	1	0	1
Biological process	GO:2001142	nicotinate transport	1/111	77/156071	0.0533221	0.205745	0.170418	unigene-21666.201092	1	0	1
Biological process	GO:2001143	N-methylnicotinate transport	1/111	77/156071	0.0533221	0.205745	0.170418	unigene-21666.201092	1	0	1
Biological process	GO:0042439	ethanolamine-containing compound metabolic process	1/111	78/156071	0.0539957	0.205745	0.170418	unigene-21666.148288	1	0	1
Biological process	GO:0070291	N-acylethanolamine metabolic process	1/111	78/156071	0.0539957	0.205745	0.170418	unigene-21666.148288	1	0	1
Biological process	GO:0019375	galactolipid biosynthetic process	1/111	82/156071	0.0566855	0.205745	0.170418	unigene-21666.157395	1	0	1
Biological process	GO:0033158	regulation of protein import into nucleus, translocation	1/111	84/156071	0.0580275	0.205745	0.170418	unigene-21666.230249	1	0	1
Biological process	GO:0033160	positive regulation of protein import into nucleus, translocation	1/111	84/156071	0.0580275	0.205745	0.170418	unigene-21666.230249	1	0	1
Biological process	GO:0042306	regulation of protein import into nucleus	1/111	84/156071	0.0580275	0.205745	0.170418	unigene-21666.230249	1	0	1
Biological process	GO:0042307	positive regulation of protein import into nucleus	1/111	84/156071	0.0580275	0.205745	0.170418	unigene-21666.230249	1	0	1
Biological process	GO:1900180	regulation of protein localization to nucleus	1/111	84/156071	0.0580275	0.205745	0.170418	unigene-21666.230249	1	0	1
Biological process	GO:1900182	positive regulation of protein localization to nucleus	1/111	84/156071	0.0580275	0.205745	0.170418	unigene-21666.230249	1	0	1
Biological process	GO:0006566	threonine metabolic process	1/111	85/156071	0.0586978	0.205745	0.170418	unigene-21666.23092	1	0	1
Biological process	GO:0019374	galactolipid metabolic process	1/111	86/156071	0.0593676	0.205745	0.170418	unigene-21666.157395	1	0	1
Biological process	GO:0006809	nitric oxide biosynthetic process	1/111	87/156071	0.060037	0.205745	0.170418	unigene-21666.123452	1	0	1
Biological process	GO:0046209	nitric oxide metabolic process	1/111	87/156071	0.060037	0.205745	0.170418	unigene-21666.123452	1	0	1
Biological process	GO:0046824	positive regulation of nucleocytoplasmic transport	1/111	87/156071	0.060037	0.205745	0.170418	unigene-21666.230249	1	0	1
Biological process	GO:0015697	quaternary ammonium group transport	1/111	90/156071	0.0620422	0.207944	0.17224	unigene-21666.201092	1	0	1
Biological process	GO:1902475	L-alpha-amino acid transmembrane transport	1/111	90/156071	0.0620422	0.207944	0.17224	unigene-21666.136688	1	0	1
Biological process	GO:0006821	chloride transport	1/111	92/156071	0.0633767	0.209039	0.173147	unigene-21666.143559	1	0	1
Biological process	GO:0006874	cellular calcium ion homeostasis	1/111	95/156071	0.0653749	0.209039	0.173147	unigene-21666.136397	1	0	1
Biological process	GO:0048640	negative regulation of developmental growth	1/111	96/156071	0.06604	0.209039	0.173147	unigene-21666.6440	1	0	1
Biological process	GO:0009835	fruit ripening	1/111	100/156071	0.0686958	0.209039	0.173147	unigene-21666.128797	1	0	1
Biological process	GO:0019441	tryptophan catabolic process to kynurenine	1/111	100/156071	0.0686958	0.209039	0.173147	unigene-21666.106527	1	0	1
Biological process	GO:0070189	kynurenine metabolic process	1/111	100/156071	0.0686958	0.209039	0.173147	unigene-21666.106527	1	0	1
Biological process	GO:0071218	cellular response to misfolded protein	1/111	104/156071	0.0713442	0.209039	0.173147	unigene-21666.153137	1	0	1
Biological process	GO:0000712	resolution of meiotic recombination intermediates	1/111	107/156071	0.0733255	0.209039	0.173147	unigene-112344.1	1	0	1
Biological process	GO:0051512	positive regulation of unidimensional cell growth	1/111	107/156071	0.0733255	0.209039	0.173147	unigene-21666.135213	1	0	1
Biological process	GO:1900490	positive regulation of hydroxymethylglutaryl-CoA reductase (NADPH) activity	1/111	109/156071	0.0746441	0.209039	0.173147	unigene-21666.194916	1	0	1
Biological process	GO:2001215	regulation of hydroxymethylglutaryl-CoA reductase (NADPH) activity	1/111	109/156071	0.0746441	0.209039	0.173147	unigene-21666.194916	1	0	1
Biological process	GO:0051307	meiotic chromosome separation	1/111	110/156071	0.0753027	0.209039	0.173147	unigene-112344.1	1	0	1
Biological process	GO:1904591	positive regulation of protein import	1/111	111/156071	0.0759608	0.209039	0.173147	unigene-21666.230249	1	0	1
Biological process	GO:0019432	triglyceride biosynthetic process	1/111	112/156071	0.0766185	0.209039	0.173147	unigene-2150.0	1	0	1
Biological process	GO:0015807	L-amino acid transport	1/111	113/156071	0.0772756	0.209039	0.173147	unigene-21666.136688	1	0	1
Biological process	GO:0016926	protein desumoylation	1/111	113/156071	0.0772756	0.209039	0.173147	unigene-21666.107591	1	0	1
Biological process	GO:0046620	regulation of organ growth	1/111	116/156071	0.0792445	0.209039	0.173147	unigene-21666.6440	1	0	1
Biological process	GO:0006569	tryptophan catabolic process	1/111	117/156071	0.0798998	0.209039	0.173147	unigene-21666.106527	1	0	1
Biological process	GO:0042436	indole-containing compound catabolic process	1/111	117/156071	0.0798998	0.209039	0.173147	unigene-21666.106527	1	0	1
Biological process	GO:0046218	indolalkylamine catabolic process	1/111	117/156071	0.0798998	0.209039	0.173147	unigene-21666.106527	1	0	1
Biological process	GO:0090480	purine nucleotide-sugar transmembrane transport	1/111	118/156071	0.0805547	0.209039	0.173147	unigene-21666.52281	1	0	1
Biological process	GO:0009625	response to insect	1/111	119/156071	0.0812091	0.209039	0.173147	unigene-21666.230249	1	0	1
Biological process	GO:0055074	calcium ion homeostasis	1/111	119/156071	0.0812091	0.209039	0.173147	unigene-21666.136397	1	0	1
Biological process	GO:0009904	chloroplast accumulation movement	1/111	121/156071	0.0825165	0.209039	0.173147	unigene-21666.10583	1	0	1
Biological process	GO:0016560	protein import into peroxisome matrix, docking	1/111	121/156071	0.0825165	0.209039	0.173147	unigene-21666.163734	1	0	1
Biological process	GO:0000303	response to superoxide	1/111	122/156071	0.0831696	0.209039	0.173147	unigene-21666.123452	1	0	1
Biological process	GO:0051601	exocyst localization	1/111	123/156071	0.0838221	0.209039	0.173147	unigene-21666.74247	1	0	1
Biological process	GO:1904589	regulation of protein import	1/111	123/156071	0.0838221	0.209039	0.173147	unigene-21666.230249	1	0	1
Biological process	GO:0009903	chloroplast avoidance movement	1/111	124/156071	0.0844743	0.209039	0.173147	unigene-21666.10583	1	0	1
Biological process	GO:0015812	gamma-aminobutyric acid transport	1/111	124/156071	0.0844743	0.209039	0.173147	unigene-21666.136688	1	0	1
Biological process	GO:0009245	lipid A biosynthetic process	1/111	129/156071	0.0877279	0.209039	0.173147	unigene-21666.55275	1	0	1
Biological process	GO:0046460	neutral lipid biosynthetic process	1/111	129/156071	0.0877279	0.209039	0.173147	unigene-2150.0	1	0	1
Biological process	GO:0046463	acylglycerol biosynthetic process	1/111	129/156071	0.0877279	0.209039	0.173147	unigene-2150.0	1	0	1
Biological process	GO:0046493	lipid A metabolic process	1/111	129/156071	0.0877279	0.209039	0.173147	unigene-21666.55275	1	0	1
Biological process	GO:0051788	response to misfolded protein	1/111	129/156071	0.0877279	0.209039	0.173147	unigene-21666.153137	1	0	1
Biological process	GO:1901269	lipooligosaccharide metabolic process	1/111	129/156071	0.0877279	0.209039	0.173147	unigene-21666.55275	1	0	1
Biological process	GO:1901271	lipooligosaccharide biosynthetic process	1/111	129/156071	0.0877279	0.209039	0.173147	unigene-21666.55275	1	0	1
Biological process	GO:0072348	sulfur compound transport	1/111	134/156071	0.0909701	0.212706	0.176184	unigene-21666.131796	1	0	1
Biological process	GO:0010018	far-red light signaling pathway	1/111	137/156071	0.09291	0.212706	0.176184	unigene-21666.2904	1	0	1
Biological process	GO:0071490	cellular response to far red light	1/111	138/156071	0.0935557	0.212706	0.176184	unigene-21666.2904	1	0	1
Biological process	GO:1902653	secondary alcohol biosynthetic process	1/111	138/156071	0.0935557	0.212706	0.176184	unigene-21666.93366	1	0	1
Biological process	GO:0015696	ammonium transport	1/111	139/156071	0.0942009	0.212706	0.176184	unigene-21666.201092	1	0	1
Biological process	GO:1902652	secondary alcohol metabolic process	1/111	139/156071	0.0942009	0.212706	0.176184	unigene-21666.93366	1	0	1
Biological process	GO:0009089	lysine biosynthetic process via diaminopimelate	1/111	140/156071	0.0948457	0.212706	0.176184	unigene-21666.23092	1	0	1
Biological process	GO:0046451	diaminopimelate metabolic process	1/111	140/156071	0.0948457	0.212706	0.176184	unigene-21666.23092	1	0	1
Biological process	GO:0006884	cell volume homeostasis	1/111	143/156071	0.0967774	0.212891	0.176338	unigene-21666.143559	1	0	1
Biological process	GO:0046822	regulation of nucleocytoplasmic transport	1/111	143/156071	0.0967774	0.212891	0.176338	unigene-21666.230249	1	0	1
Biological process	GO:0031425	chloroplast RNA processing	1/111	147/156071	0.0993466	0.212891	0.176338	unigene-21666.135267	1	0	1
Biological process	GO:0048639	positive regulation of developmental growth	1/111	149/156071	0.100628	0.212891	0.176338	unigene-21666.135213	1	0	1
Biological process	GO:0006672	ceramide metabolic process	1/111	150/156071	0.101269	0.212891	0.176338	unigene-21666.169831	1	0	1
Biological process	GO:0032388	positive regulation of intracellular transport	1/111	151/156071	0.101908	0.212891	0.176338	unigene-21666.230249	1	0	1
Biological process	GO:0051222	positive regulation of protein transport	1/111	151/156071	0.101908	0.212891	0.176338	unigene-21666.230249	1	0	1
Biological process	GO:0090316	positive regulation of intracellular protein transport	1/111	151/156071	0.101908	0.212891	0.176338	unigene-21666.230249	1	0	1
Biological process	GO:1903829	positive regulation of cellular protein localization	1/111	151/156071	0.101908	0.212891	0.176338	unigene-21666.230249	1	0	1
Biological process	GO:1904951	positive regulation of establishment of protein localization	1/111	151/156071	0.101908	0.212891	0.176338	unigene-21666.230249	1	0	1
Biological process	GO:0000060	protein import into nucleus, translocation	1/111	153/156071	0.103187	0.214095	0.177335	unigene-21666.230249	1	0	1
Biological process	GO:0000305	response to oxygen radical	1/111	158/156071	0.106375	0.216001	0.178914	unigene-21666.123452	1	0	1
Biological process	GO:0017004	cytochrome complex assembly	1/111	159/156071	0.107011	0.216001	0.178914	unigene-21666.185098	1	0	1
Biological process	GO:0006641	triglyceride metabolic process	1/111	160/156071	0.107646	0.216001	0.178914	unigene-2150.0	1	0	1
Biological process	GO:0009310	amine catabolic process	1/111	160/156071	0.107646	0.216001	0.178914	unigene-21666.106527	1	0	1
Biological process	GO:0042402	cellular biogenic amine catabolic process	1/111	160/156071	0.107646	0.216001	0.178914	unigene-21666.106527	1	0	1
Biological process	GO:0009556	microsporogenesis	1/111	163/156071	0.109551	0.216898	0.179657	unigene-21666.6440	1	0	1
Biological process	GO:0010345	suberin biosynthetic process	1/111	163/156071	0.109551	0.216898	0.179657	unigene-21666.194916	1	0	1
Biological process	GO:0034629	cellular protein-containing complex localization	1/111	168/156071	0.112716	0.216898	0.179657	unigene-21666.74247	1	0	1
Biological process	GO:0045926	negative regulation of growth	1/111	168/156071	0.112716	0.216898	0.179657	unigene-21666.6440	1	0	1
Biological process	GO:0006515	protein quality control for misfolded or incompletely synthesized proteins	1/111	171/156071	0.11461	0.216898	0.179657	unigene-21666.153137	1	0	1
Biological process	GO:0009085	lysine biosynthetic process	1/111	172/156071	0.115241	0.216898	0.179657	unigene-21666.23092	1	0	1
Biological process	GO:0051181	cofactor transport	1/111	174/156071	0.1165	0.216898	0.179657	unigene-21666.131796	1	0	1
Biological process	GO:0035265	organ growth	1/111	175/156071	0.117129	0.216898	0.179657	unigene-21666.6440	1	0	1
Biological process	GO:0006638	neutral lipid metabolic process	1/111	177/156071	0.118386	0.216898	0.179657	unigene-2150.0	1	0	1
Biological process	GO:0006639	acylglycerol metabolic process	1/111	177/156071	0.118386	0.216898	0.179657	unigene-2150.0	1	0	1
Biological process	GO:0080001	mucilage extrusion from seed coat	1/111	177/156071	0.118386	0.216898	0.179657	unigene-21666.135213	1	0	1
Biological process	GO:0051353	positive regulation of oxidoreductase activity	1/111	178/156071	0.119014	0.216898	0.179657	unigene-21666.194916	1	0	1
Biological process	GO:0006836	neurotransmitter transport	1/111	179/156071	0.119641	0.216898	0.179657	unigene-21666.136688	1	0	1
Biological process	GO:0006935	chemotaxis	1/111	181/156071	0.120894	0.216898	0.179657	unigene-21666.122773	1	0	1
Biological process	GO:0010183	pollen tube guidance	1/111	181/156071	0.120894	0.216898	0.179657	unigene-21666.122773	1	0	1
Biological process	GO:0031570	DNA integrity checkpoint	1/111	181/156071	0.120894	0.216898	0.179657	unigene-115886.1	1	0	1
Biological process	GO:0042330	taxis	1/111	181/156071	0.120894	0.216898	0.179657	unigene-21666.122773	1	0	1
Biological process	GO:0050918	positive chemotaxis	1/111	181/156071	0.120894	0.216898	0.179657	unigene-21666.122773	1	0	1
Biological process	GO:0009749	response to glucose	1/111	190/156071	0.126512	0.222729	0.184487	unigene-21666.37180	1	0	1
Biological process	GO:0034293	sexual sporulation	1/111	191/156071	0.127134	0.222729	0.184487	unigene-21666.6440	1	0	1
Biological process	GO:0043934	sporulation	1/111	191/156071	0.127134	0.222729	0.184487	unigene-21666.6440	1	0	1
Biological process	GO:0048236	plant-type sporogenesis	1/111	191/156071	0.127134	0.222729	0.184487	unigene-21666.6440	1	0	1
Biological process	GO:0051865	protein autoubiquitination	1/111	198/156071	0.131476	0.222729	0.184487	unigene-21666.153137	1	0	1
Biological process	GO:0051341	regulation of oxidoreductase activity	1/111	201/156071	0.13333	0.222729	0.184487	unigene-21666.194916	1	0	1
Biological process	GO:0000387	spliceosomal snRNP assembly	1/111	205/156071	0.135796	0.222729	0.184487	unigene-21666.143559	1	0	1
Biological process	GO:0006553	lysine metabolic process	1/111	206/156071	0.136411	0.222729	0.184487	unigene-21666.23092	1	0	1
Biological process	GO:0010272	response to silver ion	1/111	206/156071	0.136411	0.222729	0.184487	unigene-21666.135213	1	0	1
Biological process	GO:0071217	cellular response to external biotic stimulus	1/111	206/156071	0.136411	0.222729	0.184487	unigene-21666.135213	1	0	1
Biological process	GO:0006896	Golgi to vacuole transport	1/111	209/156071	0.138255	0.222729	0.184487	unigene-21666.32461	1	0	1
Biological process	GO:0034308	primary alcohol metabolic process	1/111	210/156071	0.138869	0.222729	0.184487	unigene-21666.148288	1	0	1
Biological process	GO:0016558	protein import into peroxisome matrix	1/111	211/156071	0.139482	0.222729	0.184487	unigene-21666.163734	1	0	1
Biological process	GO:0016129	phytosteroid biosynthetic process	1/111	214/156071	0.141319	0.222729	0.184487	unigene-21666.93366	1	0	1
Biological process	GO:0035967	cellular response to topologically incorrect protein	1/111	219/156071	0.144373	0.222729	0.184487	unigene-21666.153137	1	0	1
Biological process	GO:1902183	regulation of shoot apical meristem development	1/111	219/156071	0.144373	0.222729	0.184487	unigene-21666.135213	1	0	1
Biological process	GO:0015919	peroxisomal membrane transport	1/111	220/156071	0.144982	0.222729	0.184487	unigene-21666.163734	1	0	1
Biological process	GO:0042753	positive regulation of circadian rhythm	1/111	220/156071	0.144982	0.222729	0.184487	unigene-21666.2904	1	0	1
Biological process	GO:0051570	regulation of histone H3-K9 methylation	1/111	220/156071	0.144982	0.222729	0.184487	unigene-112344.1	1	0	1
Biological process	GO:0030307	positive regulation of cell growth	1/111	222/156071	0.1462	0.222729	0.184487	unigene-21666.135213	1	0	1
Biological process	GO:0051050	positive regulation of transport	1/111	223/156071	0.146808	0.222729	0.184487	unigene-21666.230249	1	0	1
Biological process	GO:0006995	cellular response to nitrogen starvation	1/111	227/156071	0.149236	0.222729	0.184487	unigene-21666.157395	1	0	1
Biological process	GO:1902074	response to salt	1/111	227/156071	0.149236	0.222729	0.184487	unigene-21666.135213	1	0	1
Biological process	GO:0010252	auxin homeostasis	1/111	228/156071	0.149842	0.222729	0.184487	unigene-21666.37180	1	0	1
Biological process	GO:0072503	cellular divalent inorganic cation homeostasis	1/111	230/156071	0.151052	0.222729	0.184487	unigene-21666.136397	1	0	1
Biological process	GO:0006071	glycerol metabolic process	1/111	231/156071	0.151657	0.222729	0.184487	unigene-2150.0	1	0	1
Biological process	GO:0010143	cutin biosynthetic process	1/111	232/156071	0.152261	0.222729	0.184487	unigene-21666.194916	1	0	1
Biological process	GO:0048359	mucilage metabolic process involved in seed coat development	1/111	233/156071	0.152865	0.222729	0.184487	unigene-21666.135213	1	0	1
Biological process	GO:0046898	response to cycloheximide	1/111	235/156071	0.154072	0.222729	0.184487	unigene-21666.135213	1	0	1
Biological process	GO:1901654	response to ketone	1/111	237/156071	0.155276	0.222729	0.184487	unigene-21666.135213	1	0	1
Biological process	GO:0033157	regulation of intracellular protein transport	1/111	239/156071	0.156479	0.222729	0.184487	unigene-21666.230249	1	0	1
Biological process	GO:1901616	organic hydroxy compound catabolic process	1/111	239/156071	0.156479	0.222729	0.184487	unigene-21666.196246	1	0	1
Biological process	GO:0006625	protein targeting to peroxisome	1/111	243/156071	0.15888	0.222729	0.184487	unigene-21666.163734	1	0	1
Biological process	GO:0009902	chloroplast relocation	1/111	243/156071	0.15888	0.222729	0.184487	unigene-21666.10583	1	0	1
Biological process	GO:0018107	peptidyl-threonine phosphorylation	1/111	243/156071	0.15888	0.222729	0.184487	unigene-21666.142373	1	0	1
Biological process	GO:0018210	peptidyl-threonine modification	1/111	243/156071	0.15888	0.222729	0.184487	unigene-21666.142373	1	0	1
Biological process	GO:0051667	establishment of plastid localization	1/111	243/156071	0.15888	0.222729	0.184487	unigene-21666.10583	1	0	1
Biological process	GO:0072662	protein localization to peroxisome	1/111	243/156071	0.15888	0.222729	0.184487	unigene-21666.163734	1	0	1
Biological process	GO:0072663	establishment of protein localization to peroxisome	1/111	243/156071	0.15888	0.222729	0.184487	unigene-21666.163734	1	0	1
Biological process	GO:0016128	phytosteroid metabolic process	1/111	244/156071	0.159479	0.222729	0.184487	unigene-21666.93366	1	0	1
Biological process	GO:0060992	response to fungicide	1/111	244/156071	0.159479	0.222729	0.184487	unigene-21666.135213	1	0	1
Biological process	GO:0006002	fructose 6-phosphate metabolic process	1/111	246/156071	0.160676	0.222729	0.184487	unigene-21666.83259	1	0	1
Biological process	GO:0051304	chromosome separation	1/111	247/156071	0.161274	0.222729	0.184487	unigene-112344.1	1	0	1
Biological process	GO:1902182	shoot apical meristem development	1/111	248/156071	0.161871	0.222729	0.184487	unigene-21666.135213	1	0	1
Biological process	GO:0006817	phosphate ion transport	1/111	251/156071	0.163661	0.222729	0.184487	unigene-82092.1	1	0	1
Biological process	GO:0051567	histone H3-K9 methylation	1/111	251/156071	0.163661	0.222729	0.184487	unigene-112344.1	1	0	1
Biological process	GO:0061647	histone H3-K9 modification	1/111	251/156071	0.163661	0.222729	0.184487	unigene-112344.1	1	0	1
Biological process	GO:0043574	peroxisomal transport	1/111	252/156071	0.164257	0.222729	0.184487	unigene-21666.163734	1	0	1
Biological process	GO:0019750	chloroplast localization	1/111	253/156071	0.164852	0.222729	0.184487	unigene-21666.10583	1	0	1
Biological process	GO:0051644	plastid localization	1/111	253/156071	0.164852	0.222729	0.184487	unigene-21666.10583	1	0	1
Biological process	GO:0006816	calcium ion transport	1/111	254/156071	0.165447	0.222729	0.184487	unigene-21666.136397	1	0	1
Biological process	GO:0010191	mucilage metabolic process	1/111	254/156071	0.165447	0.222729	0.184487	unigene-21666.135213	1	0	1
Biological process	GO:0016925	protein sumoylation	1/111	254/156071	0.165447	0.222729	0.184487	unigene-21666.172802	1	0	1
Biological process	GO:1903409	reactive oxygen species biosynthetic process	1/111	254/156071	0.165447	0.222729	0.184487	unigene-21666.123452	1	0	1
Biological process	GO:0009943	adaxial/abaxial axis specification	1/111	256/156071	0.166636	0.222729	0.184487	unigene-21666.135213	1	0	1
Biological process	GO:0009944	polarity specification of adaxial/abaxial axis	1/111	256/156071	0.166636	0.222729	0.184487	unigene-21666.135213	1	0	1
Biological process	GO:0051223	regulation of protein transport	1/111	257/156071	0.16723	0.222729	0.184487	unigene-21666.230249	1	0	1
Biological process	GO:0070201	regulation of establishment of protein localization	1/111	257/156071	0.16723	0.222729	0.184487	unigene-21666.230249	1	0	1
Biological process	GO:0090087	regulation of peptide transport	1/111	257/156071	0.16723	0.222729	0.184487	unigene-21666.230249	1	0	1
Biological process	GO:0009074	aromatic amino acid family catabolic process	1/111	262/156071	0.170192	0.224712	0.186129	unigene-21666.106527	1	0	1
Biological process	GO:1903827	regulation of cellular protein localization	1/111	262/156071	0.170192	0.224712	0.186129	unigene-21666.230249	1	0	1
Biological process	GO:0015748	organophosphate ester transport	1/111	267/156071	0.173143	0.226247	0.1874	unigene-21666.131796	1	0	1
Biological process	GO:0071216	cellular response to biotic stimulus	1/111	268/156071	0.173733	0.226247	0.1874	unigene-21666.135213	1	0	1
Biological process	GO:0045047	protein targeting to ER	1/111	269/156071	0.174321	0.226247	0.1874	unigene-21666.45985	1	0	1
Biological process	GO:0072599	establishment of protein localization to endoplasmic reticulum	1/111	269/156071	0.174321	0.226247	0.1874	unigene-21666.45985	1	0	1
Biological process	GO:0019400	alditol metabolic process	1/111	271/156071	0.175497	0.226808	0.187865	unigene-2150.0	1	0	1
Biological process	GO:0015780	nucleotide-sugar transmembrane transport	1/111	275/156071	0.177844	0.227704	0.188607	unigene-21666.52281	1	0	1
Biological process	GO:0042335	cuticle development	1/111	276/156071	0.17843	0.227704	0.188607	unigene-21666.194916	1	0	1
Biological process	GO:0045732	positive regulation of protein catabolic process	1/111	276/156071	0.17843	0.227704	0.188607	unigene-21666.6440	1	0	1
Biological process	GO:0009825	multidimensional cell growth	1/111	280/156071	0.180769	0.228774	0.189494	unigene-21666.137096	1	0	1
Biological process	GO:0010025	wax biosynthetic process	1/111	280/156071	0.180769	0.228774	0.189494	unigene-21666.194916	1	0	1
Biological process	GO:0065001	specification of axis polarity	1/111	286/156071	0.184265	0.231609	0.191842	unigene-21666.135213	1	0	1
Biological process	GO:0009746	response to hexose	1/111	291/156071	0.187167	0.231609	0.191842	unigene-21666.37180	1	0	1
Biological process	GO:0072507	divalent inorganic cation homeostasis	1/111	291/156071	0.187167	0.231609	0.191842	unigene-21666.136397	1	0	1
Biological process	GO:0010162	seed dormancy process	1/111	292/156071	0.187746	0.231609	0.191842	unigene-21666.204466	1	0	1
Biological process	GO:0010166	wax metabolic process	1/111	292/156071	0.187746	0.231609	0.191842	unigene-21666.194916	1	0	1
Biological process	GO:0022611	dormancy process	1/111	292/156071	0.187746	0.231609	0.191842	unigene-21666.204466	1	0	1
Biological process	GO:0043562	cellular response to nitrogen levels	1/111	293/156071	0.188325	0.231609	0.191842	unigene-21666.157395	1	0	1
Biological process	GO:0032880	regulation of protein localization	1/111	298/156071	0.191213	0.23375	0.193615	unigene-21666.230249	1	0	1
Biological process	GO:0006568	tryptophan metabolic process	1/111	300/156071	0.192365	0.23375	0.193615	unigene-21666.106527	1	0	1
Biological process	GO:0006586	indolalkylamine metabolic process	1/111	300/156071	0.192365	0.23375	0.193615	unigene-21666.106527	1	0	1
Biological process	GO:0034284	response to monosaccharide	1/111	303/156071	0.19409	0.234167	0.19396	unigene-21666.37180	1	0	1
Biological process	GO:0050826	response to freezing	1/111	304/156071	0.194665	0.234167	0.19396	unigene-21666.230249	1	0	1
Biological process	GO:0032386	regulation of intracellular transport	1/111	307/156071	0.196385	0.234167	0.19396	unigene-21666.230249	1	0	1
Biological process	GO:0000075	cell cycle checkpoint	1/111	308/156071	0.196958	0.234167	0.19396	unigene-115886.1	1	0	1
Biological process	GO:0009407	toxin catabolic process	1/111	308/156071	0.196958	0.234167	0.19396	unigene-21666.245522	1	0	1
Biological process	GO:0010214	seed coat development	1/111	309/156071	0.19753	0.234167	0.19396	unigene-21666.135213	1	0	1
Biological process	GO:0042631	cellular response to water deprivation	1/111	312/156071	0.199244	0.234167	0.19396	unigene-21666.3197	1	0	1
Biological process	GO:0071462	cellular response to water stimulus	1/111	312/156071	0.199244	0.234167	0.19396	unigene-21666.3197	1	0	1
Biological process	GO:2001057	reactive nitrogen species metabolic process	1/111	313/156071	0.199815	0.234167	0.19396	unigene-21666.123452	1	0	1
Biological process	GO:1901570	fatty acid derivative biosynthetic process	1/111	314/156071	0.200385	0.234167	0.19396	unigene-21666.194916	1	0	1
Biological process	GO:0006892	post-Golgi vesicle-mediated transport	1/111	316/156071	0.201525	0.234599	0.194319	unigene-21666.32461	1	0	1
Biological process	GO:0042136	neurotransmitter biosynthetic process	1/111	318/156071	0.202662	0.235027	0.194673	unigene-21666.123452	1	0	1
Biological process	GO:0040011	locomotion	1/111	322/156071	0.204933	0.236759	0.196108	unigene-21666.122773	1	0	1
Biological process	GO:1901136	carbohydrate derivative catabolic process	1/111	326/156071	0.207197	0.238472	0.197526	unigene-21666.169831	1	0	1
Biological process	GO:0006108	malate metabolic process	1/111	329/156071	0.208891	0.239518	0.198393	unigene-21666.116988	1	0	1
Biological process	GO:0035966	response to topologically incorrect protein	1/111	331/156071	0.210018	0.239908	0.198716	unigene-21666.153137	1	0	1
Biological process	GO:0002237	response to molecule of bacterial origin	1/111	337/156071	0.21339	0.242851	0.201154	unigene-21666.230249	1	0	1
Biological process	GO:0010311	lateral root formation	1/111	341/156071	0.215631	0.244214	0.202283	unigene-21666.226134	1	0	1
Biological process	GO:0006855	drug transmembrane transport	1/111	342/156071	0.21619	0.244214	0.202283	unigene-21666.136688	1	0	1
Biological process	GO:0003333	amino acid transmembrane transport	1/111	349/156071	0.220092	0.247705	0.205174	unigene-21666.136688	1	0	1
Biological process	GO:0006612	protein targeting to membrane	1/111	361/156071	0.226737	0.25423	0.210579	unigene-21666.45985	1	0	1
Biological process	GO:0045927	positive regulation of growth	1/111	363/156071	0.22784	0.25423	0.210579	unigene-21666.135213	1	0	1
Biological process	GO:0045132	meiotic chromosome segregation	1/111	364/156071	0.22839	0.25423	0.210579	unigene-112344.1	1	0	1
Biological process	GO:0010091	trichome branching	1/111	368/156071	0.230588	0.254816	0.211064	unigene-21666.74750	1	0	1
Biological process	GO:1901568	fatty acid derivative metabolic process	1/111	368/156071	0.230588	0.254816	0.211064	unigene-21666.194916	1	0	1
Biological process	GO:0042537	benzene-containing compound metabolic process	1/111	372/156071	0.23278	0.25631	0.212301	unigene-21666.106527	1	0	1
Biological process	GO:0043650	dicarboxylic acid biosynthetic process	1/111	375/156071	0.234419	0.257187	0.213028	unigene-21666.55275	1	0	1
Biological process	GO:0070972	protein localization to endoplasmic reticulum	1/111	391/156071	0.243106	0.265626	0.220018	unigene-21666.45985	1	0	1
Biological process	GO:0006623	protein targeting to vacuole	1/111	394/156071	0.244724	0.265626	0.220018	unigene-21666.32461	1	0	1
Biological process	GO:0060627	regulation of vesicle-mediated transport	1/111	394/156071	0.244724	0.265626	0.220018	unigene-21666.157395	1	0	1
Biological process	GO:0042176	regulation of protein catabolic process	1/111	420/156071	0.258603	0.279694	0.231671	unigene-21666.6440	1	0	1
Biological process	GO:0009896	positive regulation of catabolic process	1/111	427/156071	0.262296	0.282686	0.234149	unigene-21666.6440	1	0	1
Biological process	GO:0000723	telomere maintenance	1/111	435/156071	0.266494	0.285196	0.236228	unigene-21666.82752	1	0	1
Biological process	GO:0032200	telomere organization	1/111	435/156071	0.266494	0.285196	0.236228	unigene-21666.82752	1	0	1
Biological process	GO:0031935	regulation of chromatin silencing	1/111	439/156071	0.268585	0.28543	0.236421	unigene-112344.1	1	0	1
Biological process	GO:0060249	anatomical structure homeostasis	1/111	439/156071	0.268585	0.28543	0.236421	unigene-21666.82752	1	0	1
Biological process	GO:0009404	toxin metabolic process	1/111	441/156071	0.269627	0.285543	0.236515	unigene-21666.245522	1	0	1
Biological process	GO:0016036	cellular response to phosphate starvation	1/111	449/156071	0.273785	0.28743	0.238078	unigene-21666.157395	1	0	1
Biological process	GO:0060341	regulation of cellular localization	1/111	451/156071	0.27482	0.28743	0.238078	unigene-21666.230249	1	0	1
Biological process	GO:0072665	protein localization to vacuole	1/111	454/156071	0.276371	0.28743	0.238078	unigene-21666.32461	1	0	1
Biological process	GO:0072666	establishment of protein localization to vacuole	1/111	454/156071	0.276371	0.28743	0.238078	unigene-21666.32461	1	0	1
Biological process	GO:0009798	axis specification	1/111	457/156071	0.277918	0.28743	0.238078	unigene-21666.135213	1	0	1
Biological process	GO:0010431	seed maturation	1/111	457/156071	0.277918	0.28743	0.238078	unigene-21666.204466	1	0	1
Biological process	GO:0010218	response to far red light	1/111	458/156071	0.278433	0.28743	0.238078	unigene-21666.2904	1	0	1
Biological process	GO:0009955	adaxial/abaxial pattern specification	1/111	459/156071	0.278948	0.28743	0.238078	unigene-21666.135213	1	0	1
Biological process	GO:0006865	amino acid transport	1/111	469/156071	0.284075	0.291727	0.241637	unigene-21666.136688	1	0	1
Biological process	GO:0001666	response to hypoxia	1/111	479/156071	0.289166	0.295616	0.244859	unigene-21666.135213	1	0	1
Biological process	GO:0031060	regulation of histone methylation	1/111	484/156071	0.291698	0.295616	0.244859	unigene-112344.1	1	0	1
Biological process	GO:0044743	protein transmembrane import into intracellular organelle	1/111	485/156071	0.292203	0.295616	0.244859	unigene-21666.163734	1	0	1
Biological process	GO:0007131	reciprocal meiotic recombination	1/111	486/156071	0.292708	0.295616	0.244859	unigene-112344.1	1	0	1
Biological process	GO:0035825	homologous recombination	1/111	486/156071	0.292708	0.295616	0.244859	unigene-112344.1	1	0	1
Biological process	GO:0000911	cytokinesis by cell plate formation	1/111	498/156071	0.29874	0.29974	0.248275	unigene-21666.137096	1	0	1
Biological process	GO:0007031	peroxisome organization	1/111	499/156071	0.29924	0.29974	0.248275	unigene-21666.163734	1	0	1
Biological process	GO:0009067	aspartate family amino acid biosynthetic process	1/111	500/156071	0.29974	0.29974	0.248275	unigene-21666.23092	1	0	1
