# Supplementary material for: RNA-seq and phytohormone analysis reveals the culm color variation of Bambusa oldhamii Munro
Source: PeerJ. 2022 Jan 13;10:e12796. doi: 10.7717/peerj.12796 (PMC8761368; doi:10.7717/peerj.12796)
Supplement: Supplemental Information 15 [file peerj-10-12796-s015.xlsx]

## Sheet: Sheet 1
Ontology	ID	Description	GeneRatio	BgRatio	pvalue	p.adjust	qvalue	geneID	Count	up	down
Cellular component	GO:0033588	Elongator holoenzyme complex	2/157	121/167039	0.00592223	0.0777604	0.0554488	unigene-21666.155085/unigene-21666.170933	2	2	0
Cellular component	GO:0016602	CCAAT-binding factor complex	2/157	135/167039	0.00731525	0.0777604	0.0554488	unigene-21666.71578/unigene-21666.166463	2	2	0
Cellular component	GO:0034045	phagophore assembly site membrane	2/157	137/167039	0.0075252	0.0777604	0.0554488	unigene-21666.82142/unigene-39477.3	2	2	0
Cellular component	GO:0009921	auxin efflux carrier complex	1/157	20/167039	0.0186321	0.11445	0.0816111	unigene-21666.190256	1	1	0
Cellular component	GO:0012511	monolayer-surrounded lipid storage body	1/157	23/167039	0.0213971	0.11445	0.0816111	unigene-21666.31989	1	1	0
Cellular component	GO:0000407	phagophore assembly site	2/157	267/167039	0.026499	0.11445	0.0816111	unigene-21666.82142/unigene-39477.3	2	2	0
Cellular component	GO:0005951	carbamoyl-phosphate synthase complex	1/157	30/167039	0.0278185	0.11445	0.0816111	unigene-21666.164649	1	1	0
Cellular component	GO:1902554	serine/threonine protein kinase complex	2/157	303/167039	0.0334053	0.11445	0.0816111	unigene-21666.229251/unigene-21666.89351	2	2	0
Cellular component	GO:1902911	protein kinase complex	2/157	316/167039	0.0360537	0.11445	0.0816111	unigene-21666.229251/unigene-21666.89351	2	2	0
Cellular component	GO:0048476	Holliday junction resolvase complex	1/157	40/167039	0.0369193	0.11445	0.0816111	unigene-21666.45647	1	1	0
Cellular component	GO:0005675	transcription factor TFIIH holo complex	1/157	92/167039	0.0828966	0.201788	0.14389	unigene-21666.229251	1	1	0
Cellular component	GO:0032806	carboxy-terminal domain protein kinase complex	1/157	92/167039	0.0828966	0.201788	0.14389	unigene-21666.229251	1	1	0
Cellular component	GO:0005811	lipid droplet	1/157	94/167039	0.0846207	0.201788	0.14389	unigene-21666.31989	1	1	0
Cellular component	GO:0031463	Cul3-RING ubiquitin ligase complex	1/157	105/167039	0.094046	0.208245	0.148494	unigene-21666.212035	1	1	0
Cellular component	GO:0042644	chloroplast nucleoid	1/157	130/167039	0.11511	0.213185	0.152016	unigene-21666.110099	1	1	0
Cellular component	GO:0098807	chloroplast thylakoid membrane protein complex	1/157	135/167039	0.119264	0.213185	0.152016	unigene-21666.150704	1	1	0
Cellular component	GO:0000307	cyclin-dependent protein kinase holoenzyme complex	1/157	145/167039	0.127514	0.213185	0.152016	unigene-21666.89351	1	1	0
Cellular component	GO:0016442	RISC complex	1/157	151/167039	0.132427	0.213185	0.152016	unigene-50694.0	1	1	0
Cellular component	GO:0031332	RNAi effector complex	1/157	151/167039	0.132427	0.213185	0.152016	unigene-50694.0	1	1	0
Cellular component	GO:0000322	storage vacuole	1/157	178/167039	0.154198	0.213185	0.152016	unigene-114620.2	1	1	0
Cellular component	GO:0000326	protein storage vacuole	1/157	178/167039	0.154198	0.213185	0.152016	unigene-114620.2	1	1	0
Cellular component	GO:0000178	exosome (RNase complex)	1/157	183/167039	0.158169	0.213185	0.152016	unigene-21666.230991	1	1	0
Cellular component	GO:1905354	exoribonuclease complex	1/157	183/167039	0.158169	0.213185	0.152016	unigene-21666.230991	1	1	0
Cellular component	GO:0005885	Arp2/3 protein complex	1/157	197/167039	0.169192	0.218539	0.155834	unigene-21666.104797	1	1	0
Cellular component	GO:0042646	plastid nucleoid	1/157	224/167039	0.190046	0.235657	0.16804	unigene-21666.110099	1	1	0
Cellular component	GO:0005852	eukaryotic translation initiation factor 3 complex	1/157	268/167039	0.222921	0.265791	0.189528	unigene-21666.212838	1	1	0
Cellular component	GO:0009295	nucleoid	1/157	283/167039	0.233823	0.268463	0.191434	unigene-21666.110099	1	1	0
Cellular component	GO:0005871	kinesin complex	1/157	307/167039	0.25095	0.277258	0.197706	unigene-21666.52	1	1	0
Cellular component	GO:0009501	amyloplast	1/157	319/167039	0.259371	0.277258	0.197706	unigene-21666.167280	1	1	0
Cellular component	GO:0030665	clathrin-coated vesicle membrane	1/157	373/167039	0.296114	0.305985	0.218189	unigene-21666.107450	1	1	0
Cellular component	GO:0019005	SCF ubiquitin ligase complex	1/157	462/167039	0.352761	0.352761	0.251544	unigene-21666.212035	1	1	0
Molecular function	GO:0045548	phenylalanine ammonia-lyase activity	3/155	58/180523	1.8502e-05	0.0027568	0.00206444	unigene-21666.113648/unigene-21666.90795/unigene-21666.218027	3	3	0
Molecular function	GO:0016841	ammonia-lyase activity	3/155	78/180523	4.50458e-05	0.00335591	0.00251308	unigene-21666.113648/unigene-21666.90795/unigene-21666.218027	3	3	0
Molecular function	GO:0003955	NAD(P)H dehydrogenase (quinone) activity	3/155	90/180523	6.9038e-05	0.00342889	0.00256773	unigene-70085.0/unigene-88322.0/unigene-21666.233474	3	3	0
Molecular function	GO:0045300	acyl-[acyl-carrier-protein] desaturase activity	2/155	32/180523	0.000357203	0.0133058	0.00996408	unigene-21666.149531/unigene-21666.149530	2	2	0
Molecular function	GO:0016717	oxidoreductase activity, acting on paired donors, with oxidation of a pair of donors resulting in the reduction of molecular oxygen to two molecules of water	3/155	222/180523	0.000973057	0.0275978	0.0206667	unigene-21666.149531/unigene-21666.149530/unigene-21666.183382	3	3	0
Molecular function	GO:0016840	carbon-nitrogen lyase activity	3/155	235/180523	0.00114571	0.0275978	0.0206667	unigene-21666.113648/unigene-21666.90795/unigene-21666.218027	3	3	0
Molecular function	GO:0080025	phosphatidylinositol-3,5-bisphosphate binding	2/155	61/180523	0.00129654	0.0275978	0.0206667	unigene-21666.82142/unigene-39477.3	2	2	0
Molecular function	GO:0032266	phosphatidylinositol-3-phosphate binding	2/155	79/180523	0.00216087	0.0402462	0.0301385	unigene-21666.82142/unigene-39477.3	2	2	0
Molecular function	GO:0050664	oxidoreductase activity, acting on NAD(P)H, oxygen as acceptor	2/155	121/180523	0.00497315	0.0823333	0.0616555	unigene-21666.48167/unigene-21666.75386	2	2	0
Molecular function	GO:1902936	phosphatidylinositol bisphosphate binding	2/155	133/180523	0.00597269	0.0889931	0.0666427	unigene-21666.82142/unigene-39477.3	2	2	0
Molecular function	GO:0016655	oxidoreductase activity, acting on NAD(P)H, quinone or similar compound as acceptor	3/155	471/180523	0.00801422	0.102402	0.0766838	unigene-70085.0/unigene-88322.0/unigene-21666.233474	3	3	0
Molecular function	GO:0009881	photoreceptor activity	3/155	476/180523	0.00824712	0.102402	0.0766838	unigene-21666.134539/unigene-21666.31056/unigene-37125.0	3	3	0
Molecular function	GO:0050072	m7G(5')pppN diphosphatase activity	1/155	12/180523	0.0102552	0.109145	0.0817331	unigene-21666.151362	1	1	0
Molecular function	GO:0052873	FMN reductase (NADPH) activity	1/155	12/180523	0.0102552	0.109145	0.0817331	unigene-88322.0	1	1	0
Molecular function	GO:0030332	cyclin binding	1/155	16/180523	0.0136503	0.121619	0.0910747	unigene-21666.89351	1	1	0
Molecular function	GO:1901981	phosphatidylinositol phosphate binding	2/155	205/180523	0.0136664	0.121619	0.0910747	unigene-21666.82142/unigene-39477.3	2	2	0
Molecular function	GO:0010331	gibberellin binding	1/155	18/180523	0.0153435	0.121619	0.0910747	unigene-21666.8827	1	1	0
Molecular function	GO:0050613	delta14-sterol reductase activity	1/155	21/180523	0.0178779	0.121619	0.0910747	unigene-21666.44722	1	1	0
Molecular function	GO:0004475	mannose-1-phosphate guanylyltransferase activity	1/155	22/180523	0.0187213	0.121619	0.0910747	unigene-21666.116766	1	1	0
Molecular function	GO:0019863	IgE binding	1/155	22/180523	0.0187213	0.121619	0.0910747	unigene-21666.167280	1	1	0
Molecular function	GO:0019865	immunoglobulin binding	1/155	22/180523	0.0187213	0.121619	0.0910747	unigene-21666.167280	1	1	0
Molecular function	GO:0016630	protochlorophyllide reductase activity	1/155	23/180523	0.019564	0.121619	0.0910747	unigene-21666.150221	1	1	0
Molecular function	GO:0061575	cyclin-dependent protein serine/threonine kinase activator activity	1/155	23/180523	0.019564	0.121619	0.0910747	unigene-21666.229251	1	1	0
Molecular function	GO:0005432	calcium:sodium antiporter activity	1/155	24/180523	0.0204059	0.121619	0.0910747	unigene-21666.216114	1	1	0
Molecular function	GO:0009702	L-arabinokinase activity	1/155	24/180523	0.0204059	0.121619	0.0910747	unigene-21666.192898	1	1	0
Molecular function	GO:0008429	phosphatidylethanolamine binding	1/155	26/180523	0.0220876	0.126579	0.0947888	unigene-54902.0	1	1	0
Molecular function	GO:0048257	3'-flap endonuclease activity	1/155	30/180523	0.0254424	0.140404	0.105142	unigene-21666.45647	1	1	0
Molecular function	GO:0016174	NAD(P)H oxidase activity	1/155	32/180523	0.0271155	0.141257	0.105781	unigene-21666.75386	1	1	0
Molecular function	GO:0017096	acetylserotonin O-methyltransferase activity	1/155	35/180523	0.0296198	0.141257	0.105781	unigene-21666.138128	1	1	0
Molecular function	GO:0008905	mannose-phosphate guanylyltransferase activity	1/155	38/180523	0.0321177	0.141257	0.105781	unigene-21666.116766	1	1	0
Molecular function	GO:0004088	carbamoyl-phosphate synthase (glutamine-hydrolyzing) activity	1/155	40/180523	0.0337794	0.141257	0.105781	unigene-21666.164649	1	1	0
Molecular function	GO:0004765	shikimate kinase activity	1/155	40/180523	0.0337794	0.141257	0.105781	unigene-21666.139074	1	1	0
Molecular function	GO:0018454	acetoacetyl-CoA reductase activity	1/155	43/180523	0.0362667	0.141257	0.105781	unigene-21666.41287	1	1	0
Molecular function	GO:0102339	3-oxo-arachidoyl-CoA reductase activity	1/155	43/180523	0.0362667	0.141257	0.105781	unigene-21666.41287	1	1	0
Molecular function	GO:0102340	3-oxo-behenoyl-CoA reductase activity	1/155	43/180523	0.0362667	0.141257	0.105781	unigene-21666.41287	1	1	0
Molecular function	GO:0102341	3-oxo-lignoceroyl-CoA reductase activity	1/155	43/180523	0.0362667	0.141257	0.105781	unigene-21666.41287	1	1	0
Molecular function	GO:0102342	3-oxo-cerotoyl-CoA reductase activity	1/155	43/180523	0.0362667	0.141257	0.105781	unigene-21666.41287	1	1	0
Molecular function	GO:0045703	ketoreductase activity	1/155	44/180523	0.0370944	0.141257	0.105781	unigene-21666.41287	1	1	0
Molecular function	GO:0009540	zeaxanthin epoxidase [overall] activity	1/155	45/180523	0.0379213	0.141257	0.105781	unigene-59003.0	1	1	0
Molecular function	GO:0009940	amino-terminal vacuolar sorting propeptide binding	1/155	45/180523	0.0379213	0.141257	0.105781	unigene-21666.107450	1	1	0
Molecular function	GO:0010997	anaphase-promoting complex binding	1/155	52/180523	0.0436904	0.158777	0.118901	unigene-21666.102436	1	1	0
Molecular function	GO:0036191	indolin-2-one monooxygenase activity	1/155	54/180523	0.0453324	0.160822	0.120432	unigene-21666.108859	1	1	0
Molecular function	GO:0016165	linoleate 13S-lipoxygenase activity	1/155	59/180523	0.0494251	0.171264	0.128251	unigene-21666.181183	1	1	0
Molecular function	GO:0010209	vacuolar sorting signal binding	1/155	63/180523	0.0526867	0.177146	0.132656	unigene-21666.107450	1	1	0
Molecular function	GO:0005534	galactose binding	1/155	64/180523	0.0535003	0.177146	0.132656	unigene-21666.192898	1	1	0
Molecular function	GO:0070401	NADP+ binding	1/155	71/180523	0.0591766	0.178742	0.133851	unigene-21666.87695	1	1	0
Molecular function	GO:0031406	carboxylic acid binding	2/155	463/180523	0.060617	0.178742	0.133851	unigene-21666.8827/unigene-21666.37244	2	2	0
Molecular function	GO:0043177	organic acid binding	2/155	463/180523	0.060617	0.178742	0.133851	unigene-21666.8827/unigene-21666.37244	2	2	0
Molecular function	GO:0008239	dipeptidyl-peptidase activity	1/155	73/180523	0.0607921	0.178742	0.133851	unigene-21666.158224	1	1	0
Molecular function	GO:0008422	beta-glucosidase activity	2/155	468/180523	0.0617654	0.178742	0.133851	unigene-21666.30596/unigene-21666.176139	2	2	0
Molecular function	GO:0008106	alcohol dehydrogenase (NADP+) activity	1/155	75/180523	0.0624049	0.178742	0.133851	unigene-21666.87695	1	1	0
Molecular function	GO:0016628	oxidoreductase activity, acting on the CH-CH group of donors, NAD or NADP as acceptor	2/155	479/180523	0.0643182	0.178742	0.133851	unigene-21666.150221/unigene-21666.44722	2	2	0
Molecular function	GO:0070696	transmembrane receptor protein serine/threonine kinase binding	1/155	78/180523	0.064819	0.178742	0.133851	unigene-21666.74173	1	1	0
Molecular function	GO:0009931	calcium-dependent protein serine/threonine kinase activity	2/155	488/180523	0.0664328	0.178742	0.133851	unigene-36425.0/unigene-21666.201638	2	2	0
Molecular function	GO:0010857	calcium-dependent protein kinase activity	2/155	488/180523	0.0664328	0.178742	0.133851	unigene-36425.0/unigene-21666.201638	2	2	0
Molecular function	GO:0015334	high-affinity oligopeptide transmembrane transporter activity	1/155	82/180523	0.0680281	0.178742	0.133851	unigene-21666.9593	1	1	0
Molecular function	GO:0004683	calmodulin-dependent protein kinase activity	2/155	500/180523	0.0692881	0.178742	0.133851	unigene-36425.0/unigene-21666.201638	2	2	0
Molecular function	GO:0004806	triglyceride lipase activity	1/155	89/180523	0.0736177	0.178742	0.133851	unigene-21666.31989	1	1	0
Molecular function	GO:0016762	xyloglucan:xyloglucosyl transferase activity	1/155	92/180523	0.0760031	0.178742	0.133851	unigene-43885.0	1	1	0
Molecular function	GO:0048256	flap endonuclease activity	1/155	93/180523	0.0767969	0.178742	0.133851	unigene-21666.45647	1	1	0
Molecular function	GO:0009011	starch synthase activity	1/155	94/180523	0.07759	0.178742	0.133851	unigene-21666.167280	1	1	0
Molecular function	GO:0016597	amino acid binding	1/155	94/180523	0.07759	0.178742	0.133851	unigene-21666.37244	1	1	0
Molecular function	GO:0019840	isoprenoid binding	1/155	94/180523	0.07759	0.178742	0.133851	unigene-21666.8827	1	1	0
Molecular function	GO:0016872	intramolecular lyase activity	1/155	96/180523	0.0791741	0.178742	0.133851	unigene-21666.248220	1	1	0
Molecular function	GO:0019209	kinase activator activity	1/155	96/180523	0.0791741	0.178742	0.133851	unigene-21666.229251	1	1	0
Molecular function	GO:0030295	protein kinase activator activity	1/155	96/180523	0.0791741	0.178742	0.133851	unigene-21666.229251	1	1	0
Molecular function	GO:0102229	amylopectin maltohydrolase activity	1/155	101/180523	0.0831226	0.184855	0.138429	unigene-21666.100803	1	1	0
Molecular function	GO:0004826	phenylalanine-tRNA ligase activity	1/155	108/180523	0.0886223	0.191971	0.143758	unigene-21666.86045	1	1	0
Molecular function	GO:0004033	aldo-keto reductase (NADP) activity	1/155	109/180523	0.0894053	0.191971	0.143758	unigene-21666.87695	1	1	0
Molecular function	GO:0016161	beta-amylase activity	1/155	110/180523	0.0901877	0.191971	0.143758	unigene-21666.100803	1	1	0
Molecular function	GO:0004742	dihydrolipoyllysine-residue acetyltransferase activity	1/155	118/180523	0.0964223	0.199541	0.149426	unigene-21666.21318	1	1	0
Molecular function	GO:0016418	S-acetyltransferase activity	1/155	118/180523	0.0964223	0.199541	0.149426	unigene-21666.21318	1	1	0
Molecular function	GO:0004373	glycogen (starch) synthase activity	1/155	123/180523	0.100297	0.201178	0.150653	unigene-21666.167280	1	1	0
Molecular function	GO:0030523	dihydrolipoamide S-acyltransferase activity	1/155	123/180523	0.100297	0.201178	0.150653	unigene-21666.21318	1	1	0
Molecular function	GO:0005471	ATP:ADP antiporter activity	1/155	126/180523	0.102614	0.201178	0.150653	unigene-93970.0	1	1	0
Molecular function	GO:0008802	betaine-aldehyde dehydrogenase activity	1/155	126/180523	0.102614	0.201178	0.150653	unigene-37713.0	1	1	0
Molecular function	GO:0015368	calcium:cation antiporter activity	1/155	130/180523	0.105695	0.204526	0.15316	unigene-21666.216114	1	1	0
Molecular function	GO:0070568	guanylyltransferase activity	1/155	137/180523	0.11106	0.209693	0.157029	unigene-21666.116766	1	1	0
Molecular function	GO:0010333	terpene synthase activity	1/155	138/180523	0.111824	0.209693	0.157029	unigene-21666.127581	1	1	0
Molecular function	GO:0042937	tripeptide transmembrane transporter activity	1/155	139/180523	0.112587	0.209693	0.157029	unigene-21666.9593	1	1	0
Molecular function	GO:0016646	oxidoreductase activity, acting on the CH-NH group of donors, NAD or NADP as acceptor	1/155	142/180523	0.114872	0.211309	0.158239	unigene-88322.0	1	1	0
Molecular function	GO:0016621	cinnamoyl-CoA reductase activity	1/155	144/180523	0.116393	0.211495	0.158378	unigene-21666.144320	1	1	0
Molecular function	GO:0033612	receptor serine/threonine kinase binding	1/155	154/180523	0.123957	0.222525	0.166638	unigene-21666.74173	1	1	0
Molecular function	GO:0016160	amylase activity	1/155	156/180523	0.125462	0.222545	0.166653	unigene-21666.100803	1	1	0
Molecular function	GO:0010329	auxin efflux transmembrane transporter activity	1/155	163/180523	0.130709	0.226261	0.169436	unigene-21666.190256	1	1	0
Molecular function	GO:0080161	auxin transmembrane transporter activity	1/155	165/180523	0.132203	0.226261	0.169436	unigene-21666.190256	1	1	0
Molecular function	GO:0016229	steroid dehydrogenase activity	1/155	166/180523	0.132948	0.226261	0.169436	unigene-21666.87695	1	1	0
Molecular function	GO:0000285	1-phosphatidylinositol-3-phosphate 5-kinase activity	1/155	170/180523	0.135925	0.226261	0.169436	unigene-21666.11606	1	1	0
Molecular function	GO:0004525	ribonuclease III activity	1/155	171/180523	0.136668	0.226261	0.169436	unigene-50694.0	1	1	0
Molecular function	GO:0032296	double-stranded RNA-specific ribonuclease activity	1/155	171/180523	0.136668	0.226261	0.169436	unigene-50694.0	1	1	0
Molecular function	GO:0015562	efflux transmembrane transporter activity	1/155	176/180523	0.140371	0.229839	0.172115	unigene-21666.190256	1	1	0
Molecular function	GO:0016884	carbon-nitrogen ligase activity, with glutamine as amido-N-donor	1/155	183/180523	0.14553	0.235566	0.176404	unigene-21666.164649	1	1	0
Molecular function	GO:0016538	cyclin-dependent protein serine/threonine kinase regulator activity	1/155	186/180523	0.147731	0.235566	0.176404	unigene-21666.229251	1	1	0
Molecular function	GO:0016889	endodeoxyribonuclease activity, producing 3'-phosphomonoesters	1/155	190/180523	0.150657	0.235566	0.176404	unigene-21666.45647	1	1	0
Molecular function	GO:0015217	ADP transmembrane transporter activity	1/155	192/180523	0.152117	0.235566	0.176404	unigene-93970.0	1	1	0
Molecular function	GO:0035673	oligopeptide transmembrane transporter activity	1/155	192/180523	0.152117	0.235566	0.176404	unigene-21666.9593	1	1	0
Molecular function	GO:0016838	carbon-oxygen lyase activity, acting on phosphates	1/155	194/180523	0.153574	0.235566	0.176404	unigene-21666.127581	1	1	0
Molecular function	GO:0015081	sodium ion transmembrane transporter activity	1/155	196/180523	0.155028	0.235566	0.176404	unigene-21666.216114	1	1	0
Molecular function	GO:0001046	core promoter sequence-specific DNA binding	1/155	201/180523	0.158654	0.235566	0.176404	unigene-21666.15994	1	1	0
Molecular function	GO:0001047	core promoter binding	1/155	202/180523	0.159377	0.235566	0.176404	unigene-21666.15994	1	1	0
Molecular function	GO:0005347	ATP transmembrane transporter activity	1/155	205/180523	0.161543	0.235566	0.176404	unigene-93970.0	1	1	0
Molecular function	GO:0102483	scopolin beta-glucosidase activity	1/155	206/180523	0.162263	0.235566	0.176404	unigene-21666.176139	1	1	0
Molecular function	GO:0042562	hormone binding	1/155	208/180523	0.163703	0.235566	0.176404	unigene-21666.8827	1	1	0
Molecular function	GO:0016894	endonuclease activity, active with either ribo- or deoxyribonucleic acids and producing 3'-phosphomonoesters	1/155	209/180523	0.164422	0.235566	0.176404	unigene-21666.45647	1	1	0
Molecular function	GO:0042973	glucan endo-1,3-beta-D-glucosidase activity	1/155	215/180523	0.168722	0.239174	0.179106	unigene-21666.30596	1	1	0
Molecular function	GO:0008198	ferrous iron binding	1/155	217/180523	0.170151	0.239174	0.179106	unigene-21666.183486	1	1	0
Molecular function	GO:0008171	O-methyltransferase activity	1/155	231/180523	0.180083	0.25077	0.187789	unigene-21666.138128	1	1	0
Molecular function	GO:0000175	3'-5'-exoribonuclease activity	1/155	246/180523	0.190593	0.260536	0.195103	unigene-21666.230991	1	1	0
Molecular function	GO:0008353	RNA polymerase II CTD heptapeptide repeat kinase activity	1/155	246/180523	0.190593	0.260536	0.195103	unigene-21666.89351	1	1	0
Molecular function	GO:0015301	anion:anion antiporter activity	1/155	249/180523	0.192679	0.260993	0.195445	unigene-93970.0	1	1	0
Molecular function	GO:0004520	endodeoxyribonuclease activity	1/155	253/180523	0.195452	0.262364	0.196472	unigene-21666.45647	1	1	0
Molecular function	GO:0000295	adenine nucleotide transmembrane transporter activity	1/155	266/180523	0.204399	0.264831	0.198319	unigene-93970.0	1	1	0
Molecular function	GO:0005346	purine ribonucleotide transmembrane transporter activity	1/155	266/180523	0.204399	0.264831	0.198319	unigene-93970.0	1	1	0
Molecular function	GO:0015216	purine nucleotide transmembrane transporter activity	1/155	266/180523	0.204399	0.264831	0.198319	unigene-93970.0	1	1	0
Molecular function	GO:0016645	oxidoreductase activity, acting on the CH-NH group of donors	1/155	266/180523	0.204399	0.264831	0.198319	unigene-88322.0	1	1	0
Molecular function	GO:0016413	O-acetyltransferase activity	1/155	276/180523	0.211214	0.271301	0.203164	unigene-22925.0	1	1	0
Molecular function	GO:0030145	manganese ion binding	1/155	284/180523	0.216625	0.275872	0.206588	unigene-21666.151362	1	1	0
Molecular function	GO:0015215	nucleotide transmembrane transporter activity	1/155	295/180523	0.224004	0.282852	0.211814	unigene-93970.0	1	1	0
Molecular function	GO:0004709	MAP kinase kinase kinase activity	1/155	308/180523	0.232635	0.291283	0.218127	unigene-21666.42719	1	1	0
Molecular function	GO:0016307	phosphatidylinositol phosphate kinase activity	1/155	314/180523	0.236587	0.293649	0.219899	unigene-21666.11606	1	1	0
Molecular function	GO:0004030	aldehyde dehydrogenase [NAD(P)+] activity	1/155	319/180523	0.239864	0.293649	0.219899	unigene-37713.0	1	1	0
Molecular function	GO:0031072	heat shock protein binding	1/155	329/180523	0.246377	0.293649	0.219899	unigene-21666.147134	1	1	0
Molecular function	GO:0004536	deoxyribonuclease activity	1/155	330/180523	0.247025	0.293649	0.219899	unigene-21666.45647	1	1	0
Molecular function	GO:1904680	peptide transmembrane transporter activity	1/155	331/180523	0.247673	0.293649	0.219899	unigene-21666.9593	1	1	0
Molecular function	GO:0015491	cation:cation antiporter activity	1/155	332/180523	0.24832	0.293649	0.219899	unigene-21666.216114	1	1	0
Molecular function	GO:0043022	ribosome binding	1/155	332/180523	0.24832	0.293649	0.219899	unigene-21666.212838	1	1	0
Molecular function	GO:0004532	exoribonuclease activity	1/155	340/180523	0.253478	0.295064	0.220959	unigene-21666.230991	1	1	0
Molecular function	GO:0016896	exoribonuclease activity, producing 5'-phosphomonoesters	1/155	340/180523	0.253478	0.295064	0.220959	unigene-21666.230991	1	1	0
Molecular function	GO:0001134	transcription regulator recruiting activity	1/155	348/180523	0.2586	0.296395	0.221956	unigene-21666.15994	1	1	0
Molecular function	GO:0001135	RNA polymerase II transcription regulator recruiting activity	1/155	348/180523	0.2586	0.296395	0.221956	unigene-21666.15994	1	1	0
Molecular function	GO:0004499	N,N-dimethylaniline monooxygenase activity	1/155	372/180523	0.273758	0.311373	0.233172	unigene-21666.225108	1	1	0
Molecular function	GO:0015605	organophosphate ester transmembrane transporter activity	1/155	376/180523	0.276254	0.311832	0.233516	unigene-93970.0	1	1	0
Molecular function	GO:0071949	FAD binding	1/155	381/180523	0.279362	0.31297	0.234368	unigene-59003.0	1	1	0
Molecular function	GO:0016702	oxidoreductase activity, acting on single donors with incorporation of molecular oxygen, incorporation of two atoms of oxygen	1/155	392/180523	0.286154	0.316866	0.237285	unigene-21666.181183	1	1	0
Molecular function	GO:0005200	structural constituent of cytoskeleton	1/155	395/180523	0.287995	0.316866	0.237285	unigene-21666.104797	1	1	0
Molecular function	GO:0005102	signaling receptor binding	1/155	397/180523	0.28922	0.316866	0.237285	unigene-21666.74173	1	1	0
Molecular function	GO:0048029	monosaccharide binding	1/155	405/180523	0.294098	0.319445	0.239217	unigene-21666.192898	1	1	0
Molecular function	GO:0004693	cyclin-dependent protein serine/threonine kinase activity	1/155	414/180523	0.299547	0.319445	0.239217	unigene-21666.89351	1	1	0
Molecular function	GO:0097472	cyclin-dependent protein kinase activity	1/155	414/180523	0.299547	0.319445	0.239217	unigene-21666.89351	1	1	0
Molecular function	GO:0015298	solute:cation antiporter activity	1/155	415/180523	0.300149	0.319445	0.239217	unigene-21666.216114	1	1	0
Molecular function	GO:0042887	amide transmembrane transporter activity	1/155	421/180523	0.303755	0.320238	0.239811	unigene-21666.9593	1	1	0
Molecular function	GO:0019207	kinase regulator activity	1/155	427/180523	0.307343	0.320238	0.239811	unigene-21666.229251	1	1	0
Molecular function	GO:0019887	protein kinase regulator activity	1/155	427/180523	0.307343	0.320238	0.239811	unigene-21666.229251	1	1	0
Molecular function	GO:0004177	aminopeptidase activity	1/155	446/180523	0.318583	0.329645	0.246855	unigene-21666.158224	1	1	0
Molecular function	GO:0016796	exonuclease activity, active with either ribo- or deoxyribonucleic acids and producing 5'-phosphomonoesters	1/155	454/180523	0.323261	0.332179	0.248753	unigene-21666.230991	1	1	0
Molecular function	GO:0000049	tRNA binding	1/155	461/180523	0.327328	0.334054	0.250157	unigene-21666.86045	1	1	0
Molecular function	GO:0005048	signal sequence binding	1/155	468/180523	0.331371	0.334769	0.250692	unigene-21666.107450	1	1	0
Molecular function	GO:0051015	actin filament binding	1/155	470/180523	0.332522	0.334769	0.250692	unigene-21666.104797	1	1	0
Molecular function	GO:0008408	3'-5' exonuclease activity	1/155	491/180523	0.344486	0.344486	0.257969	unigene-21666.230991	1	1	0
Biological process	GO:0009800	cinnamic acid biosynthetic process	3/140	61/156071	2.44723e-05	0.00395228	0.0031814	unigene-21666.113648/unigene-21666.90795/unigene-21666.218027	3	3	0
Biological process	GO:0009803	cinnamic acid metabolic process	3/140	61/156071	2.44723e-05	0.00395228	0.0031814	unigene-21666.113648/unigene-21666.90795/unigene-21666.218027	3	3	0
Biological process	GO:0006559	L-phenylalanine catabolic process	3/140	134/156071	0.000254138	0.0205216	0.016519	unigene-21666.113648/unigene-21666.90795/unigene-21666.218027	3	3	0
Biological process	GO:1902222	erythrose 4-phosphate/phosphoenolpyruvate family amino acid catabolic process	3/140	134/156071	0.000254138	0.0205216	0.016519	unigene-21666.113648/unigene-21666.90795/unigene-21666.218027	3	3	0
Biological process	GO:0009649	entrainment of circadian clock	3/140	222/156071	0.00110081	0.0711121	0.0572419	unigene-21666.134539/unigene-21666.31056/unigene-37125.0	3	3	0
Biological process	GO:0009074	aromatic amino acid family catabolic process	3/140	262/156071	0.00176655	0.0861066	0.0693118	unigene-21666.113648/unigene-21666.90795/unigene-21666.218027	3	3	0
Biological process	GO:0006558	L-phenylalanine metabolic process	3/140	280/156071	0.00213267	0.0861066	0.0693118	unigene-21666.113648/unigene-21666.90795/unigene-21666.218027	3	3	0
Biological process	GO:1902221	erythrose 4-phosphate/phosphoenolpyruvate family amino acid metabolic process	3/140	280/156071	0.00213267	0.0861066	0.0693118	unigene-21666.113648/unigene-21666.90795/unigene-21666.218027	3	3	0
Biological process	GO:0034497	protein localization to phagophore assembly site	2/140	108/156071	0.00433743	0.152568	0.12281	unigene-21666.82142/unigene-39477.3	2	2	0
Biological process	GO:0042537	benzene-containing compound metabolic process	3/140	372/156071	0.00472347	0.152568	0.12281	unigene-21666.113648/unigene-21666.90795/unigene-21666.218027	3	3	0
Biological process	GO:0010597	green leaf volatile biosynthetic process	1/140	10/156071	0.00893441	0.208346	0.167709	unigene-21666.181183	1	1	0
Biological process	GO:0019372	lipoxygenase pathway	1/140	10/156071	0.00893441	0.208346	0.167709	unigene-21666.181183	1	1	0
Biological process	GO:0000422	autophagy of mitochondrion	2/140	177/156071	0.0112309	0.208346	0.167709	unigene-21666.82142/unigene-39477.3	2	2	0
Biological process	GO:0061726	mitochondrion disassembly	2/140	177/156071	0.0112309	0.208346	0.167709	unigene-21666.82142/unigene-39477.3	2	2	0
Biological process	GO:0051513	regulation of monopolar cell growth	1/140	13/156071	0.0115992	0.208346	0.167709	unigene-11517.0	1	1	0
Biological process	GO:0008284	positive regulation of cell proliferation	2/140	186/156071	0.0123406	0.208346	0.167709	unigene-21666.89351/unigene-21666.170933	2	2	0
Biological process	GO:0009958	positive gravitropism	2/140	188/156071	0.0125935	0.208346	0.167709	unigene-21666.126192/unigene-21666.5523	2	2	0
Biological process	GO:0044804	autophagy of nucleus	2/140	194/156071	0.0133656	0.208346	0.167709	unigene-21666.82142/unigene-39477.3	2	2	0
Biological process	GO:0031537	regulation of anthocyanin metabolic process	2/140	200/156071	0.0141578	0.208346	0.167709	unigene-21666.126192/unigene-21666.170933	2	2	0
Biological process	GO:0010325	raffinose family oligosaccharide biosynthetic process	1/140	16/156071	0.014257	0.208346	0.167709	unigene-21666.8827	1	1	0
Biological process	GO:0010389	regulation of G2/M transition of mitotic cell cycle	2/140	216/156071	0.016367	0.208346	0.167709	unigene-21666.45647/unigene-21666.89351	2	2	0
Biological process	GO:1902749	regulation of cell cycle G2/M phase transition	2/140	220/156071	0.0169408	0.208346	0.167709	unigene-21666.45647/unigene-21666.89351	2	2	0
Biological process	GO:1903008	organelle disassembly	2/140	221/156071	0.0170856	0.208346	0.167709	unigene-21666.82142/unigene-39477.3	2	2	0
Biological process	GO:0000086	G2/M transition of mitotic cell cycle	2/140	228/156071	0.0181138	0.208346	0.167709	unigene-21666.45647/unigene-21666.89351	2	2	0
Biological process	GO:0043692	monoterpene metabolic process	1/140	21/156071	0.0186707	0.208346	0.167709	unigene-21666.127581	1	1	0
Biological process	GO:0043693	monoterpene biosynthetic process	1/140	21/156071	0.0186707	0.208346	0.167709	unigene-21666.127581	1	1	0
Biological process	GO:0044839	cell cycle G2/M phase transition	2/140	232/156071	0.0187129	0.208346	0.167709	unigene-21666.45647/unigene-21666.89351	2	2	0
Biological process	GO:0006690	icosanoid metabolic process	1/140	22/156071	0.0195511	0.208346	0.167709	unigene-21666.181183	1	1	0
Biological process	GO:0018107	peptidyl-threonine phosphorylation	2/140	243/156071	0.020403	0.208346	0.167709	unigene-21666.201747/unigene-21666.125206	2	2	0
Biological process	GO:0018210	peptidyl-threonine modification	2/140	243/156071	0.020403	0.208346	0.167709	unigene-21666.201747/unigene-21666.125206	2	2	0
Biological process	GO:0019433	triglyceride catabolic process	1/140	26/156071	0.0230649	0.208346	0.167709	unigene-21666.31989	1	1	0
Biological process	GO:0046461	neutral lipid catabolic process	1/140	26/156071	0.0230649	0.208346	0.167709	unigene-21666.31989	1	1	0
Biological process	GO:0046464	acylglycerol catabolic process	1/140	26/156071	0.0230649	0.208346	0.167709	unigene-21666.31989	1	1	0
Biological process	GO:0048830	adventitious root development	1/140	27/156071	0.0239414	0.208346	0.167709	unigene-21666.190256	1	1	0
Biological process	GO:0043069	negative regulation of programmed cell death	2/140	266/156071	0.0241331	0.208346	0.167709	unigene-21666.74173/unigene-21666.75386	2	2	0
Biological process	GO:0060320	rejection of self pollen	1/140	30/156071	0.0265662	0.208346	0.167709	unigene-21666.151960	1	1	0
Biological process	GO:0031573	intra-S DNA damage checkpoint	1/140	32/156071	0.0283121	0.208346	0.167709	unigene-21666.45647	1	1	0
Biological process	GO:0006915	apoptotic process	1/140	35/156071	0.0309252	0.208346	0.167709	unigene-21666.74173	1	1	0
Biological process	GO:0033383	geranyl diphosphate metabolic process	1/140	35/156071	0.0309252	0.208346	0.167709	unigene-21666.127581	1	1	0
Biological process	GO:0042981	regulation of apoptotic process	1/140	35/156071	0.0309252	0.208346	0.167709	unigene-21666.74173	1	1	0
Biological process	GO:0043066	negative regulation of apoptotic process	1/140	35/156071	0.0309252	0.208346	0.167709	unigene-21666.74173	1	1	0
Biological process	GO:0046503	glycerolipid catabolic process	1/140	36/156071	0.0317947	0.208346	0.167709	unigene-21666.31989	1	1	0
Biological process	GO:0000045	autophagosome assembly	2/140	310/156071	0.0319716	0.208346	0.167709	unigene-21666.82142/unigene-39477.3	2	2	0
Biological process	GO:0048506	regulation of timing of meristematic phase transition	2/140	311/156071	0.03216	0.208346	0.167709	unigene-54902.0/unigene-21666.144630	2	2	0
Biological process	GO:0048510	regulation of timing of transition from vegetative to reproductive phase	2/140	311/156071	0.03216	0.208346	0.167709	unigene-54902.0/unigene-21666.144630	2	2	0
Biological process	GO:0000727	double-strand break repair via break-induced replication	1/140	37/156071	0.0326634	0.208346	0.167709	unigene-21666.45647	1	1	0
Biological process	GO:0031297	replication fork processing	1/140	37/156071	0.0326634	0.208346	0.167709	unigene-21666.45647	1	1	0
Biological process	GO:0042814	monopolar cell growth	1/140	38/156071	0.0335313	0.208346	0.167709	unigene-11517.0	1	1	0
Biological process	GO:0006857	oligopeptide transport	2/140	322/156071	0.034261	0.208346	0.167709	unigene-21666.9593/unigene-21666.95932	2	2	0
Biological process	GO:0009298	GDP-mannose biosynthetic process	1/140	39/156071	0.0343985	0.208346	0.167709	unigene-21666.116766	1	1	0
Biological process	GO:0010158	abaxial cell fate specification	1/140	41/156071	0.0361305	0.208346	0.167709	unigene-21666.232945	1	1	0
Biological process	GO:0010239	chloroplast mRNA processing	1/140	42/156071	0.0369953	0.208346	0.167709	unigene-21666.110099	1	1	0
Biological process	GO:2000652	regulation of secondary cell wall biogenesis	1/140	42/156071	0.0369953	0.208346	0.167709	unigene-21666.15994	1	1	0
Biological process	GO:0002679	respiratory burst involved in defense response	1/140	43/156071	0.0378594	0.208346	0.167709	unigene-21666.75386	1	1	0
Biological process	GO:0006497	protein lipidation	2/140	343/156071	0.0384156	0.208346	0.167709	unigene-21666.82142/unigene-39477.3	2	2	0
Biological process	GO:0042158	lipoprotein biosynthetic process	2/140	343/156071	0.0384156	0.208346	0.167709	unigene-21666.82142/unigene-39477.3	2	2	0
Biological process	GO:0019673	GDP-mannose metabolic process	1/140	44/156071	0.0387227	0.208346	0.167709	unigene-21666.116766	1	1	0
Biological process	GO:1901990	regulation of mitotic cell cycle phase transition	2/140	347/156071	0.0392277	0.208346	0.167709	unigene-21666.45647/unigene-21666.89351	2	2	0
Biological process	GO:0042754	negative regulation of circadian rhythm	1/140	45/156071	0.0395852	0.208346	0.167709	unigene-21666.144320	1	1	0
Biological process	GO:0042793	plastid transcription	1/140	46/156071	0.040447	0.208346	0.167709	unigene-21666.221188	1	1	0
Biological process	GO:0010229	inflorescence development	2/140	357/156071	0.0412865	0.208346	0.167709	unigene-21666.232945/unigene-54902.0	2	2	0
Biological process	GO:1901002	positive regulation of response to salt stress	2/140	358/156071	0.0414946	0.208346	0.167709	unigene-36425.0/unigene-21666.15994	2	2	0
Biological process	GO:1901987	regulation of cell cycle phase transition	2/140	362/156071	0.0423309	0.208346	0.167709	unigene-21666.45647/unigene-21666.89351	2	2	0
Biological process	GO:0071470	cellular response to osmotic stress	2/140	363/156071	0.042541	0.208346	0.167709	unigene-21666.75386/unigene-21666.183873	2	2	0
Biological process	GO:0007231	osmosensory signaling pathway	1/140	49/156071	0.0430277	0.208346	0.167709	unigene-21666.75386	1	1	0
Biological process	GO:0010262	somatic embryogenesis	1/140	52/156071	0.0456015	0.208346	0.167709	unigene-21666.71578	1	1	0
Biological process	GO:0030186	melatonin metabolic process	1/140	52/156071	0.0456015	0.208346	0.167709	unigene-21666.138128	1	1	0
Biological process	GO:0030187	melatonin biosynthetic process	1/140	52/156071	0.0456015	0.208346	0.167709	unigene-21666.138128	1	1	0
Biological process	GO:1905037	autophagosome organization	2/140	379/156071	0.045955	0.208346	0.167709	unigene-21666.82142/unigene-39477.3	2	2	0
Biological process	GO:0071484	cellular response to light intensity	1/140	53/156071	0.0464579	0.208346	0.167709	unigene-21666.109007	1	1	0
Biological process	GO:0042157	lipoprotein metabolic process	2/140	385/156071	0.0472605	0.208346	0.167709	unigene-21666.82142/unigene-39477.3	2	2	0
Biological process	GO:0007095	mitotic G2 DNA damage checkpoint	1/140	54/156071	0.0473136	0.208346	0.167709	unigene-21666.45647	1	1	0
Biological process	GO:0031572	G2 DNA damage checkpoint	1/140	54/156071	0.0473136	0.208346	0.167709	unigene-21666.45647	1	1	0
Biological process	GO:0000050	urea cycle	1/140	55/156071	0.0481685	0.208346	0.167709	unigene-21666.164649	1	1	0
Biological process	GO:0060548	negative regulation of cell death	2/140	392/156071	0.0488007	0.208346	0.167709	unigene-21666.74173/unigene-21666.75386	2	2	0
Biological process	GO:0044773	mitotic DNA damage checkpoint	1/140	56/156071	0.0490226	0.208346	0.167709	unigene-21666.45647	1	1	0
Biological process	GO:0040034	regulation of development, heterochronic	2/140	401/156071	0.0508074	0.213127	0.171557	unigene-54902.0/unigene-21666.144630	2	2	0
Biological process	GO:0046246	terpene biosynthetic process	1/140	59/156071	0.0515804	0.213596	0.171935	unigene-21666.127581	1	1	0
Biological process	GO:0031538	negative regulation of anthocyanin metabolic process	1/140	61/156071	0.0532818	0.217848	0.175358	unigene-21666.170933	1	1	0
Biological process	GO:0019627	urea metabolic process	1/140	65/156071	0.0566755	0.219155	0.17641	unigene-21666.164649	1	1	0
Biological process	GO:0010117	photoprotection	1/140	66/156071	0.057522	0.219155	0.17641	unigene-21666.109007	1	1	0
Biological process	GO:0010972	negative regulation of G2/M transition of mitotic cell cycle	1/140	68/156071	0.0592129	0.219155	0.17641	unigene-21666.45647	1	1	0
Biological process	GO:0044818	mitotic G2/M transition checkpoint	1/140	68/156071	0.0592129	0.219155	0.17641	unigene-21666.45647	1	1	0
Biological process	GO:0045730	respiratory burst	1/140	68/156071	0.0592129	0.219155	0.17641	unigene-21666.75386	1	1	0
Biological process	GO:1902750	negative regulation of cell cycle G2/M phase transition	1/140	68/156071	0.0592129	0.219155	0.17641	unigene-21666.45647	1	1	0
Biological process	GO:0048497	maintenance of floral organ identity	1/140	69/156071	0.0600571	0.219155	0.17641	unigene-21666.141343	1	1	0
Biological process	GO:0090700	maintenance of plant organ identity	1/140	69/156071	0.0600571	0.219155	0.17641	unigene-21666.141343	1	1	0
Biological process	GO:0044772	mitotic cell cycle phase transition	2/140	443/156071	0.0605499	0.219155	0.17641	unigene-21666.45647/unigene-21666.89351	2	2	0
Biological process	GO:0044205	'de novo' UMP biosynthetic process	1/140	71/156071	0.0617434	0.219155	0.17641	unigene-21666.164649	1	1	0
Biological process	GO:0046621	negative regulation of organ growth	1/140	71/156071	0.0617434	0.219155	0.17641	unigene-21666.102436	1	1	0
Biological process	GO:2000035	regulation of stem cell division	1/140	71/156071	0.0617434	0.219155	0.17641	unigene-21666.144630	1	1	0
Biological process	GO:0019632	shikimate metabolic process	1/140	72/156071	0.0625855	0.219729	0.176872	unigene-21666.139074	1	1	0
Biological process	GO:0031539	positive regulation of anthocyanin metabolic process	1/140	74/156071	0.0642673	0.221513	0.178308	unigene-21666.126192	1	1	0
Biological process	GO:0044774	mitotic DNA integrity checkpoint	1/140	75/156071	0.065107	0.221513	0.178308	unigene-21666.45647	1	1	0
Biological process	GO:0043067	regulation of programmed cell death	2/140	462/156071	0.065151	0.221513	0.178308	unigene-21666.74173/unigene-21666.75386	2	2	0
Biological process	GO:0044770	cell cycle phase transition	2/140	467/156071	0.0663808	0.222385	0.17901	unigene-21666.45647/unigene-21666.89351	2	2	0
Biological process	GO:0051503	adenine nucleotide transport	1/140	77/156071	0.0667843	0.222385	0.17901	unigene-93970.0	1	1	0
Biological process	GO:0017145	stem cell division	1/140	80/156071	0.0692947	0.225226	0.181297	unigene-21666.144630	1	1	0
Biological process	GO:0010215	cellulose microfibril organization	1/140	82/156071	0.0709646	0.225226	0.181297	unigene-21666.210727	1	1	0
Biological process	GO:0030198	extracellular matrix organization	1/140	82/156071	0.0709646	0.225226	0.181297	unigene-21666.210727	1	1	0
Biological process	GO:0016236	macroautophagy	2/140	486/156071	0.0711241	0.225226	0.181297	unigene-21666.82142/unigene-39477.3	2	2	0
Biological process	GO:0046283	anthocyanin-containing compound metabolic process	2/140	486/156071	0.0711241	0.225226	0.181297	unigene-21666.126192/unigene-21666.170933	2	2	0
Biological process	GO:0000082	G1/S transition of mitotic cell cycle	1/140	84/156071	0.0726314	0.227767	0.183341	unigene-21666.89351	1	1	0
Biological process	GO:0009939	positive regulation of gibberellic acid mediated signaling pathway	1/140	87/156071	0.0751262	0.231102	0.186027	unigene-21666.8827	1	1	0
Biological process	GO:0050665	hydrogen peroxide biosynthetic process	1/140	87/156071	0.0751262	0.231102	0.186027	unigene-21666.75386	1	1	0
Biological process	GO:0042214	terpene metabolic process	1/140	88/156071	0.0759563	0.231452	0.186308	unigene-21666.127581	1	1	0
Biological process	GO:0045005	DNA-dependent DNA replication maintenance of fidelity	1/140	90/156071	0.0776143	0.234294	0.188595	unigene-21666.45647	1	1	0
Biological process	GO:0046902	regulation of mitochondrial membrane permeability	1/140	93/156071	0.0800957	0.237348	0.191054	unigene-93970.0	1	1	0
Biological process	GO:0090559	regulation of membrane permeability	1/140	93/156071	0.0800957	0.237348	0.191054	unigene-93970.0	1	1	0
Biological process	GO:0048640	negative regulation of developmental growth	1/140	96/156071	0.0825705	0.242457	0.195167	unigene-21666.102436	1	1	0
Biological process	GO:0043062	extracellular structure organization	1/140	102/156071	0.0875003	0.250704	0.201805	unigene-21666.210727	1	1	0
Biological process	GO:0045596	negative regulation of cell differentiation	1/140	104/156071	0.0891377	0.250704	0.201805	unigene-21666.141343	1	1	0
Biological process	GO:0070726	cell wall assembly	1/140	105/156071	0.0899553	0.250704	0.201805	unigene-21666.210727	1	1	0
Biological process	GO:0071668	plant-type cell wall assembly	1/140	105/156071	0.0899553	0.250704	0.201805	unigene-21666.210727	1	1	0
Biological process	GO:0006432	phenylalanyl-tRNA aminoacylation	1/140	106/156071	0.0907722	0.250704	0.201805	unigene-21666.86045	1	1	0
Biological process	GO:0044843	cell cycle G1/S phase transition	1/140	106/156071	0.0907722	0.250704	0.201805	unigene-21666.89351	1	1	0
Biological process	GO:0000712	resolution of meiotic recombination intermediates	1/140	107/156071	0.0915884	0.250704	0.201805	unigene-21666.45647	1	1	0
Biological process	GO:0006207	'de novo' pyrimidine nucleobase biosynthetic process	1/140	107/156071	0.0915884	0.250704	0.201805	unigene-21666.164649	1	1	0
Biological process	GO:0010072	primary shoot apical meristem specification	1/140	108/156071	0.0924038	0.25081	0.201891	unigene-21666.151362	1	1	0
Biological process	GO:0051307	meiotic chromosome separation	1/140	110/156071	0.0940325	0.253104	0.203737	unigene-21666.45647	1	1	0
Biological process	GO:0015865	purine nucleotide transport	1/140	114/156071	0.0972811	0.259684	0.209034	unigene-93970.0	1	1	0
Biological process	GO:0046620	regulation of organ growth	1/140	116/156071	0.0989011	0.261845	0.210773	unigene-21666.102436	1	1	0
Biological process	GO:0055074	calcium ion homeostasis	1/140	119/156071	0.101326	0.266083	0.214184	unigene-21666.216114	1	1	0
Biological process	GO:0009773	photosynthetic electron transport in photosystem I	1/140	124/156071	0.105352	0.274426	0.2209	unigene-21666.109007	1	1	0
Biological process	GO:0009410	response to xenobiotic stimulus	1/140	130/156071	0.110161	0.284655	0.229134	unigene-21666.23232	1	1	0
Biological process	GO:0010411	xyloglucan metabolic process	1/140	134/156071	0.113352	0.285016	0.229424	unigene-43885.0	1	1	0
Biological process	GO:0009750	response to fructose	1/140	136/156071	0.114943	0.285016	0.229424	unigene-21666.144630	1	1	0
Biological process	GO:0000077	DNA damage checkpoint	1/140	140/156071	0.118117	0.285016	0.229424	unigene-21666.45647	1	1	0
Biological process	GO:0009423	chorismate biosynthetic process	1/140	140/156071	0.118117	0.285016	0.229424	unigene-21666.139074	1	1	0
Biological process	GO:0000290	deadenylation-dependent decapping of nuclear-transcribed mRNA	1/140	142/156071	0.1197	0.285016	0.229424	unigene-21666.151362	1	1	0
Biological process	GO:0006222	UMP biosynthetic process	1/140	142/156071	0.1197	0.285016	0.229424	unigene-21666.164649	1	1	0
Biological process	GO:0009174	pyrimidine ribonucleoside monophosphate biosynthetic process	1/140	142/156071	0.1197	0.285016	0.229424	unigene-21666.164649	1	1	0
Biological process	GO:0046049	UMP metabolic process	1/140	142/156071	0.1197	0.285016	0.229424	unigene-21666.164649	1	1	0
Biological process	GO:0009173	pyrimidine ribonucleoside monophosphate metabolic process	1/140	143/156071	0.120491	0.285016	0.229424	unigene-21666.164649	1	1	0
Biological process	GO:0006526	arginine biosynthetic process	1/140	144/156071	0.12128	0.285016	0.229424	unigene-21666.164649	1	1	0
Biological process	GO:0031425	chloroplast RNA processing	1/140	147/156071	0.123645	0.285016	0.229424	unigene-21666.110099	1	1	0
Biological process	GO:0042938	dipeptide transport	1/140	152/156071	0.127572	0.285016	0.229424	unigene-21666.9593	1	1	0
Biological process	GO:0006577	amino-acid betaine metabolic process	1/140	153/156071	0.128356	0.285016	0.229424	unigene-37713.0	1	1	0
Biological process	GO:0006578	amino-acid betaine biosynthetic process	1/140	153/156071	0.128356	0.285016	0.229424	unigene-37713.0	1	1	0
Biological process	GO:0019285	glycine betaine biosynthetic process from choline	1/140	153/156071	0.128356	0.285016	0.229424	unigene-37713.0	1	1	0
Biological process	GO:0031455	glycine betaine metabolic process	1/140	153/156071	0.128356	0.285016	0.229424	unigene-37713.0	1	1	0
Biological process	GO:0031456	glycine betaine biosynthetic process	1/140	153/156071	0.128356	0.285016	0.229424	unigene-37713.0	1	1	0
Biological process	GO:0090421	embryonic meristem initiation	1/140	155/156071	0.12992	0.285016	0.229424	unigene-21666.151362	1	1	0
Biological process	GO:0042939	tripeptide transport	1/140	157/156071	0.131482	0.285016	0.229424	unigene-21666.9593	1	1	0
Biological process	GO:0006446	regulation of translational initiation	1/140	160/156071	0.13382	0.285016	0.229424	unigene-21666.212838	1	1	0
Biological process	GO:0006641	triglyceride metabolic process	1/140	160/156071	0.13382	0.285016	0.229424	unigene-21666.31989	1	1	0
Biological process	GO:0009556	microsporogenesis	1/140	163/156071	0.136151	0.285016	0.229424	unigene-21666.102436	1	1	0
Biological process	GO:0002098	tRNA wobble uridine modification	1/140	164/156071	0.136927	0.285016	0.229424	unigene-21666.155085	1	1	0
Biological process	GO:2000069	regulation of post-embryonic root development	1/140	166/156071	0.138476	0.285016	0.229424	unigene-21666.144630	1	1	0
Biological process	GO:0000463	maturation of LSU-rRNA from tricistronic rRNA transcript (SSU-rRNA, 5.8S rRNA, LSU-rRNA)	1/140	167/156071	0.13925	0.285016	0.229424	unigene-21666.211778	1	1	0
Biological process	GO:0006862	nucleotide transport	1/140	168/156071	0.140022	0.285016	0.229424	unigene-93970.0	1	1	0
Biological process	GO:0045926	negative regulation of growth	1/140	168/156071	0.140022	0.285016	0.229424	unigene-21666.102436	1	1	0
Biological process	GO:0071281	cellular response to iron ion	1/140	168/156071	0.140022	0.285016	0.229424	unigene-21666.144630	1	1	0
Biological process	GO:1903338	regulation of cell wall organization or biogenesis	1/140	170/156071	0.141566	0.285016	0.229424	unigene-21666.15994	1	1	0
Biological process	GO:1901988	negative regulation of cell cycle phase transition	1/140	172/156071	0.143107	0.285016	0.229424	unigene-21666.45647	1	1	0
Biological process	GO:1901991	negative regulation of mitotic cell cycle phase transition	1/140	172/156071	0.143107	0.285016	0.229424	unigene-21666.45647	1	1	0
Biological process	GO:0017000	antibiotic biosynthetic process	1/140	175/156071	0.145414	0.285016	0.229424	unigene-21666.75386	1	1	0
Biological process	GO:0035265	organ growth	1/140	175/156071	0.145414	0.285016	0.229424	unigene-21666.102436	1	1	0
Biological process	GO:0009785	blue light signaling pathway	1/140	176/156071	0.146181	0.285016	0.229424	unigene-21666.71578	1	1	0
Biological process	GO:0030522	intracellular receptor signaling pathway	1/140	176/156071	0.146181	0.285016	0.229424	unigene-21666.71578	1	1	0
Biological process	GO:0006638	neutral lipid metabolic process	1/140	177/156071	0.146948	0.285016	0.229424	unigene-21666.31989	1	1	0
Biological process	GO:0006639	acylglycerol metabolic process	1/140	177/156071	0.146948	0.285016	0.229424	unigene-21666.31989	1	1	0
Biological process	GO:0009130	pyrimidine nucleoside monophosphate biosynthetic process	1/140	177/156071	0.146948	0.285016	0.229424	unigene-21666.164649	1	1	0
Biological process	GO:0009129	pyrimidine nucleoside monophosphate metabolic process	1/140	178/156071	0.147714	0.285016	0.229424	unigene-21666.164649	1	1	0
Biological process	GO:0009686	gibberellin biosynthetic process	1/140	178/156071	0.147714	0.285016	0.229424	unigene-21666.144630	1	1	0
Biological process	GO:0046417	chorismate metabolic process	1/140	178/156071	0.147714	0.285016	0.229424	unigene-21666.139074	1	1	0
Biological process	GO:0042761	very long-chain fatty acid biosynthetic process	1/140	179/156071	0.14848	0.285016	0.229424	unigene-21666.41287	1	1	0
Biological process	GO:0010105	negative regulation of ethylene-activated signaling pathway	1/140	181/156071	0.150008	0.285016	0.229424	unigene-21666.144630	1	1	0
Biological process	GO:0031570	DNA integrity checkpoint	1/140	181/156071	0.150008	0.285016	0.229424	unigene-21666.45647	1	1	0
Biological process	GO:0070298	negative regulation of phosphorelay signal transduction system	1/140	181/156071	0.150008	0.285016	0.229424	unigene-21666.144630	1	1	0
Biological process	GO:0019695	choline metabolic process	1/140	184/156071	0.152296	0.285258	0.22962	unigene-37713.0	1	1	0
Biological process	GO:0007006	mitochondrial membrane organization	1/140	190/156071	0.156854	0.285258	0.22962	unigene-93970.0	1	1	0
Biological process	GO:0019048	modulation by virus of host morphology or physiology	1/140	190/156071	0.156854	0.285258	0.22962	unigene-21666.151362	1	1	0
Biological process	GO:0019856	pyrimidine nucleobase biosynthetic process	1/140	190/156071	0.156854	0.285258	0.22962	unigene-21666.164649	1	1	0
Biological process	GO:0052542	defense response by callose deposition	1/140	190/156071	0.156854	0.285258	0.22962	unigene-21666.75386	1	1	0
Biological process	GO:0034293	sexual sporulation	1/140	191/156071	0.157611	0.285258	0.22962	unigene-21666.102436	1	1	0
Biological process	GO:0043934	sporulation	1/140	191/156071	0.157611	0.285258	0.22962	unigene-21666.102436	1	1	0
Biological process	GO:0048236	plant-type sporogenesis	1/140	191/156071	0.157611	0.285258	0.22962	unigene-21666.102436	1	1	0
Biological process	GO:0009688	abscisic acid biosynthetic process	1/140	195/156071	0.160633	0.285258	0.22962	unigene-59003.0	1	1	0
Biological process	GO:0043289	apocarotenoid biosynthetic process	1/140	195/156071	0.160633	0.285258	0.22962	unigene-59003.0	1	1	0
Biological process	GO:1902645	tertiary alcohol biosynthetic process	1/140	195/156071	0.160633	0.285258	0.22962	unigene-59003.0	1	1	0
Biological process	GO:0009635	response to herbicide	1/140	198/156071	0.162893	0.285258	0.22962	unigene-21666.23232	1	1	0
Biological process	GO:0009685	gibberellin metabolic process	1/140	199/156071	0.163645	0.285258	0.22962	unigene-21666.144630	1	1	0
Biological process	GO:0007093	mitotic cell cycle checkpoint	1/140	202/156071	0.165897	0.285258	0.22962	unigene-21666.45647	1	1	0
Biological process	GO:0010014	meristem initiation	1/140	204/156071	0.167394	0.285258	0.22962	unigene-21666.151362	1	1	0
Biological process	GO:0045930	negative regulation of mitotic cell cycle	1/140	205/156071	0.168142	0.285258	0.22962	unigene-21666.45647	1	1	0
Biological process	GO:0000038	very long-chain fatty acid metabolic process	1/140	208/156071	0.170382	0.285258	0.22962	unigene-21666.41287	1	1	0
Biological process	GO:0006896	Golgi to vacuole transport	1/140	209/156071	0.171127	0.285258	0.22962	unigene-21666.107450	1	1	0
Biological process	GO:0034314	Arp2/3 complex-mediated actin nucleation	1/140	210/156071	0.171871	0.285258	0.22962	unigene-21666.104797	1	1	0
Biological process	GO:0006525	arginine metabolic process	1/140	211/156071	0.172615	0.285258	0.22962	unigene-21666.164649	1	1	0
Biological process	GO:0006636	unsaturated fatty acid biosynthetic process	1/140	211/156071	0.172615	0.285258	0.22962	unigene-21666.183382	1	1	0
Biological process	GO:0002097	tRNA wobble base modification	1/140	212/156071	0.173358	0.285258	0.22962	unigene-21666.155085	1	1	0
Biological process	GO:0006613	cotranslational protein targeting to membrane	1/140	213/156071	0.174101	0.285258	0.22962	unigene-21666.110436	1	1	0
Biological process	GO:0033559	unsaturated fatty acid metabolic process	1/140	213/156071	0.174101	0.285258	0.22962	unigene-21666.183382	1	1	0
Biological process	GO:0071483	cellular response to blue light	1/140	215/156071	0.175584	0.285258	0.22962	unigene-21666.71578	1	1	0
Biological process	GO:1902532	negative regulation of intracellular signal transduction	1/140	216/156071	0.176324	0.285258	0.22962	unigene-21666.144630	1	1	0
Biological process	GO:0030838	positive regulation of actin filament polymerization	1/140	218/156071	0.177804	0.285258	0.22962	unigene-21666.104797	1	1	0
Biological process	GO:0045010	actin nucleation	1/140	218/156071	0.177804	0.285258	0.22962	unigene-21666.104797	1	1	0
Biological process	GO:0016102	diterpenoid biosynthetic process	1/140	219/156071	0.178542	0.285258	0.22962	unigene-21666.144630	1	1	0
Biological process	GO:0031086	nuclear-transcribed mRNA catabolic process, deadenylation-independent decay	1/140	220/156071	0.17928	0.285258	0.22962	unigene-21666.151362	1	1	0
Biological process	GO:0031087	deadenylation-independent decapping of nuclear-transcribed mRNA	1/140	220/156071	0.17928	0.285258	0.22962	unigene-21666.151362	1	1	0
Biological process	GO:0033500	carbohydrate homeostasis	1/140	220/156071	0.17928	0.285258	0.22962	unigene-21666.75386	1	1	0
Biological process	GO:0042753	positive regulation of circadian rhythm	1/140	220/156071	0.17928	0.285258	0.22962	unigene-21666.126192	1	1	0
Biological process	GO:0009687	abscisic acid metabolic process	1/140	226/156071	0.183694	0.288025	0.231846	unigene-59003.0	1	1	0
Biological process	GO:0043288	apocarotenoid metabolic process	1/140	226/156071	0.183694	0.288025	0.231846	unigene-59003.0	1	1	0
Biological process	GO:1902644	tertiary alcohol metabolic process	1/140	226/156071	0.183694	0.288025	0.231846	unigene-59003.0	1	1	0
Biological process	GO:0010252	auxin homeostasis	1/140	228/156071	0.18516	0.288921	0.232568	unigene-21666.190256	1	1	0
Biological process	GO:0016106	sesquiterpenoid biosynthetic process	1/140	230/156071	0.186623	0.289547	0.233072	unigene-59003.0	1	1	0
Biological process	GO:0006071	glycerol metabolic process	1/140	231/156071	0.187354	0.289547	0.233072	unigene-21666.31989	1	1	0
Biological process	GO:0009937	regulation of gibberellic acid mediated signaling pathway	1/140	241/156071	0.194625	0.297514	0.239485	unigene-21666.8827	1	1	0
Biological process	GO:0032273	positive regulation of protein polymerization	1/140	241/156071	0.194625	0.297514	0.239485	unigene-21666.104797	1	1	0
Biological process	GO:0010039	response to iron ion	1/140	245/156071	0.197515	0.297514	0.239485	unigene-21666.144630	1	1	0
Biological process	GO:0010104	regulation of ethylene-activated signaling pathway	1/140	247/156071	0.198957	0.297514	0.239485	unigene-21666.144630	1	1	0
Biological process	GO:0046112	nucleobase biosynthetic process	1/140	247/156071	0.198957	0.297514	0.239485	unigene-21666.164649	1	1	0
Biological process	GO:0051304	chromosome separation	1/140	247/156071	0.198957	0.297514	0.239485	unigene-21666.45647	1	1	0
Biological process	GO:0070297	regulation of phosphorelay signal transduction system	1/140	247/156071	0.198957	0.297514	0.239485	unigene-21666.144630	1	1	0
Biological process	GO:0052545	callose localization	1/140	249/156071	0.200395	0.297851	0.239756	unigene-21666.75386	1	1	0
Biological process	GO:0033037	polysaccharide localization	1/140	250/156071	0.201114	0.297851	0.239756	unigene-21666.75386	1	1	0
Biological process	GO:1903409	reactive oxygen species biosynthetic process	1/140	254/156071	0.203981	0.297851	0.239756	unigene-21666.75386	1	1	0
Biological process	GO:0001708	cell fate specification	1/140	255/156071	0.204696	0.297851	0.239756	unigene-21666.232945	1	1	0
Biological process	GO:0071472	cellular response to salt stress	1/140	256/156071	0.205411	0.297851	0.239756	unigene-21666.183873	1	1	0
Biological process	GO:0048572	short-day photoperiodism	1/140	258/156071	0.206838	0.297851	0.239756	unigene-54902.0	1	1	0
Biological process	GO:0048575	short-day photoperiodism, flowering	1/140	258/156071	0.206838	0.297851	0.239756	unigene-54902.0	1	1	0
Biological process	GO:0006714	sesquiterpenoid metabolic process	1/140	261/156071	0.208974	0.297851	0.239756	unigene-59003.0	1	1	0
Biological process	GO:0051495	positive regulation of cytoskeleton organization	1/140	264/156071	0.211105	0.297851	0.239756	unigene-21666.104797	1	1	0
Biological process	GO:1902905	positive regulation of supramolecular fiber organization	1/140	264/156071	0.211105	0.297851	0.239756	unigene-21666.104797	1	1	0
Biological process	GO:0031407	oxylipin metabolic process	1/140	265/156071	0.211813	0.297851	0.239756	unigene-21666.181183	1	1	0
Biological process	GO:0031408	oxylipin biosynthetic process	1/140	265/156071	0.211813	0.297851	0.239756	unigene-21666.181183	1	1	0
Biological process	GO:0010099	regulation of photomorphogenesis	1/140	267/156071	0.213229	0.297851	0.239756	unigene-21666.126192	1	1	0
Biological process	GO:0015748	organophosphate ester transport	1/140	267/156071	0.213229	0.297851	0.239756	unigene-93970.0	1	1	0
Biological process	GO:0016101	diterpenoid metabolic process	1/140	267/156071	0.213229	0.297851	0.239756	unigene-21666.144630	1	1	0
Biological process	GO:0034754	cellular hormone metabolic process	1/140	268/156071	0.213936	0.297851	0.239756	unigene-21666.138128	1	1	0
Biological process	GO:0071248	cellular response to metal ion	1/140	270/156071	0.215348	0.298227	0.240059	unigene-21666.144630	1	1	0
Biological process	GO:0019400	alditol metabolic process	1/140	271/156071	0.216053	0.298227	0.240059	unigene-21666.31989	1	1	0
Biological process	GO:0045732	positive regulation of protein catabolic process	1/140	276/156071	0.219569	0.301791	0.242928	unigene-21666.102436	1	1	0
Biological process	GO:0051510	regulation of unidimensional cell growth	1/140	279/156071	0.221671	0.303389	0.244214	unigene-11517.0	1	1	0
Biological process	GO:1900426	positive regulation of defense response to bacterium	1/140	286/156071	0.226554	0.307015	0.247133	unigene-21666.122250	1	1	0
Biological process	GO:0009820	alkaloid metabolic process	1/140	290/156071	0.229331	0.307015	0.247133	unigene-21666.231610	1	1	0
Biological process	GO:0009218	pyrimidine ribonucleotide metabolic process	1/140	291/156071	0.230023	0.307015	0.247133	unigene-21666.164649	1	1	0
Biological process	GO:0009220	pyrimidine ribonucleotide biosynthetic process	1/140	291/156071	0.230023	0.307015	0.247133	unigene-21666.164649	1	1	0
Biological process	GO:0009746	response to hexose	1/140	291/156071	0.230023	0.307015	0.247133	unigene-21666.144630	1	1	0
Biological process	GO:0072507	divalent inorganic cation homeostasis	1/140	291/156071	0.230023	0.307015	0.247133	unigene-21666.216114	1	1	0
Biological process	GO:0034284	response to monosaccharide	1/140	303/156071	0.238287	0.315052	0.253602	unigene-21666.144630	1	1	0
Biological process	GO:0046132	pyrimidine ribonucleoside biosynthetic process	1/140	304/156071	0.238971	0.315052	0.253602	unigene-21666.164649	1	1	0
Biological process	GO:0070417	cellular response to cold	1/140	304/156071	0.238971	0.315052	0.253602	unigene-21666.51712	1	1	0
Biological process	GO:0048508	embryonic meristem development	1/140	306/156071	0.240339	0.315567	0.254016	unigene-21666.151362	1	1	0
Biological process	GO:0000075	cell cycle checkpoint	1/140	308/156071	0.241704	0.316074	0.254425	unigene-21666.45647	1	1	0
Biological process	GO:0042631	cellular response to water deprivation	1/140	312/156071	0.244426	0.316676	0.254909	unigene-21666.183873	1	1	0
Biological process	GO:0071462	cellular response to water stimulus	1/140	312/156071	0.244426	0.316676	0.254909	unigene-21666.183873	1	1	0
Biological process	GO:0006206	pyrimidine nucleobase metabolic process	1/140	313/156071	0.245105	0.316676	0.254909	unigene-21666.164649	1	1	0
Biological process	GO:0050777	negative regulation of immune response	1/140	315/156071	0.246462	0.316769	0.254985	unigene-21666.74173	1	1	0
Biological process	GO:0006892	post-Golgi vesicle-mediated transport	1/140	316/156071	0.247139	0.316769	0.254985	unigene-21666.107450	1	1	0
Biological process	GO:0046131	pyrimidine ribonucleoside metabolic process	1/140	321/156071	0.250516	0.319829	0.257448	unigene-21666.164649	1	1	0
Biological process	GO:0044003	modification by symbiont of host morphology or physiology	1/140	331/156071	0.257226	0.327103	0.263303	unigene-21666.151362	1	1	0
Biological process	GO:0046134	pyrimidine nucleoside biosynthetic process	1/140	334/156071	0.259228	0.327913	0.263955	unigene-21666.164649	1	1	0
Biological process	GO:0010948	negative regulation of cell cycle process	1/140	335/156071	0.259894	0.327913	0.263955	unigene-21666.45647	1	1	0
Biological process	GO:0009767	photosynthetic electron transport chain	1/140	338/156071	0.261888	0.329143	0.264945	unigene-21666.109007	1	1	0
Biological process	GO:0002683	negative regulation of immune system process	1/140	342/156071	0.264538	0.329907	0.26556	unigene-21666.74173	1	1	0
Biological process	GO:0006855	drug transmembrane transport	1/140	342/156071	0.264538	0.329907	0.26556	unigene-95563.0	1	1	0
Biological process	GO:0051817	modification of morphology or physiology of other organism involved in symbiotic interaction	1/140	344/156071	0.26586	0.33028	0.26586	unigene-21666.151362	1	1	0
Biological process	GO:0071941	nitrogen cycle metabolic process	1/140	349/156071	0.269154	0.333091	0.268123	unigene-21666.164649	1	1	0
Biological process	GO:0006213	pyrimidine nucleoside metabolic process	1/140	360/156071	0.27635	0.338831	0.272744	unigene-21666.164649	1	1	0
Biological process	GO:0006612	protein targeting to membrane	1/140	361/156071	0.277	0.338831	0.272744	unigene-21666.110436	1	1	0
Biological process	GO:0030422	production of siRNA involved in RNA interference	1/140	362/156071	0.277651	0.338831	0.272744	unigene-50694.0	1	1	0
Biological process	GO:0045132	meiotic chromosome segregation	1/140	364/156071	0.278949	0.338831	0.272744	unigene-21666.45647	1	1	0
Biological process	GO:0009226	nucleotide-sugar biosynthetic process	1/140	367/156071	0.280892	0.338831	0.272744	unigene-21666.116766	1	1	0
Biological process	GO:0009834	plant-type secondary cell wall biogenesis	1/140	368/156071	0.281539	0.338831	0.272744	unigene-21666.15994	1	1	0
Biological process	GO:1901568	fatty acid derivative metabolic process	1/140	368/156071	0.281539	0.338831	0.272744	unigene-21666.181183	1	1	0
Biological process	GO:0000288	nuclear-transcribed mRNA catabolic process, deadenylation-dependent decay	1/140	369/156071	0.282185	0.338831	0.272744	unigene-21666.151362	1	1	0
Biological process	GO:0043650	dicarboxylic acid biosynthetic process	1/140	375/156071	0.286049	0.341701	0.275054	unigene-21666.139074	1	1	0
Biological process	GO:0019252	starch biosynthetic process	1/140	376/156071	0.286691	0.341701	0.275054	unigene-21666.167280	1	1	0
Biological process	GO:0035821	modification of morphology or physiology of other organism	1/140	380/156071	0.289253	0.342243	0.275489	unigene-21666.151362	1	1	0
Biological process	GO:0006890	retrograde vesicle-mediated transport, Golgi to ER	1/140	382/156071	0.29053	0.342243	0.275489	unigene-21666.200082	1	1	0
Biological process	GO:0071241	cellular response to inorganic substance	1/140	382/156071	0.29053	0.342243	0.275489	unigene-21666.144630	1	1	0
Biological process	GO:0042435	indole-containing compound biosynthetic process	1/140	384/156071	0.291806	0.342243	0.275489	unigene-21666.138128	1	1	0
Biological process	GO:0048444	floral organ morphogenesis	1/140	385/156071	0.292443	0.342243	0.275489	unigene-21666.8827	1	1	0
Biological process	GO:0002833	positive regulation of response to biotic stimulus	1/140	387/156071	0.293715	0.34249	0.275689	unigene-21666.122250	1	1	0
Biological process	GO:0030833	regulation of actin filament polymerization	1/140	390/156071	0.295618	0.342712	0.275867	unigene-21666.104797	1	1	0
Biological process	GO:0030041	actin filament polymerization	1/140	391/156071	0.296252	0.342712	0.275867	unigene-21666.104797	1	1	0
Biological process	GO:0006413	translational initiation	1/140	393/156071	0.297517	0.342712	0.275867	unigene-21666.212838	1	1	0
Biological process	GO:0006623	protein targeting to vacuole	1/140	394/156071	0.298149	0.342712	0.275867	unigene-21666.107450	1	1	0
Biological process	GO:0043902	positive regulation of multi-organism process	1/140	401/156071	0.302555	0.345418	0.278045	unigene-21666.122250	1	1	0
Biological process	GO:0000470	maturation of LSU-rRNA	1/140	406/156071	0.305686	0.345418	0.278045	unigene-21666.211778	1	1	0
Biological process	GO:0045595	regulation of cell differentiation	1/140	406/156071	0.305686	0.345418	0.278045	unigene-21666.141343	1	1	0
Biological process	GO:2000030	regulation of response to red or far red light	1/140	409/156071	0.307557	0.345418	0.278045	unigene-21666.126192	1	1	0
Biological process	GO:0032271	regulation of protein polymerization	1/140	413/156071	0.310045	0.345418	0.278045	unigene-21666.104797	1	1	0
Biological process	GO:0008064	regulation of actin polymerization or depolymerization	1/140	415/156071	0.311286	0.345418	0.278045	unigene-21666.104797	1	1	0
Biological process	GO:0030832	regulation of actin filament length	1/140	415/156071	0.311286	0.345418	0.278045	unigene-21666.104797	1	1	0
Biological process	GO:0042398	cellular modified amino acid biosynthetic process	1/140	415/156071	0.311286	0.345418	0.278045	unigene-37713.0	1	1	0
Biological process	GO:0110053	regulation of actin filament organization	1/140	415/156071	0.311286	0.345418	0.278045	unigene-21666.104797	1	1	0
Biological process	GO:0032103	positive regulation of response to external stimulus	1/140	417/156071	0.312524	0.345418	0.278045	unigene-21666.122250	1	1	0
Biological process	GO:0032147	activation of protein kinase activity	1/140	420/156071	0.314377	0.345418	0.278045	unigene-21666.42719	1	1	0
Biological process	GO:0042176	regulation of protein catabolic process	1/140	420/156071	0.314377	0.345418	0.278045	unigene-21666.102436	1	1	0
Biological process	GO:0016246	RNA interference	1/140	422/156071	0.31561	0.345418	0.278045	unigene-50694.0	1	1	0
Biological process	GO:0010114	response to red light	1/140	426/156071	0.318069	0.345418	0.278045	unigene-21666.126192	1	1	0
Biological process	GO:0032956	regulation of actin cytoskeleton organization	1/140	426/156071	0.318069	0.345418	0.278045	unigene-21666.104797	1	1	0
Biological process	GO:0032970	regulation of actin filament-based process	1/140	426/156071	0.318069	0.345418	0.278045	unigene-21666.104797	1	1	0
Biological process	GO:0009896	positive regulation of catabolic process	1/140	427/156071	0.318683	0.345418	0.278045	unigene-21666.102436	1	1	0
Biological process	GO:0009744	response to sucrose	1/140	438/156071	0.325394	0.350994	0.282534	unigene-21666.144630	1	1	0
Biological process	GO:0045165	cell fate commitment	1/140	439/156071	0.326001	0.350994	0.282534	unigene-21666.232945	1	1	0
Biological process	GO:0006289	nucleotide-excision repair	1/140	441/156071	0.327213	0.351128	0.282642	unigene-21666.229251	1	1	0
Biological process	GO:0034285	response to disaccharide	1/140	446/156071	0.330233	0.3525	0.283746	unigene-21666.144630	1	1	0
Biological process	GO:0031098	stress-activated protein kinase signaling cascade	1/140	447/156071	0.330836	0.3525	0.283746	unigene-21666.42719	1	1	0
Biological process	GO:0016036	cellular response to phosphate starvation	1/140	449/156071	0.332039	0.3525	0.283746	unigene-21666.164649	1	1	0
Biological process	GO:0042455	ribonucleoside biosynthetic process	1/140	453/156071	0.33444	0.3525	0.283746	unigene-21666.164649	1	1	0
Biological process	GO:0072665	protein localization to vacuole	1/140	454/156071	0.335038	0.3525	0.283746	unigene-21666.107450	1	1	0
Biological process	GO:0072666	establishment of protein localization to vacuole	1/140	454/156071	0.335038	0.3525	0.283746	unigene-21666.107450	1	1	0
Biological process	GO:0010218	response to far red light	1/140	458/156071	0.337428	0.353861	0.284842	unigene-21666.126192	1	1	0
Biological process	GO:0009225	nucleotide-sugar metabolic process	1/140	463/156071	0.340403	0.355826	0.286423	unigene-21666.116766	1	1	0
Biological process	GO:0042147	retrograde transport, endosome to Golgi	1/140	465/156071	0.34159	0.355914	0.286495	unigene-21666.11606	1	1	0
Biological process	GO:1900424	regulation of defense response to bacterium	1/140	473/156071	0.346314	0.358592	0.28865	unigene-21666.122250	1	1	0
Biological process	GO:0051701	interaction with host	1/140	474/156071	0.346902	0.358592	0.28865	unigene-21666.151362	1	1	0
Biological process	GO:0090332	stomatal closure	1/140	475/156071	0.34749	0.358592	0.28865	unigene-21666.11606	1	1	0
Biological process	GO:0001666	response to hypoxia	1/140	479/156071	0.349835	0.359484	0.289368	unigene-21666.144630	1	1	0
Biological process	GO:0031334	positive regulation of protein complex assembly	1/140	481/156071	0.351004	0.359484	0.289368	unigene-21666.104797	1	1	0
Biological process	GO:0009163	nucleoside biosynthetic process	1/140	483/156071	0.352172	0.359484	0.289368	unigene-21666.164649	1	1	0
Biological process	GO:0007131	reciprocal meiotic recombination	1/140	486/156071	0.353919	0.359484	0.289368	unigene-21666.45647	1	1	0
Biological process	GO:0035825	homologous recombination	1/140	486/156071	0.353919	0.359484	0.289368	unigene-21666.45647	1	1	0
Biological process	GO:2000280	regulation of root development	1/140	488/156071	0.355081	0.359534	0.289408	unigene-21666.144630	1	1	0
Biological process	GO:0009933	meristem structural organization	1/140	491/156071	0.356821	0.359626	0.289482	unigene-21666.151362	1	1	0
Biological process	GO:0009084	glutamine family amino acid biosynthetic process	1/140	492/156071	0.357399	0.359626	0.289482	unigene-21666.164649	1	1	0
Biological process	GO:0009756	carbohydrate mediated signaling	1/140	496/156071	0.359709	0.359709	0.289549	unigene-21666.144630	1	1	0
Biological process	GO:0010182	sugar mediated signaling pathway	1/140	496/156071	0.359709	0.359709	0.289549	unigene-21666.144630	1	1	0
