# Supplementary material for: RNA-seq and phytohormone analysis reveals the culm color variation of Bambusa oldhamii Munro
Source: PeerJ. 2022 Jan 13;10:e12796. doi: 10.7717/peerj.12796 (PMC8761368; doi:10.7717/peerj.12796)
Supplement: Supplemental Information 16 [file peerj-10-12796-s016.xls]

## Sheet: Sheet1
phytohormones	HLZ_1	HLZ_2	HLZ_3	LZ_1	LZ_2	LZ_3
ABA（ng/g）	6.08542	4.56422	3.28339	2.85186	2.41158	2.18513
IAA（ng/g）	2.96602	3.84808	3.74701	4.13242	4.00645	4.10004
JA（ng/g）	7.27232	5.87962	17.6608	19.5332	14.6834	17.8655
GA1（ng/g）	5.55652	8.78625	11.7533	14.2025	19.8069	18.2073
GA3（ng/g）	0.637363	0.961228	1.12355	1.33442	1.71271	0.976086
GA4（ng/g）	1.25935	1.00604	0.640676	0.717206	1.05938	1.03465
GA7（ng/g）	1.7644	1.42677	1.69331	2.74392	2.26322	2.78119
