# Supplementary material for: RNA-seq and phytohormone analysis reveals the culm color variation of Bambusa oldhamii Munro
Source: PeerJ. 2022 Jan 13;10:e12796. doi: 10.7717/peerj.12796 (PMC8761368; doi:10.7717/peerj.12796)
Supplement: Supplemental Information 17 [file peerj-10-12796-s017.xls]

## Sheet: ABAcontents_geneExp_out
ID	HLZ_1	HLZ_2	HLZ_3	LZ_1	LZ_2	LZ_3	estimate	p.value
unigene-21666.148288	1.38	1.87	2.75	5.63	5.15	6.67	-0.931816	0.00681515
unigene-21666.213419	2.65	2.29	1.09	0	0	0	0.920217	0.00929397
unigene-21666.189691	7.34	7.34	3.01	1.59	0.82	1.27	0.925735	0.0080682
unigene-21666.231610	2.74	2.57	1.66	0.85	0.9	0.89	0.926565	0.00789107
unigene-21666.116124	0.89	0.57	0.47	0	0	0	0.92662	0.00787946
unigene-21666.148270	4.13	2.1	1.51	0	0.14	0.23	0.928245	0.00753837
unigene-21666.94583	3.81	3.44	1.09	0	0	0	0.932797	0.00662258
unigene-39477.3	1.1	0.72	0.54	0	0	0	0.932841	0.0066141
unigene-21666.201747	1.88	0.88	0.81	0	0	0	0.936524	0.00591584
unigene-21666.85727	2.43	1.65	0.97	0	0	0	0.937805	0.00568209
unigene-21666.170342	6.93	5.55	4.08	2.06	2.19	1.65	0.939798	0.0053273
unigene-21666.11606	0.95	0.55	0.45	0	0	0	0.940326	0.0052352
unigene-21666.245986	2.33	2.05	0.76	0.09	0	0	0.944418	0.00454817
unigene-21666.68687	0.8	0.64	0.27	0	0	0	0.957119	0.00271875
unigene-82473.0	3.15	2.52	0.55	0	0	0	0.957399	0.00268365
unigene-95563.0	0.98	0.66	0.28	0	0	0.02	0.971769	0.00118426
unigene-21666.230991	0.94	0.48	0.26	0	0	0	0.982127	0.000476317
unigene-21666.12933	1.54	0.78	0.22	0	0	0	0.988996	0.000180975
