# Supplementary material for: RNA-seq and phytohormone analysis reveals the culm color variation of Bambusa oldhamii Munro
Source: PeerJ. 2022 Jan 13;10:e12796. doi: 10.7717/peerj.12796 (PMC8761368; doi:10.7717/peerj.12796)
Supplement: Supplemental Information 18 [file peerj-10-12796-s018.xls]

## Sheet: GA1contents_geneExp_out
ID	HLZ_1	HLZ_2	HLZ_3	LZ_1	LZ_2	LZ_3	estimate	p.value
unigene-21666.68133	12.99	10.35	8.83	3.04	1.76	2.37	-0.960728	0.00228312
unigene-21666.98177	7.91	6.94	5.66	3.22	2.64	3.5	-0.952544	0.00332473
unigene-21666.73775	8.6	6.5	6.11	1.74	1.14	0.85	-0.949203	0.00380496
unigene-105707.1	1.12	0.98	0.7	0.07	0	0	-0.94777	0.00402075
unigene-21666.90795	2358.46	1152.13	708.81	474.1	30.51	71.93	-0.940323	0.00523576
unigene-39477.3	1.1	0.72	0.54	0	0	0	-0.940291	0.00524125
unigene-21666.85727	2.43	1.65	0.97	0	0	0	-0.939849	0.00531831
unigene-21666.170342	6.93	5.55	4.08	2.06	2.19	1.65	-0.938506	0.00555593
unigene-21666.116124	0.89	0.57	0.47	0	0	0	-0.937714	0.00569853
unigene-21666.11606	0.95	0.55	0.45	0	0	0	-0.934166	0.00635848
unigene-21666.213419	2.65	2.29	1.09	0	0	0	-0.933336	0.00651792
unigene-21666.68687	0.8	0.64	0.27	0	0	0	-0.931047	0.00696783
unigene-21666.245986	2.33	2.05	0.76	0.09	0	0	-0.931046	0.00696808
unigene-21666.136527	6.48	6.8	3.77	2.4	1.78	2.13	-0.927907	0.00760872
unigene-95563.0	0.98	0.66	0.28	0	0	0.02	-0.925356	0.00814965
unigene-21666.189691	7.34	7.34	3.01	1.59	0.82	1.27	-0.924794	0.00827115
unigene-50694.0	0.64	0.61	0.42	0	0	0	-0.924776	0.00827509
unigene-83385.0	0.55	0.51	0.42	0.02	0	0	-0.923762	0.00849686
unigene-21666.231610	2.74	2.57	1.66	0.85	0.9	0.89	-0.922969	0.00867214
unigene-21666.89351	8.75	4.37	3.49	0	0	0	-0.922596	0.00875528
unigene-21666.231685	4.55	3.77	3.49	0.14	0	0.22	-0.921267	0.0090543
unigene-88322.0	4.13	3.29	2.44	0	0.33	0	-0.92057	0.00921312
unigene-21666.70889	7.53	4.96	6.49	2.34	1.1	1.07	-0.918268	0.00974731
unigene-59912.0	0	0	0	0.48	1.61	1.45	0.917846	0.00984673
unigene-55057.0	0	0	0	0.55	0.76	0.76	0.91832	0.009735
unigene-21666.124946	0	0	0.13	1.74	2.41	1.79	0.919059	0.00956202
unigene-82092.1	0	0	0	0.58	1.12	1.23	0.921385	0.00902757
unigene-65416.0	0	0	0	0.84	1.26	1.3	0.922521	0.00877197
unigene-55959.0	0	0	0	0.6	1.13	1.23	0.922526	0.00877074
unigene-21666.135213	0	0	0	0.88	1.29	1.21	0.923346	0.0085886
unigene-21666.81677	0	0.01	0.02	0.6	1.92	1.55	0.924054	0.00843257
unigene-21666.2309	10.21	5.63	13.47	26.58	35.86	38.02	0.93116	0.00694521
unigene-21666.177286	0	0	0	0.82	1.94	1.62	0.931929	0.00679278
unigene-21666.79484	3.56	4.27	4.96	9.74	11.55	12.1	0.948104	0.00396989
unigene-21666.167590	0.28	0.5	0.52	1.5	2.26	1.88	0.956749	0.0027655
