# Supplementary material for: RNA-seq and phytohormone analysis reveals the culm color variation of Bambusa oldhamii Munro
Source: PeerJ. 2022 Jan 13;10:e12796. doi: 10.7717/peerj.12796 (PMC8761368; doi:10.7717/peerj.12796)
Supplement: Supplemental Information 19 [file peerj-10-12796-s019.xls]

## Sheet: GA7contents_geneExp_out
ID	HLZ_1	HLZ_2	HLZ_3	LZ_1	LZ_2	LZ_3	estimate	p.value
unigene-21666.100803	17.58	26.33	18.96	6.75	11.33	6.22	-0.977592	0.000747533
unigene-21666.199574	15.08	20.22	18.82	3.01	4.84	4	-0.956813	0.00275742
unigene-21666.64902	3.81	4.24	3.78	0.4	0.72	0.51	-0.954812	0.0030168
unigene-21666.75386	6.18	9.34	8.34	3.33	4.12	2.97	-0.954351	0.00307821
unigene-21666.50263	3.87	4.82	4.8	0.47	1.08	0.97	-0.950268	0.0036484
unigene-21666.144592	1.69	2.74	2.18	0.22	0.16	0	-0.946583	0.00420382
unigene-11517.0	0.52	0.78	0.59	0	0	0	-0.946493	0.00421793
unigene-21666.9593	0.79	1.02	0.85	0	0	0	-0.945971	0.00429991
unigene-21666.229251	0.76	0.94	0.72	0	0	0	-0.944315	0.00456496
unigene-21666.145919	1.54	2.46	1.85	0.01	0	0	-0.944223	0.00457992
unigene-21666.51712	1.4	2.71	1.63	0.34	0.57	0.17	-0.943021	0.00477735
unigene-21666.206949	7.94	10.17	7.76	3.16	2.99	2.9	-0.942153	0.0049227
unigene-21666.126192	1.76	2.53	1.89	0.02	0	0.07	-0.941777	0.00498614
unigene-57499.0	1.27	2.4	1.53	0	0.08	0	-0.94145	0.00504185
unigene-21666.35697	0.96	1.21	1.04	0.04	0	0	-0.941162	0.00509101
unigene-21666.52	0.39	0.6	0.38	0	0	0	-0.940837	0.00514677
unigene-34183.0	1.09	1.69	1.33	0.07	0	0	-0.939837	0.00532053
unigene-21666.82142	1.58	2.73	1.81	0	0	0	-0.9396	0.0053621
unigene-42832.0	1.44	1.7	1.37	0.07	0	0	-0.937955	0.00565489
unigene-54902.0	0.31	0.57	0.44	0	0	0	-0.936777	0.00586932
unigene-21666.154176	1.81	2.39	2.22	0.74	0.68	0.67	-0.936702	0.00588311
unigene-21666.71578	11.34	17.11	15.84	0.2	0	0.36	-0.933833	0.00642218
unigene-21666.198767	41.49	42.02	39.14	20.66	19.5	17.68	-0.933821	0.00642449
unigene-21666.194406	2.51	2.62	2.15	0	0	0	-0.932783	0.00662536
unigene-61591.0	1.35	2.57	1.55	0.14	0.31	0.24	-0.932748	0.0066321
unigene-21666.195887	0.76	0.8	0.78	0	0	0	-0.932435	0.00669332
unigene-21666.143290	0.83	1.03	1.08	0	0	0	-0.931521	0.00687347
unigene-21666.134539	2.37	2.42	2.28	0	0	0	-0.931085	0.00696027
unigene-21666.116766	1.19	2.01	1.12	0	0	0	-0.930448	0.00708792
unigene-21666.211778	0.81	1.62	1.02	0	0	0	-0.929253	0.00733075
unigene-21666.26519	0.58	0.63	0.68	0	0	0	-0.9271	0.00777791
unigene-21666.170798	0.3	0.64	0.4	0	0	0	-0.924194	0.00840199
unigene-21666.80568	4.64	5.67	4.07	2.08	1.95	2.01	-0.924047	0.00843411
unigene-21666.45647	0.95	0.91	0.79	0	0	0	-0.923618	0.00852859
unigene-21666.147127	49.16	48.76	52.76	19.24	17.2	12.58	-0.923471	0.00856094
unigene-74133.0	1.25	1.46	0.86	0	0	0	-0.923448	0.00856593
unigene-21666.107450	2.03	2.12	1.71	0.15	0.01	0.03	-0.923124	0.00863778
unigene-114620.2	2.19	2.85	3.17	0	0	0	-0.922968	0.00867245
unigene-21666.94074	0.63	1.03	1.06	0	0	0	-0.921602	0.00897847
unigene-37713.0	0.62	1.23	1.11	0	0	0	-0.92139	0.00902652
unigene-21666.122250	18.97	24.63	19.16	10.84	8.67	8.25	-0.920898	0.00913832
unigene-21666.50555	1.76	1.82	2.06	0	0	0	-0.920616	0.00920251
unigene-21666.149535	1.25	1.27	0.98	0	0	0.06	-0.920205	0.00929689
unigene-21666.147134	0.88	0.82	0.69	0	0	0	-0.918562	0.00967824
unigene-74139.0	15.04	20.82	17.05	3.61	0.58	1.24	-0.918427	0.00970979
unigene-21666.87695	16.05	17.26	14.28	6.28	5.44	6.16	-0.918221	0.0097583
unigene-21666.86045	0.96	1.35	0.81	0.14	0.02	0.05	-0.917383	0.00995632
unigene-38286.0	0	0.27	0.04	1.71	1.76	2.22	0.91851	0.00969046
unigene-21666.135267	4.87	4.57	7.06	14.69	11.07	11.13	0.918894	0.00960062
unigene-21666.226134	0	0	0.04	2.68	0.91	4.24	0.920065	0.00932909
unigene-21666.13708	0	0	0	1.49	1.46	1.39	0.922826	0.00870392
unigene-21666.106938	0.23	0.08	0	2.65	0.59	3.42	0.923333	0.0085915
unigene-43499.0	0	0	0	0.74	0.68	1.37	0.923359	0.00858575
unigene-21666.214216	0	0	0	1.6	1.26	2.95	0.924925	0.00824277
unigene-21666.118072	0	0	0	0.8	0.65	0.61	0.927898	0.00761069
unigene-21666.152817	0.24	0.19	0.28	0.79	0.88	1.05	0.93041	0.00709574
unigene-21666.969	0	0	0	0.92	0.39	1.46	0.930561	0.00706518
unigene-21666.163345	3.05	1.58	3.81	10.62	11.93	12.97	0.931326	0.00691215
unigene-21666.51130	0	0	0.02	0.98	1.06	1.23	0.931334	0.00691068
unigene-21666.6549	0	0.22	0	5.99	1.32	5.86	0.935143	0.00617325
unigene-21666.148288	1.38	1.87	2.75	5.63	5.15	6.67	0.939591	0.00536356
unigene-2150.0	0.03	0	0.02	1.42	0.9	0.96	0.939638	0.0053554
unigene-21666.117220	0	0	0	0.48	0.2	0.71	0.941073	0.00510628
unigene-21666.27755	0	0.05	0	0.83	0.76	1.21	0.942863	0.00480362
unigene-21666.194916	0	0	0	1.1	0.25	1.12	0.944028	0.00461166
unigene-21666.201092	0	0	0	0.58	0.26	0.39	0.945882	0.00431388
unigene-21666.151555	3.58	3.5	5.82	9.59	8.18	9.5	0.946253	0.00425544
unigene-21666.8756	1.72	1.94	1.34	4.91	3.95	4.63	0.946619	0.00419832
unigene-21666.245522	3.07	2.04	3.8	7.94	6.79	6.87	0.951384	0.00348775
unigene-21666.149875	0	0	0	2.52	1.35	1.77	0.951404	0.00348502
unigene-21666.94332	9.09	9.94	12.34	21.66	18.92	26.25	0.952789	0.00329072
unigene-21666.135570	0	0	0	2.47	1.91	2.16	0.954738	0.00302655
unigene-21666.172802	0.45	0.23	0.63	2.13	1.89	1.96	0.955283	0.00295469
unigene-68888.0	0	0	0	1.34	0.46	1.1	0.959387	0.00244059
unigene-21666.137622	0.32	0.37	0.02	3.04	2.41	3.8	0.959776	0.0023944
unigene-115886.1	0	0	0	0.69	0.25	0.81	0.961092	0.00224135
unigene-52677.0	0	0	0	0.44	0.18	0.34	0.961152	0.00223441
unigene-21666.135774	0	0	0	1.17	0.4	1.02	0.962702	0.00206079
unigene-21666.100556	1.42	0.73	1.15	4.41	3.23	3.47	0.962958	0.00203274
unigene-55887.2	4.7	4.83	4.74	9.52	8.57	10.92	0.963085	0.00201893
unigene-21666.93366	0	0.01	0	1.28	0.53	1.56	0.963261	0.00199988
unigene-48118.0	0	0	0	0.91	0.56	1.2	0.9697	0.00136319
unigene-8395.0	0	0	0	1.87	1.4	2.06	0.973158	0.00107111
unigene-21666.41135	0	0	0	0.66	0.48	0.73	0.974967	0.000932141
unigene-66151.0	0.02	0	0	3.38	2.18	3.17	0.976281	0.000837191
unigene-21666.96545	0.5	0.42	0.35	2.15	1.65	2.27	0.976976	0.000789081
unigene-21666.112172	0	0	0	1.5	1.01	1.76	0.977069	0.00078272
unigene-21666.241021	0.09	0.01	0	1.43	0.95	1.32	0.977828	0.000731979
unigene-21666.173757	2.02	2.1	2.6	7.16	5.35	7.12	0.978817	0.000668348
unigene-21666.9034	0.02	0	0	0.88	0.57	1.01	0.980492	0.00056714
unigene-21666.239597	0.08	0.02	0.04	1.05	0.72	1.06	0.983047	0.000428675
