# Supplementary material for: RNA-seq and phytohormone analysis reveals the culm color variation of Bambusa oldhamii Munro
Source: PeerJ. 2022 Jan 13;10:e12796. doi: 10.7717/peerj.12796 (PMC8761368; doi:10.7717/peerj.12796)
Supplement: Supplemental Information 20 [file peerj-10-12796-s020.xlsx]

## Sheet: Sheet 1
Ontology	ID	Description	GeneRatio	BgRatio	pvalue	p.adjust	qvalue	geneID	Count	up	down
Cellular component	GO:0034707	chloride channel complex	2/88	135/167039	0.00237137	0.0272021	0.0165774	unigene-21666.135570/unigene-48118.0	2	2	0
Cellular component	GO:0034702	ion channel complex	2/88	136/167039	0.00240594	0.0272021	0.0165774	unigene-21666.135570/unigene-48118.0	2	2	0
Cellular component	GO:0034045	phagophore assembly site membrane	2/88	137/167039	0.00244075	0.0272021	0.0165774	unigene-21666.82142/unigene-39477.3	2	2	0
Cellular component	GO:1902495	transmembrane transporter complex	2/88	152/167039	0.0029913	0.0272021	0.0165774	unigene-21666.135570/unigene-48118.0	2	2	0
Cellular component	GO:0000178	exosome (RNase complex)	2/88	183/167039	0.00429506	0.0272021	0.0165774	unigene-21666.230991/unigene-55057.0	2	2	0
Cellular component	GO:1905354	exoribonuclease complex	2/88	183/167039	0.00429506	0.0272021	0.0165774	unigene-21666.230991/unigene-55057.0	2	2	0
Cellular component	GO:1990351	transporter complex	2/88	236/167039	0.00702407	0.0375808	0.0229024	unigene-21666.135570/unigene-48118.0	2	2	0
Cellular component	GO:0010009	cytoplasmic side of endosome membrane	1/88	16/167039	0.00839632	0.0375808	0.0229024	unigene-55887.2	1	1	0
Cellular component	GO:0000407	phagophore assembly site	2/88	267/167039	0.00890071	0.0375808	0.0229024	unigene-21666.82142/unigene-39477.3	2	2	0
Cellular component	GO:1902554	serine/threonine protein kinase complex	2/88	303/167039	0.0113285	0.0423835	0.0258293	unigene-21666.229251/unigene-21666.89351	2	2	0
Cellular component	GO:1902911	protein kinase complex	2/88	316/167039	0.0122689	0.0423835	0.0258293	unigene-21666.229251/unigene-21666.89351	2	2	0
Cellular component	GO:0009360	DNA polymerase III complex	1/88	27/167039	0.0141283	0.0447397	0.0272652	unigene-21666.9034	1	1	0
Cellular component	GO:0048476	Holliday junction resolvase complex	1/88	40/167039	0.0208603	0.0609762	0.03716	unigene-21666.45647	1	1	0
Cellular component	GO:0005675	transcription factor TFIIH holo complex	1/88	92/167039	0.0473367	0.118382	0.0721439	unigene-21666.229251	1	1	0
Cellular component	GO:0032806	carboxy-terminal domain protein kinase complex	1/88	92/167039	0.0473367	0.118382	0.0721439	unigene-21666.229251	1	1	0
Cellular component	GO:0042575	DNA polymerase complex	1/88	97/167039	0.0498449	0.118382	0.0721439	unigene-21666.9034	1	1	0
Cellular component	GO:0005663	DNA replication factor C complex	1/88	108/167039	0.0553399	0.123701	0.0753857	unigene-21666.9034	1	1	0
Cellular component	GO:0042644	chloroplast nucleoid	1/88	130/167039	0.066236	0.132172	0.0805482	unigene-21666.135267	1	1	0
Cellular component	GO:0016602	CCAAT-binding factor complex	1/88	135/167039	0.068695	0.132172	0.0805482	unigene-21666.71578	1	1	0
Cellular component	GO:0000307	cyclin-dependent protein kinase holoenzyme complex	1/88	145/167039	0.0735938	0.132172	0.0805482	unigene-21666.89351	1	1	0
Cellular component	GO:0016442	RISC complex	1/88	151/167039	0.0765208	0.132172	0.0805482	unigene-50694.0	1	1	0
Cellular component	GO:0031332	RNAi effector complex	1/88	151/167039	0.0765208	0.132172	0.0805482	unigene-50694.0	1	1	0
Cellular component	GO:0000322	storage vacuole	1/88	178/167039	0.0895797	0.141835	0.0864366	unigene-114620.2	1	1	0
Cellular component	GO:0000326	protein storage vacuole	1/88	178/167039	0.0895797	0.141835	0.0864366	unigene-114620.2	1	1	0
Cellular component	GO:0042646	plastid nucleoid	1/88	224/167039	0.111409	0.169342	0.1032	unigene-21666.135267	1	1	0
Cellular component	GO:0005657	replication fork	1/88	250/167039	0.123518	0.180526	0.110016	unigene-21666.9034	1	1	0
Cellular component	GO:0031901	early endosome membrane	1/88	261/167039	0.128591	0.18098	0.110293	unigene-55887.2	1	1	0
Cellular component	GO:0009295	nucleoid	1/88	283/167039	0.138652	0.184964	0.11272	unigene-21666.135267	1	1	0
Cellular component	GO:0005776	autophagosome	1/88	292/167039	0.142734	0.184964	0.11272	unigene-21666.214216	1	1	0
Cellular component	GO:0005871	kinesin complex	1/88	307/167039	0.149496	0.184964	0.11272	unigene-21666.52	1	1	0
Cellular component	GO:0005758	mitochondrial intermembrane space	1/88	314/167039	0.152633	0.184964	0.11272	unigene-21666.241021	1	1	0
Cellular component	GO:0031970	organelle envelope lumen	1/88	321/167039	0.155759	0.184964	0.11272	unigene-21666.241021	1	1	0
Cellular component	GO:0030665	clathrin-coated vesicle membrane	1/88	373/167039	0.178625	0.20569	0.125351	unigene-21666.107450	1	1	0
Cellular component	GO:0098562	cytoplasmic side of membrane	1/88	390/167039	0.185967	0.207846	0.126665	unigene-55887.2	1	1	0
Cellular component	GO:0005747	mitochondrial respiratory chain complex I	1/88	445/167039	0.209279	0.21303	0.129825	unigene-21666.241021	1	1	0
Cellular component	GO:0030964	NADH dehydrogenase complex	1/88	445/167039	0.209279	0.21303	0.129825	unigene-21666.241021	1	1	0
Cellular component	GO:0045271	respiratory chain complex I	1/88	445/167039	0.209279	0.21303	0.129825	unigene-21666.241021	1	1	0
Cellular component	GO:0098552	side of membrane	1/88	454/167039	0.21303	0.21303	0.129825	unigene-55887.2	1	1	0
Molecular function	GO:0080025	phosphatidylinositol-3,5-bisphosphate binding	2/85	61/180523	0.000393767	0.0365916	0.0208203	unigene-21666.82142/unigene-39477.3	2	2	0
Molecular function	GO:0032266	phosphatidylinositol-3-phosphate binding	2/85	79/180523	0.000659309	0.0365916	0.0208203	unigene-21666.82142/unigene-39477.3	2	2	0
Molecular function	GO:1902936	phosphatidylinositol bisphosphate binding	2/85	133/180523	0.00184769	0.0626102	0.0356246	unigene-21666.82142/unigene-39477.3	2	2	0
Molecular function	GO:0005254	chloride channel activity	2/85	151/180523	0.00237075	0.0626102	0.0356246	unigene-21666.135570/unigene-48118.0	2	2	0
Molecular function	GO:0015108	chloride transmembrane transporter activity	2/85	165/180523	0.00282028	0.0626102	0.0356246	unigene-21666.135570/unigene-48118.0	2	2	0
Molecular function	GO:1901981	phosphatidylinositol phosphate binding	2/85	205/180523	0.00430582	0.0796577	0.0453244	unigene-21666.82142/unigene-39477.3	2	2	0
Molecular function	GO:0052873	FMN reductase (NADPH) activity	1/85	12/180523	0.00563581	0.0893679	0.0508494	unigene-88322.0	1	1	0
Molecular function	GO:0030332	cyclin binding	1/85	16/180523	0.00750743	0.0989823	0.0563199	unigene-21666.89351	1	1	0
Molecular function	GO:0005253	anion channel activity	2/85	284/180523	0.00807879	0.0989823	0.0563199	unigene-21666.135570/unigene-48118.0	2	2	0
Molecular function	GO:0004475	mannose-1-phosphate guanylyltransferase activity	1/85	22/180523	0.0103083	0.0989823	0.0563199	unigene-21666.116766	1	1	0
Molecular function	GO:0061575	cyclin-dependent protein serine/threonine kinase activator activity	1/85	23/180523	0.0107744	0.0989823	0.0563199	unigene-21666.229251	1	1	0
Molecular function	GO:0008429	phosphatidylethanolamine binding	1/85	26/180523	0.0121713	0.0989823	0.0563199	unigene-54902.0	1	1	0
Molecular function	GO:0048257	3'-flap endonuclease activity	1/85	30/180523	0.0140307	0.0989823	0.0563199	unigene-21666.45647	1	1	0
Molecular function	GO:0016174	NAD(P)H oxidase activity	1/85	32/180523	0.0149592	0.0989823	0.0563199	unigene-21666.75386	1	1	0
Molecular function	GO:0004693	cyclin-dependent protein serine/threonine kinase activity	2/85	414/180523	0.0165231	0.0989823	0.0563199	unigene-115886.1/unigene-21666.89351	2	2	0
Molecular function	GO:0097472	cyclin-dependent protein kinase activity	2/85	414/180523	0.0165231	0.0989823	0.0563199	unigene-115886.1/unigene-21666.89351	2	2	0
Molecular function	GO:0008905	mannose-phosphate guanylyltransferase activity	1/85	38/180523	0.0177393	0.0989823	0.0563199	unigene-21666.116766	1	1	0
Molecular function	GO:0004821	histidine-tRNA ligase activity	1/85	40/180523	0.0186643	0.0989823	0.0563199	unigene-21666.100556	1	1	0
Molecular function	GO:0070182	DNA polymerase binding	1/85	41/180523	0.0191264	0.0989823	0.0563199	unigene-115886.1	1	1	0
Molecular function	GO:0009940	amino-terminal vacuolar sorting propeptide binding	1/85	45/180523	0.020973	0.0989823	0.0563199	unigene-21666.107450	1	1	0
Molecular function	GO:0016655	oxidoreductase activity, acting on NAD(P)H, quinone or similar compound as acceptor	2/85	471/180523	0.0210275	0.0989823	0.0563199	unigene-21666.241021/unigene-88322.0	2	2	0
Molecular function	GO:0045548	phenylalanine ammonia-lyase activity	1/85	58/180523	0.0269505	0.0989823	0.0563199	unigene-21666.90795	1	1	0
Molecular function	GO:0010209	vacuolar sorting signal binding	1/85	63/180523	0.0292399	0.0989823	0.0563199	unigene-21666.107450	1	1	0
Molecular function	GO:0051996	squalene synthase activity	1/85	66/180523	0.030611	0.0989823	0.0563199	unigene-21666.93366	1	1	0
Molecular function	GO:0004310	farnesyl-diphosphate farnesyltransferase activity	1/85	67/180523	0.0310676	0.0989823	0.0563199	unigene-21666.93366	1	1	0
Molecular function	GO:0070401	NADP+ binding	1/85	71/180523	0.0328919	0.0989823	0.0563199	unigene-21666.87695	1	1	0
Molecular function	GO:0102077	oleamide hydrolase activity	1/85	72/180523	0.0333474	0.0989823	0.0563199	unigene-21666.148288	1	1	0
Molecular function	GO:0103073	anandamide amidohydrolase activity	1/85	72/180523	0.0333474	0.0989823	0.0563199	unigene-21666.148288	1	1	0
Molecular function	GO:0008106	alcohol dehydrogenase (NADP+) activity	1/85	75/180523	0.0347128	0.0989823	0.0563199	unigene-21666.87695	1	1	0
Molecular function	GO:0015651	quaternary ammonium group transmembrane transporter activity	1/85	77/180523	0.035622	0.0989823	0.0563199	unigene-21666.201092	1	1	0
Molecular function	GO:0090416	nicotinate transmembrane transporter activity	1/85	77/180523	0.035622	0.0989823	0.0563199	unigene-21666.201092	1	1	0
Molecular function	GO:0090417	N-methylnicotinate transmembrane transporter activity	1/85	77/180523	0.035622	0.0989823	0.0563199	unigene-21666.201092	1	1	0
Molecular function	GO:0016841	ammonia-lyase activity	1/85	78/180523	0.0360763	0.0989823	0.0563199	unigene-21666.90795	1	1	0
Molecular function	GO:0047412	N-(long-chain-acyl)ethanolamine deacylase activity	1/85	78/180523	0.0360763	0.0989823	0.0563199	unigene-21666.148288	1	1	0
Molecular function	GO:0061665	SUMO ligase activity	1/85	78/180523	0.0360763	0.0989823	0.0563199	unigene-21666.172802	1	1	0
Molecular function	GO:0004311	farnesyltranstransferase activity	1/85	80/180523	0.0369842	0.0989823	0.0563199	unigene-21666.93366	1	1	0
Molecular function	GO:0015146	pentose transmembrane transporter activity	1/85	82/180523	0.0378913	0.0989823	0.0563199	unigene-21666.226134	1	1	0
Molecular function	GO:0015148	D-xylose transmembrane transporter activity	1/85	82/180523	0.0378913	0.0989823	0.0563199	unigene-21666.226134	1	1	0
Molecular function	GO:0015334	high-affinity oligopeptide transmembrane transporter activity	1/85	82/180523	0.0378913	0.0989823	0.0563199	unigene-21666.9593	1	1	0
Molecular function	GO:0015575	mannitol transmembrane transporter activity	1/85	82/180523	0.0378913	0.0989823	0.0563199	unigene-21666.226134	1	1	0
Molecular function	GO:0015576	sorbitol transmembrane transporter activity	1/85	82/180523	0.0378913	0.0989823	0.0563199	unigene-21666.226134	1	1	0
Molecular function	GO:0015591	D-ribose transmembrane transporter activity	1/85	82/180523	0.0378913	0.0989823	0.0563199	unigene-21666.226134	1	1	0
Molecular function	GO:0015168	glycerol transmembrane transporter activity	1/85	83/180523	0.0383445	0.0989823	0.0563199	unigene-21666.226134	1	1	0
Molecular function	GO:0003955	NAD(P)H dehydrogenase (quinone) activity	1/85	90/180523	0.0415111	0.100165	0.0569931	unigene-88322.0	1	1	0
Molecular function	GO:0004144	diacylglycerol O-acyltransferase activity	1/85	92/180523	0.042414	0.100165	0.0569931	unigene-2150.0	1	1	0
Molecular function	GO:0048256	flap endonuclease activity	1/85	93/180523	0.0428651	0.100165	0.0569931	unigene-21666.45647	1	1	0
Molecular function	GO:0005354	galactose transmembrane transporter activity	1/85	95/180523	0.0437667	0.100165	0.0569931	unigene-21666.226134	1	1	0
Molecular function	GO:0019209	kinase activator activity	1/85	96/180523	0.0442172	0.100165	0.0569931	unigene-21666.229251	1	1	0
Molecular function	GO:0030295	protein kinase activator activity	1/85	96/180523	0.0442172	0.100165	0.0569931	unigene-21666.229251	1	1	0
Molecular function	GO:0102229	amylopectin maltohydrolase activity	1/85	101/180523	0.0464664	0.103155	0.0586944	unigene-21666.100803	1	1	0
Molecular function	GO:0004826	phenylalanine-tRNA ligase activity	1/85	108/180523	0.0496066	0.105768	0.0601811	unigene-21666.86045	1	1	0
Molecular function	GO:0004033	aldo-keto reductase (NADP) activity	1/85	109/180523	0.0500544	0.105768	0.0601811	unigene-21666.87695	1	1	0
Molecular function	GO:0016161	beta-amylase activity	1/85	110/180523	0.0505019	0.105768	0.0601811	unigene-21666.100803	1	1	0
Molecular function	GO:0070006	metalloaminopeptidase activity	1/85	114/180523	0.0522901	0.107485	0.061158	unigene-21666.124946	1	1	0
Molecular function	GO:0050664	oxidoreductase activity, acting on NAD(P)H, oxygen as acceptor	1/85	121/180523	0.0554113	0.11183	0.0636302	unigene-21666.75386	1	1	0
Molecular function	GO:0008802	betaine-aldehyde dehydrogenase activity	1/85	126/180523	0.0576346	0.11349	0.0645747	unigene-37713.0	1	1	0
Molecular function	GO:0005365	myo-inositol transmembrane transporter activity	1/85	130/180523	0.0594094	0.11349	0.0645747	unigene-21666.226134	1	1	0
Molecular function	GO:0005247	voltage-gated chloride channel activity	1/85	136/180523	0.0620655	0.11349	0.0645747	unigene-48118.0	1	1	0
Molecular function	GO:0019789	SUMO transferase activity	1/85	136/180523	0.0620655	0.11349	0.0645747	unigene-21666.172802	1	1	0
Molecular function	GO:0070568	guanylyltransferase activity	1/85	137/180523	0.0625075	0.11349	0.0645747	unigene-21666.116766	1	1	0
Molecular function	GO:0015166	polyol transmembrane transporter activity	1/85	138/180523	0.0629493	0.11349	0.0645747	unigene-21666.226134	1	1	0
Molecular function	GO:0042937	tripeptide transmembrane transporter activity	1/85	139/180523	0.0633908	0.11349	0.0645747	unigene-21666.9593	1	1	0
Molecular function	GO:0016646	oxidoreductase activity, acting on the CH-NH group of donors, NAD or NADP as acceptor	1/85	142/180523	0.0647142	0.11402	0.0648764	unigene-88322.0	1	1	0
Molecular function	GO:0090482	vitamin transmembrane transporter activity	1/85	147/180523	0.0669158	0.116057	0.0660354	unigene-21666.201092	1	1	0
Molecular function	GO:0008519	ammonium transmembrane transporter activity	1/85	156/180523	0.0708658	0.119183	0.0678142	unigene-21666.201092	1	1	0
Molecular function	GO:0016160	amylase activity	1/85	156/180523	0.0708658	0.119183	0.0678142	unigene-21666.100803	1	1	0
Molecular function	GO:0016229	steroid dehydrogenase activity	1/85	166/180523	0.0752353	0.121025	0.068862	unigene-21666.87695	1	1	0
Molecular function	GO:0000285	1-phosphatidylinositol-3-phosphate 5-kinase activity	1/85	170/180523	0.0769774	0.121025	0.068862	unigene-21666.11606	1	1	0
Molecular function	GO:0004525	ribonuclease III activity	1/85	171/180523	0.0774124	0.121025	0.068862	unigene-50694.0	1	1	0
Molecular function	GO:0032296	double-stranded RNA-specific ribonuclease activity	1/85	171/180523	0.0774124	0.121025	0.068862	unigene-50694.0	1	1	0
Molecular function	GO:1901618	organic hydroxy compound transmembrane transporter activity	1/85	171/180523	0.0774124	0.121025	0.068862	unigene-21666.226134	1	1	0
Molecular function	GO:0015101	organic cation transmembrane transporter activity	1/85	181/180523	0.0817515	0.126034	0.0717118	unigene-21666.201092	1	1	0
Molecular function	GO:0016538	cyclin-dependent protein serine/threonine kinase regulator activity	1/85	186/180523	0.0839134	0.127594	0.0725999	unigene-21666.229251	1	1	0
Molecular function	GO:0016889	endodeoxyribonuclease activity, producing 3'-phosphomonoesters	1/85	190/180523	0.0856394	0.128022	0.0728431	unigene-21666.45647	1	1	0
Molecular function	GO:0035673	oligopeptide transmembrane transporter activity	1/85	192/180523	0.0865012	0.128022	0.0728431	unigene-21666.9593	1	1	0
Molecular function	GO:0003887	DNA-directed DNA polymerase activity	1/85	202/180523	0.090798	0.132613	0.0754554	unigene-21666.9034	1	1	0
Molecular function	GO:0016894	endonuclease activity, active with either ribo- or deoxyribonucleic acids and producing 3'-phosphomonoesters	1/85	209/180523	0.0937938	0.135209	0.0769327	unigene-21666.45647	1	1	0
Molecular function	GO:0004040	amidase activity	1/85	231/180523	0.103146	0.146158	0.0831626	unigene-21666.148288	1	1	0
Molecular function	GO:0016840	carbon-nitrogen lyase activity	1/85	235/180523	0.104836	0.146158	0.0831626	unigene-21666.90795	1	1	0
Molecular function	GO:0000175	3'-5'-exoribonuclease activity	1/85	246/180523	0.109468	0.146158	0.0831626	unigene-21666.230991	1	1	0
Molecular function	GO:0008353	RNA polymerase II CTD heptapeptide repeat kinase activity	1/85	246/180523	0.109468	0.146158	0.0831626	unigene-21666.89351	1	1	0
Molecular function	GO:0016411	acylglycerol O-acyltransferase activity	1/85	248/180523	0.110307	0.146158	0.0831626	unigene-2150.0	1	1	0
Molecular function	GO:0004520	endodeoxyribonuclease activity	1/85	253/180523	0.112403	0.146158	0.0831626	unigene-21666.45647	1	1	0
Molecular function	GO:0008235	metalloexopeptidase activity	1/85	253/180523	0.112403	0.146158	0.0831626	unigene-21666.124946	1	1	0
Molecular function	GO:0008308	voltage-gated anion channel activity	1/85	253/180523	0.112403	0.146158	0.0831626	unigene-48118.0	1	1	0
Molecular function	GO:0004791	thioredoxin-disulfide reductase activity	1/85	255/180523	0.11324	0.146158	0.0831626	unigene-21666.106938	1	1	0
Molecular function	GO:0051087	chaperone binding	1/85	265/180523	0.117412	0.148625	0.0845659	unigene-38286.0	1	1	0
Molecular function	GO:0016645	oxidoreductase activity, acting on the CH-NH group of donors	1/85	266/180523	0.117828	0.148625	0.0845659	unigene-88322.0	1	1	0
Molecular function	GO:0008137	NADH dehydrogenase (ubiquinone) activity	1/85	277/180523	0.122394	0.150952	0.0858903	unigene-21666.241021	1	1	0
Molecular function	GO:0050136	NADH dehydrogenase (quinone) activity	1/85	277/180523	0.122394	0.150952	0.0858903	unigene-21666.241021	1	1	0
Molecular function	GO:0004659	prenyltransferase activity	1/85	310/180523	0.13595	0.165829	0.0943549	unigene-21666.93366	1	1	0
Molecular function	GO:0016307	phosphatidylinositol phosphate kinase activity	1/85	314/180523	0.137579	0.165992	0.0944476	unigene-21666.11606	1	1	0
Molecular function	GO:0004030	aldehyde dehydrogenase [NAD(P)+] activity	1/85	319/180523	0.139611	0.166632	0.094812	unigene-37713.0	1	1	0
Molecular function	GO:0031072	heat shock protein binding	1/85	329/180523	0.143661	0.167041	0.0950449	unigene-21666.147134	1	1	0
Molecular function	GO:0004536	deoxyribonuclease activity	1/85	330/180523	0.144065	0.167041	0.0950449	unigene-21666.45647	1	1	0
Molecular function	GO:1904680	peptide transmembrane transporter activity	1/85	331/180523	0.144468	0.167041	0.0950449	unigene-21666.9593	1	1	0
Molecular function	GO:0004532	exoribonuclease activity	1/85	340/180523	0.148094	0.167396	0.0952464	unigene-21666.230991	1	1	0
Molecular function	GO:0016896	exoribonuclease activity, producing 5'-phosphomonoesters	1/85	340/180523	0.148094	0.167396	0.0952464	unigene-21666.230991	1	1	0
Molecular function	GO:0003954	NADH dehydrogenase activity	1/85	343/180523	0.149299	0.167396	0.0952464	unigene-21666.241021	1	1	0
Molecular function	GO:0016668	oxidoreductase activity, acting on a sulfur group of donors, NAD(P) as acceptor	1/85	384/180523	0.1656	0.183816	0.10459	unigene-21666.106938	1	1	0
Molecular function	GO:0042887	amide transmembrane transporter activity	1/85	421/180523	0.180046	0.19464	0.110748	unigene-21666.9593	1	1	0
Molecular function	GO:0008028	monocarboxylic acid transmembrane transporter activity	1/85	423/180523	0.18082	0.19464	0.110748	unigene-21666.201092	1	1	0
Molecular function	GO:0019207	kinase regulator activity	1/85	427/180523	0.182365	0.19464	0.110748	unigene-21666.229251	1	1	0
Molecular function	GO:0019887	protein kinase regulator activity	1/85	427/180523	0.182365	0.19464	0.110748	unigene-21666.229251	1	1	0
Molecular function	GO:0004177	aminopeptidase activity	1/85	446/180523	0.189667	0.200505	0.114085	unigene-21666.124946	1	1	0
Molecular function	GO:0016796	exonuclease activity, active with either ribo- or deoxyribonucleic acids and producing 5'-phosphomonoesters	1/85	454/180523	0.192722	0.201674	0.114751	unigene-21666.230991	1	1	0
Molecular function	GO:0000049	tRNA binding	1/85	461/180523	0.195386	0.201674	0.114751	unigene-21666.86045	1	1	0
Molecular function	GO:0019901	protein kinase binding	1/85	467/180523	0.197662	0.201674	0.114751	unigene-115886.1	1	1	0
Molecular function	GO:0005048	signal sequence binding	1/85	468/180523	0.198041	0.201674	0.114751	unigene-21666.107450	1	1	0
Molecular function	GO:0009881	photoreceptor activity	1/85	476/180523	0.201064	0.202892	0.115444	unigene-21666.134539	1	1	0
Molecular function	GO:0008408	3'-5' exonuclease activity	1/85	491/180523	0.206704	0.206704	0.117612	unigene-21666.230991	1	1	0
Biological process	GO:0034497	protein localization to phagophore assembly site	2/75	108/156071	0.00127379	0.115527	0.0834563	unigene-21666.82142/unigene-39477.3	2	2	0
Biological process	GO:0000422	autophagy of mitochondrion	2/75	177/156071	0.00336105	0.115527	0.0834563	unigene-21666.82142/unigene-39477.3	2	2	0
Biological process	GO:0061726	mitochondrion disassembly	2/75	177/156071	0.00336105	0.115527	0.0834563	unigene-21666.82142/unigene-39477.3	2	2	0
Biological process	GO:0031570	DNA integrity checkpoint	2/75	181/156071	0.00351076	0.115527	0.0834563	unigene-115886.1/unigene-21666.45647	2	2	0
Biological process	GO:0044804	autophagy of nucleus	2/75	194/156071	0.00401846	0.115527	0.0834563	unigene-21666.82142/unigene-39477.3	2	2	0
Biological process	GO:0010389	regulation of G2/M transition of mitotic cell cycle	2/75	216/156071	0.00495033	0.115527	0.0834563	unigene-21666.45647/unigene-21666.89351	2	2	0
Biological process	GO:1902749	regulation of cell cycle G2/M phase transition	2/75	220/156071	0.00512945	0.115527	0.0834563	unigene-21666.45647/unigene-21666.89351	2	2	0
Biological process	GO:1903008	organelle disassembly	2/75	221/156071	0.0051747	0.115527	0.0834563	unigene-21666.82142/unigene-39477.3	2	2	0
Biological process	GO:0000086	G2/M transition of mitotic cell cycle	2/75	228/156071	0.00549654	0.115527	0.0834563	unigene-21666.45647/unigene-21666.89351	2	2	0
Biological process	GO:0044839	cell cycle G2/M phase transition	2/75	232/156071	0.00568449	0.115527	0.0834563	unigene-21666.45647/unigene-21666.89351	2	2	0
Biological process	GO:0051513	regulation of monopolar cell growth	1/75	13/156071	0.00622941	0.115527	0.0834563	unigene-11517.0	1	1	0
Biological process	GO:0051510	regulation of unidimensional cell growth	2/75	279/156071	0.00810831	0.129458	0.0935199	unigene-11517.0/unigene-21666.135213	2	2	0
Biological process	GO:0000075	cell cycle checkpoint	2/75	308/156071	0.00979675	0.129458	0.0935199	unigene-115886.1/unigene-21666.45647	2	2	0
Biological process	GO:0000045	autophagosome assembly	2/75	310/156071	0.00991848	0.129458	0.0935199	unigene-21666.82142/unigene-39477.3	2	2	0
Biological process	GO:0006497	protein lipidation	2/75	343/156071	0.0120234	0.129458	0.0935199	unigene-21666.82142/unigene-39477.3	2	2	0
Biological process	GO:0042158	lipoprotein biosynthetic process	2/75	343/156071	0.0120234	0.129458	0.0935199	unigene-21666.82142/unigene-39477.3	2	2	0
Biological process	GO:1901990	regulation of mitotic cell cycle phase transition	2/75	347/156071	0.0122907	0.129458	0.0935199	unigene-21666.45647/unigene-21666.89351	2	2	0
Biological process	GO:1901987	regulation of cell cycle phase transition	2/75	362/156071	0.0133162	0.129458	0.0935199	unigene-21666.45647/unigene-21666.89351	2	2	0
Biological process	GO:1905037	autophagosome organization	2/75	379/156071	0.0145218	0.129458	0.0935199	unigene-21666.82142/unigene-39477.3	2	2	0
Biological process	GO:0042157	lipoprotein metabolic process	2/75	385/156071	0.0149582	0.129458	0.0935199	unigene-21666.82142/unigene-39477.3	2	2	0
Biological process	GO:0031573	intra-S DNA damage checkpoint	1/75	32/156071	0.0152651	0.129458	0.0935199	unigene-21666.45647	1	1	0
Biological process	GO:0000727	double-strand break repair via break-induced replication	1/75	37/156071	0.0176294	0.129458	0.0935199	unigene-21666.45647	1	1	0
Biological process	GO:0031297	replication fork processing	1/75	37/156071	0.0176294	0.129458	0.0935199	unigene-21666.45647	1	1	0
Biological process	GO:0042814	monopolar cell growth	1/75	38/156071	0.0181016	0.129458	0.0935199	unigene-11517.0	1	1	0
Biological process	GO:0009298	GDP-mannose biosynthetic process	1/75	39/156071	0.0185736	0.129458	0.0935199	unigene-21666.116766	1	1	0
Biological process	GO:0006427	histidyl-tRNA aminoacylation	1/75	40/156071	0.0190453	0.129458	0.0935199	unigene-21666.100556	1	1	0
Biological process	GO:0044772	mitotic cell cycle phase transition	2/75	443/156071	0.0194613	0.129458	0.0935199	unigene-21666.45647/unigene-21666.89351	2	2	0
Biological process	GO:0000076	DNA replication checkpoint	1/75	41/156071	0.0195169	0.129458	0.0935199	unigene-115886.1	1	1	0
Biological process	GO:0010239	chloroplast mRNA processing	1/75	42/156071	0.0199882	0.129458	0.0935199	unigene-21666.135267	1	1	0
Biological process	GO:0002679	respiratory burst involved in defense response	1/75	43/156071	0.0204592	0.129458	0.0935199	unigene-21666.75386	1	1	0
Biological process	GO:0019673	GDP-mannose metabolic process	1/75	44/156071	0.0209301	0.129458	0.0935199	unigene-21666.116766	1	1	0
Biological process	GO:0044770	cell cycle phase transition	2/75	467/156071	0.0214708	0.129458	0.0935199	unigene-21666.45647/unigene-21666.89351	2	2	0
Biological process	GO:0045022	early endosome to late endosome transport	1/75	46/156071	0.0218711	0.129458	0.0935199	unigene-55887.2	1	1	0
Biological process	GO:0098927	vesicle-mediated transport between endosomal compartments	1/75	46/156071	0.0218711	0.129458	0.0935199	unigene-55887.2	1	1	0
Biological process	GO:0016236	macroautophagy	2/75	486/156071	0.0231203	0.129458	0.0935199	unigene-21666.82142/unigene-39477.3	2	2	0
Biological process	GO:0007231	osmosensory signaling pathway	1/75	49/156071	0.023281	0.129458	0.0935199	unigene-21666.75386	1	1	0
Biological process	GO:0010262	somatic embryogenesis	1/75	52/156071	0.0246888	0.129458	0.0935199	unigene-21666.71578	1	1	0
Biological process	GO:0007095	mitotic G2 DNA damage checkpoint	1/75	54/156071	0.0256263	0.129458	0.0935199	unigene-21666.45647	1	1	0
Biological process	GO:0031572	G2 DNA damage checkpoint	1/75	54/156071	0.0256263	0.129458	0.0935199	unigene-21666.45647	1	1	0
Biological process	GO:0044773	mitotic DNA damage checkpoint	1/75	56/156071	0.0265629	0.129458	0.0935199	unigene-21666.45647	1	1	0
Biological process	GO:0009800	cinnamic acid biosynthetic process	1/75	61/156071	0.0289004	0.129458	0.0935199	unigene-21666.90795	1	1	0
Biological process	GO:0009803	cinnamic acid metabolic process	1/75	61/156071	0.0289004	0.129458	0.0935199	unigene-21666.90795	1	1	0
Biological process	GO:0010972	negative regulation of G2/M transition of mitotic cell cycle	1/75	68/156071	0.0321637	0.129458	0.0935199	unigene-21666.45647	1	1	0
Biological process	GO:0044818	mitotic G2/M transition checkpoint	1/75	68/156071	0.0321637	0.129458	0.0935199	unigene-21666.45647	1	1	0
Biological process	GO:0045730	respiratory burst	1/75	68/156071	0.0321637	0.129458	0.0935199	unigene-21666.75386	1	1	0
Biological process	GO:1902750	negative regulation of cell cycle G2/M phase transition	1/75	68/156071	0.0321637	0.129458	0.0935199	unigene-21666.45647	1	1	0
Biological process	GO:0031539	positive regulation of anthocyanin metabolic process	1/75	74/156071	0.0349522	0.129458	0.0935199	unigene-21666.126192	1	1	0
Biological process	GO:0044774	mitotic DNA integrity checkpoint	1/75	75/156071	0.0354161	0.129458	0.0935199	unigene-21666.45647	1	1	0
Biological process	GO:0006696	ergosterol biosynthetic process	1/75	76/156071	0.0358799	0.129458	0.0935199	unigene-21666.93366	1	1	0
Biological process	GO:0008204	ergosterol metabolic process	1/75	76/156071	0.0358799	0.129458	0.0935199	unigene-21666.93366	1	1	0
Biological process	GO:0044107	cellular alcohol metabolic process	1/75	76/156071	0.0358799	0.129458	0.0935199	unigene-21666.93366	1	1	0
Biological process	GO:0044108	cellular alcohol biosynthetic process	1/75	76/156071	0.0358799	0.129458	0.0935199	unigene-21666.93366	1	1	0
Biological process	GO:0097384	cellular lipid biosynthetic process	1/75	76/156071	0.0358799	0.129458	0.0935199	unigene-21666.93366	1	1	0
Biological process	GO:0051180	vitamin transport	1/75	77/156071	0.0363434	0.129458	0.0935199	unigene-21666.201092	1	1	0
Biological process	GO:2001142	nicotinate transport	1/75	77/156071	0.0363434	0.129458	0.0935199	unigene-21666.201092	1	1	0
Biological process	GO:2001143	N-methylnicotinate transport	1/75	77/156071	0.0363434	0.129458	0.0935199	unigene-21666.201092	1	1	0
Biological process	GO:0042439	ethanolamine-containing compound metabolic process	1/75	78/156071	0.0368067	0.129458	0.0935199	unigene-21666.148288	1	1	0
Biological process	GO:0070291	N-acylethanolamine metabolic process	1/75	78/156071	0.0368067	0.129458	0.0935199	unigene-21666.148288	1	1	0
Biological process	GO:0000082	G1/S transition of mitotic cell cycle	1/75	84/156071	0.039582	0.13686	0.0988668	unigene-21666.89351	1	1	0
Biological process	GO:0050665	hydrogen peroxide biosynthetic process	1/75	87/156071	0.0409667	0.139287	0.10062	unigene-21666.75386	1	1	0
Biological process	GO:0015697	quaternary ammonium group transport	1/75	90/156071	0.0423494	0.139343	0.100661	unigene-21666.201092	1	1	0
Biological process	GO:0045005	DNA-dependent DNA replication maintenance of fidelity	1/75	90/156071	0.0423494	0.139343	0.100661	unigene-21666.45647	1	1	0
Biological process	GO:0006432	phenylalanyl-tRNA aminoacylation	1/75	106/156071	0.0496907	0.152312	0.110029	unigene-21666.86045	1	1	0
Biological process	GO:0044843	cell cycle G1/S phase transition	1/75	106/156071	0.0496907	0.152312	0.110029	unigene-21666.89351	1	1	0
Biological process	GO:0000712	resolution of meiotic recombination intermediates	1/75	107/156071	0.0501477	0.152312	0.110029	unigene-21666.45647	1	1	0
Biological process	GO:0051512	positive regulation of unidimensional cell growth	1/75	107/156071	0.0501477	0.152312	0.110029	unigene-21666.135213	1	1	0
Biological process	GO:1900490	positive regulation of hydroxymethylglutaryl-CoA reductase (NADPH) activity	1/75	109/156071	0.051061	0.152312	0.110029	unigene-21666.194916	1	1	0
Biological process	GO:2001215	regulation of hydroxymethylglutaryl-CoA reductase (NADPH) activity	1/75	109/156071	0.051061	0.152312	0.110029	unigene-21666.194916	1	1	0
Biological process	GO:0051307	meiotic chromosome separation	1/75	110/156071	0.0515173	0.152312	0.110029	unigene-21666.45647	1	1	0
Biological process	GO:0019432	triglyceride biosynthetic process	1/75	112/156071	0.0524293	0.152794	0.110378	unigene-2150.0	1	1	0
Biological process	GO:0046460	neutral lipid biosynthetic process	1/75	129/156071	0.0601466	0.167372	0.120909	unigene-2150.0	1	1	0
Biological process	GO:0046463	acylglycerol biosynthetic process	1/75	129/156071	0.0601466	0.167372	0.120909	unigene-2150.0	1	1	0
Biological process	GO:0006559	L-phenylalanine catabolic process	1/75	134/156071	0.0624045	0.167372	0.120909	unigene-21666.90795	1	1	0
Biological process	GO:1902222	erythrose 4-phosphate/phosphoenolpyruvate family amino acid catabolic process	1/75	134/156071	0.0624045	0.167372	0.120909	unigene-21666.90795	1	1	0
Biological process	GO:1902653	secondary alcohol biosynthetic process	1/75	138/156071	0.0642071	0.167372	0.120909	unigene-21666.93366	1	1	0
Biological process	GO:0015696	ammonium transport	1/75	139/156071	0.0646572	0.167372	0.120909	unigene-21666.201092	1	1	0
Biological process	GO:1902652	secondary alcohol metabolic process	1/75	139/156071	0.0646572	0.167372	0.120909	unigene-21666.93366	1	1	0
Biological process	GO:0000077	DNA damage checkpoint	1/75	140/156071	0.065107	0.167372	0.120909	unigene-21666.45647	1	1	0
Biological process	GO:0031425	chloroplast RNA processing	1/75	147/156071	0.0682502	0.167372	0.120909	unigene-21666.135267	1	1	0
Biological process	GO:0048639	positive regulation of developmental growth	1/75	149/156071	0.0691464	0.167372	0.120909	unigene-21666.135213	1	1	0
Biological process	GO:0042938	dipeptide transport	1/75	152/156071	0.070489	0.167372	0.120909	unigene-21666.9593	1	1	0
Biological process	GO:0006577	amino-acid betaine metabolic process	1/75	153/156071	0.0709361	0.167372	0.120909	unigene-37713.0	1	1	0
Biological process	GO:0006578	amino-acid betaine biosynthetic process	1/75	153/156071	0.0709361	0.167372	0.120909	unigene-37713.0	1	1	0
Biological process	GO:0019285	glycine betaine biosynthetic process from choline	1/75	153/156071	0.0709361	0.167372	0.120909	unigene-37713.0	1	1	0
Biological process	GO:0031455	glycine betaine metabolic process	1/75	153/156071	0.0709361	0.167372	0.120909	unigene-37713.0	1	1	0
Biological process	GO:0031456	glycine betaine biosynthetic process	1/75	153/156071	0.0709361	0.167372	0.120909	unigene-37713.0	1	1	0
Biological process	GO:0015695	organic cation transport	1/75	155/156071	0.0718297	0.167372	0.120909	unigene-21666.201092	1	1	0
Biological process	GO:0042939	tripeptide transport	1/75	157/156071	0.0727224	0.167372	0.120909	unigene-21666.9593	1	1	0
Biological process	GO:0006641	triglyceride metabolic process	1/75	160/156071	0.0740599	0.167372	0.120909	unigene-2150.0	1	1	0
Biological process	GO:0010345	suberin biosynthetic process	1/75	163/156071	0.0753956	0.167372	0.120909	unigene-21666.194916	1	1	0
Biological process	GO:0000463	maturation of LSU-rRNA from tricistronic rRNA transcript (SSU-rRNA, 5.8S rRNA, LSU-rRNA)	1/75	167/156071	0.0771734	0.167372	0.120909	unigene-21666.211778	1	1	0
Biological process	GO:1901988	negative regulation of cell cycle phase transition	1/75	172/156071	0.079391	0.167372	0.120909	unigene-21666.45647	1	1	0
Biological process	GO:1901991	negative regulation of mitotic cell cycle phase transition	1/75	172/156071	0.079391	0.167372	0.120909	unigene-21666.45647	1	1	0
Biological process	GO:0017000	antibiotic biosynthetic process	1/75	175/156071	0.080719	0.167372	0.120909	unigene-21666.75386	1	1	0
Biological process	GO:0009785	blue light signaling pathway	1/75	176/156071	0.0811613	0.167372	0.120909	unigene-21666.71578	1	1	0
Biological process	GO:0030522	intracellular receptor signaling pathway	1/75	176/156071	0.0811613	0.167372	0.120909	unigene-21666.71578	1	1	0
Biological process	GO:0006638	neutral lipid metabolic process	1/75	177/156071	0.0816034	0.167372	0.120909	unigene-2150.0	1	1	0
Biological process	GO:0006639	acylglycerol metabolic process	1/75	177/156071	0.0816034	0.167372	0.120909	unigene-2150.0	1	1	0
Biological process	GO:0080001	mucilage extrusion from seed coat	1/75	177/156071	0.0816034	0.167372	0.120909	unigene-21666.135213	1	1	0
Biological process	GO:0051353	positive regulation of oxidoreductase activity	1/75	178/156071	0.0820452	0.167372	0.120909	unigene-21666.194916	1	1	0
Biological process	GO:0019695	choline metabolic process	1/75	184/156071	0.0846918	0.168873	0.121993	unigene-37713.0	1	1	0
Biological process	GO:0008284	positive regulation of cell proliferation	1/75	186/156071	0.0855723	0.168873	0.121993	unigene-21666.89351	1	1	0
Biological process	GO:0009958	positive gravitropism	1/75	188/156071	0.086452	0.168873	0.121993	unigene-21666.126192	1	1	0
Biological process	GO:0052542	defense response by callose deposition	1/75	190/156071	0.0873309	0.168873	0.121993	unigene-21666.75386	1	1	0
Biological process	GO:0031537	regulation of anthocyanin metabolic process	1/75	200/156071	0.0917127	0.168873	0.121993	unigene-21666.126192	1	1	0
Biological process	GO:0051341	regulation of oxidoreductase activity	1/75	201/156071	0.0921498	0.168873	0.121993	unigene-21666.194916	1	1	0
Biological process	GO:0007093	mitotic cell cycle checkpoint	1/75	202/156071	0.0925866	0.168873	0.121993	unigene-21666.45647	1	1	0
Biological process	GO:0045930	negative regulation of mitotic cell cycle	1/75	205/156071	0.0938958	0.168873	0.121993	unigene-21666.45647	1	1	0
Biological process	GO:0010272	response to silver ion	1/75	206/156071	0.0943318	0.168873	0.121993	unigene-21666.135213	1	1	0
Biological process	GO:0071217	cellular response to external biotic stimulus	1/75	206/156071	0.0943318	0.168873	0.121993	unigene-21666.135213	1	1	0
Biological process	GO:0006896	Golgi to vacuole transport	1/75	209/156071	0.0956386	0.168873	0.121993	unigene-21666.107450	1	1	0
Biological process	GO:0034308	primary alcohol metabolic process	1/75	210/156071	0.0960738	0.168873	0.121993	unigene-21666.148288	1	1	0
Biological process	GO:0016129	phytosteroid biosynthetic process	1/75	214/156071	0.0978124	0.168873	0.121993	unigene-21666.93366	1	1	0
Biological process	GO:0071483	cellular response to blue light	1/75	215/156071	0.0982465	0.168873	0.121993	unigene-21666.71578	1	1	0
Biological process	GO:1902183	regulation of shoot apical meristem development	1/75	219/156071	0.0999811	0.168873	0.121993	unigene-21666.135213	1	1	0
Biological process	GO:0033500	carbohydrate homeostasis	1/75	220/156071	0.100414	0.168873	0.121993	unigene-21666.75386	1	1	0
Biological process	GO:0042753	positive regulation of circadian rhythm	1/75	220/156071	0.100414	0.168873	0.121993	unigene-21666.126192	1	1	0
Biological process	GO:0009649	entrainment of circadian clock	1/75	222/156071	0.10128	0.168873	0.121993	unigene-21666.134539	1	1	0
Biological process	GO:0030307	positive regulation of cell growth	1/75	222/156071	0.10128	0.168873	0.121993	unigene-21666.135213	1	1	0
Biological process	GO:1902074	response to salt	1/75	227/156071	0.10344	0.168873	0.121993	unigene-21666.135213	1	1	0
Biological process	GO:0006071	glycerol metabolic process	1/75	231/156071	0.105165	0.168873	0.121993	unigene-2150.0	1	1	0
Biological process	GO:0010143	cutin biosynthetic process	1/75	232/156071	0.105595	0.168873	0.121993	unigene-21666.194916	1	1	0
Biological process	GO:0048359	mucilage metabolic process involved in seed coat development	1/75	233/156071	0.106026	0.168873	0.121993	unigene-21666.135213	1	1	0
Biological process	GO:0046898	response to cycloheximide	1/75	235/156071	0.106886	0.168873	0.121993	unigene-21666.135213	1	1	0
Biological process	GO:1901654	response to ketone	1/75	237/156071	0.107746	0.168873	0.121993	unigene-21666.135213	1	1	0
Biological process	GO:0018107	peptidyl-threonine phosphorylation	1/75	243/156071	0.110319	0.168873	0.121993	unigene-21666.201747	1	1	0
Biological process	GO:0018210	peptidyl-threonine modification	1/75	243/156071	0.110319	0.168873	0.121993	unigene-21666.201747	1	1	0
Biological process	GO:0016128	phytosteroid metabolic process	1/75	244/156071	0.110747	0.168873	0.121993	unigene-21666.93366	1	1	0
Biological process	GO:0060992	response to fungicide	1/75	244/156071	0.110747	0.168873	0.121993	unigene-21666.135213	1	1	0
Biological process	GO:0051304	chromosome separation	1/75	247/156071	0.112031	0.168873	0.121993	unigene-21666.45647	1	1	0
Biological process	GO:1902182	shoot apical meristem development	1/75	248/156071	0.112458	0.168873	0.121993	unigene-21666.135213	1	1	0
Biological process	GO:0052545	callose localization	1/75	249/156071	0.112885	0.168873	0.121993	unigene-21666.75386	1	1	0
Biological process	GO:0033037	polysaccharide localization	1/75	250/156071	0.113312	0.168873	0.121993	unigene-21666.75386	1	1	0
Biological process	GO:0006817	phosphate ion transport	1/75	251/156071	0.113739	0.168873	0.121993	unigene-82092.1	1	1	0
Biological process	GO:0010191	mucilage metabolic process	1/75	254/156071	0.115018	0.168873	0.121993	unigene-21666.135213	1	1	0
Biological process	GO:0016925	protein sumoylation	1/75	254/156071	0.115018	0.168873	0.121993	unigene-21666.172802	1	1	0
Biological process	GO:1903409	reactive oxygen species biosynthetic process	1/75	254/156071	0.115018	0.168873	0.121993	unigene-21666.75386	1	1	0
Biological process	GO:0009943	adaxial/abaxial axis specification	1/75	256/156071	0.11587	0.168873	0.121993	unigene-21666.135213	1	1	0
Biological process	GO:0009944	polarity specification of adaxial/abaxial axis	1/75	256/156071	0.11587	0.168873	0.121993	unigene-21666.135213	1	1	0
Biological process	GO:0048572	short-day photoperiodism	1/75	258/156071	0.116721	0.168873	0.121993	unigene-54902.0	1	1	0
Biological process	GO:0048575	short-day photoperiodism, flowering	1/75	258/156071	0.116721	0.168873	0.121993	unigene-54902.0	1	1	0
Biological process	GO:0009074	aromatic amino acid family catabolic process	1/75	262/156071	0.11842	0.170125	0.122897	unigene-21666.90795	1	1	0
Biological process	GO:0043069	negative regulation of programmed cell death	1/75	266/156071	0.120117	0.170183	0.122939	unigene-21666.75386	1	1	0
Biological process	GO:0010099	regulation of photomorphogenesis	1/75	267/156071	0.12054	0.170183	0.122939	unigene-21666.126192	1	1	0
Biological process	GO:0071216	cellular response to biotic stimulus	1/75	268/156071	0.120963	0.170183	0.122939	unigene-21666.135213	1	1	0
Biological process	GO:0019400	alditol metabolic process	1/75	271/156071	0.122232	0.170263	0.122997	unigene-2150.0	1	1	0
Biological process	GO:0045995	regulation of embryonic development	1/75	273/156071	0.123077	0.170263	0.122997	unigene-21666.135213	1	1	0
Biological process	GO:0042335	cuticle development	1/75	276/156071	0.124343	0.170263	0.122997	unigene-21666.194916	1	1	0
Biological process	GO:0006558	L-phenylalanine metabolic process	1/75	280/156071	0.126028	0.170263	0.122997	unigene-21666.90795	1	1	0
Biological process	GO:0010025	wax biosynthetic process	1/75	280/156071	0.126028	0.170263	0.122997	unigene-21666.194916	1	1	0
Biological process	GO:1902221	erythrose 4-phosphate/phosphoenolpyruvate family amino acid metabolic process	1/75	280/156071	0.126028	0.170263	0.122997	unigene-21666.90795	1	1	0
Biological process	GO:0065001	specification of axis polarity	1/75	286/156071	0.128549	0.171399	0.123818	unigene-21666.135213	1	1	0
Biological process	GO:1900426	positive regulation of defense response to bacterium	1/75	286/156071	0.128549	0.171399	0.123818	unigene-21666.122250	1	1	0
Biological process	GO:0009820	alkaloid metabolic process	1/75	290/156071	0.130226	0.172497	0.124611	unigene-21666.231610	1	1	0
Biological process	GO:0010166	wax metabolic process	1/75	292/156071	0.131064	0.172497	0.124611	unigene-21666.194916	1	1	0
Biological process	GO:0070417	cellular response to cold	1/75	304/156071	0.136071	0.177198	0.128007	unigene-21666.51712	1	1	0
Biological process	GO:0009407	toxin catabolic process	1/75	308/156071	0.137734	0.177198	0.128007	unigene-21666.245522	1	1	0
Biological process	GO:0010214	seed coat development	1/75	309/156071	0.138149	0.177198	0.128007	unigene-21666.135213	1	1	0
Biological process	GO:0048506	regulation of timing of meristematic phase transition	1/75	311/156071	0.138979	0.177198	0.128007	unigene-54902.0	1	1	0
Biological process	GO:0048510	regulation of timing of transition from vegetative to reproductive phase	1/75	311/156071	0.138979	0.177198	0.128007	unigene-54902.0	1	1	0
Biological process	GO:1901570	fatty acid derivative biosynthetic process	1/75	314/156071	0.140222	0.177618	0.12831	unigene-21666.194916	1	1	0
Biological process	GO:0006892	post-Golgi vesicle-mediated transport	1/75	316/156071	0.14105	0.177618	0.12831	unigene-21666.107450	1	1	0
Biological process	GO:0006857	oligopeptide transport	1/75	322/156071	0.143528	0.17963	0.129764	unigene-21666.9593	1	1	0
Biological process	GO:0010948	negative regulation of cell cycle process	1/75	335/156071	0.148875	0.185185	0.133777	unigene-21666.45647	1	1	0
Biological process	GO:0010311	lateral root formation	1/75	341/156071	0.151331	0.186475	0.134709	unigene-21666.226134	1	1	0
Biological process	GO:0006855	drug transmembrane transport	1/75	342/156071	0.15174	0.186475	0.134709	unigene-95563.0	1	1	0
Biological process	GO:0010229	inflorescence development	1/75	357/156071	0.157847	0.191381	0.138252	unigene-54902.0	1	1	0
Biological process	GO:0030422	production of siRNA involved in RNA interference	1/75	362/156071	0.159873	0.191381	0.138252	unigene-50694.0	1	1	0
Biological process	GO:0045927	positive regulation of growth	1/75	363/156071	0.160278	0.191381	0.138252	unigene-21666.135213	1	1	0
Biological process	GO:0071470	cellular response to osmotic stress	1/75	363/156071	0.160278	0.191381	0.138252	unigene-21666.75386	1	1	0
Biological process	GO:0045132	meiotic chromosome segregation	1/75	364/156071	0.160683	0.191381	0.138252	unigene-21666.45647	1	1	0
Biological process	GO:0009226	nucleotide-sugar biosynthetic process	1/75	367/156071	0.161895	0.191381	0.138252	unigene-21666.116766	1	1	0
Biological process	GO:1901568	fatty acid derivative metabolic process	1/75	368/156071	0.162298	0.191381	0.138252	unigene-21666.194916	1	1	0
Biological process	GO:0042537	benzene-containing compound metabolic process	1/75	372/156071	0.163911	0.192172	0.138824	unigene-21666.90795	1	1	0
Biological process	GO:0002833	positive regulation of response to biotic stimulus	1/75	387/156071	0.169932	0.198093	0.143101	unigene-21666.122250	1	1	0
Biological process	GO:0060548	negative regulation of cell death	1/75	392/156071	0.17193	0.199076	0.143811	unigene-21666.75386	1	1	0
Biological process	GO:0006623	protein targeting to vacuole	1/75	394/156071	0.172728	0.199076	0.143811	unigene-21666.107450	1	1	0
Biological process	GO:0040034	regulation of development, heterochronic	1/75	401/156071	0.175514	0.200027	0.144498	unigene-54902.0	1	1	0
Biological process	GO:0043902	positive regulation of multi-organism process	1/75	401/156071	0.175514	0.200027	0.144498	unigene-21666.122250	1	1	0
Biological process	GO:0000470	maturation of LSU-rRNA	1/75	406/156071	0.177498	0.201164	0.14532	unigene-21666.211778	1	1	0
Biological process	GO:2000030	regulation of response to red or far red light	1/75	409/156071	0.178686	0.201392	0.145484	unigene-21666.126192	1	1	0
Biological process	GO:0042398	cellular modified amino acid biosynthetic process	1/75	415/156071	0.181058	0.202714	0.14644	unigene-37713.0	1	1	0
Biological process	GO:0032103	positive regulation of response to external stimulus	1/75	417/156071	0.181847	0.202714	0.14644	unigene-21666.122250	1	1	0
Biological process	GO:0016246	RNA interference	1/75	422/156071	0.183816	0.203796	0.147221	unigene-50694.0	1	1	0
Biological process	GO:0010114	response to red light	1/75	426/156071	0.185388	0.204428	0.147677	unigene-21666.126192	1	1	0
Biological process	GO:0006289	nucleotide-excision repair	1/75	441/156071	0.191256	0.208612	0.1507	unigene-21666.229251	1	1	0
Biological process	GO:0009404	toxin metabolic process	1/75	441/156071	0.191256	0.208612	0.1507	unigene-21666.245522	1	1	0
Biological process	GO:0072665	protein localization to vacuole	1/75	454/156071	0.196308	0.208612	0.1507	unigene-21666.107450	1	1	0
Biological process	GO:0072666	establishment of protein localization to vacuole	1/75	454/156071	0.196308	0.208612	0.1507	unigene-21666.107450	1	1	0
Biological process	GO:0009798	axis specification	1/75	457/156071	0.19747	0.208612	0.1507	unigene-21666.135213	1	1	0
Biological process	GO:0010218	response to far red light	1/75	458/156071	0.197857	0.208612	0.1507	unigene-21666.126192	1	1	0
Biological process	GO:0009955	adaxial/abaxial pattern specification	1/75	459/156071	0.198243	0.208612	0.1507	unigene-21666.135213	1	1	0
Biological process	GO:0015718	monocarboxylic acid transport	1/75	460/156071	0.19863	0.208612	0.1507	unigene-21666.201092	1	1	0
Biological process	GO:0043067	regulation of programmed cell death	1/75	462/156071	0.199402	0.208612	0.1507	unigene-21666.75386	1	1	0
Biological process	GO:0009225	nucleotide-sugar metabolic process	1/75	463/156071	0.199788	0.208612	0.1507	unigene-21666.116766	1	1	0
Biological process	GO:0042147	retrograde transport, endosome to Golgi	1/75	465/156071	0.200559	0.208612	0.1507	unigene-21666.11606	1	1	0
Biological process	GO:0010102	lateral root morphogenesis	1/75	471/156071	0.202868	0.208612	0.1507	unigene-21666.226134	1	1	0
Biological process	GO:1900424	regulation of defense response to bacterium	1/75	473/156071	0.203637	0.208612	0.1507	unigene-21666.122250	1	1	0
Biological process	GO:0090332	stomatal closure	1/75	475/156071	0.204404	0.208612	0.1507	unigene-21666.11606	1	1	0
Biological process	GO:0001666	response to hypoxia	1/75	479/156071	0.205937	0.208612	0.1507	unigene-21666.135213	1	1	0
Biological process	GO:0010101	post-embryonic root morphogenesis	1/75	481/156071	0.206702	0.208612	0.1507	unigene-21666.226134	1	1	0
Biological process	GO:0007131	reciprocal meiotic recombination	1/75	486/156071	0.208612	0.208612	0.1507	unigene-21666.45647	1	1	0
Biological process	GO:0035825	homologous recombination	1/75	486/156071	0.208612	0.208612	0.1507	unigene-21666.45647	1	1	0
Biological process	GO:0046283	anthocyanin-containing compound metabolic process	1/75	486/156071	0.208612	0.208612	0.1507	unigene-21666.126192	1	1	0
