# Supplementary material for: RNA-seq and phytohormone analysis reveals the culm color variation of Bambusa oldhamii Munro
Source: PeerJ. 2022 Jan 13;10:e12796. doi: 10.7717/peerj.12796 (PMC8761368; doi:10.7717/peerj.12796)
Supplement: Supplemental Information 21 [file peerj-10-12796-s021.xlsx]

## Sheet: Sheet1
#Kegg_pathway	ko_id	Cluter_frequency	Genome_frequency	P-value	Corrected_P-value	GeneID	KEGG Orthology
Circadian rhythm - plant	ko04712	3 out of 39 7.69230769230769%	886 out of 82587 1.07280806906656%	0.00843962	0.337585	unigene-54902.0;unigene-21666.126192;unigene-21666.239597	K16223+K16241+K16241
Phenylalanine metabolism	ko00360	2 out of 39 5.12820512820513%	503 out of 82587 0.609054693838013%	0.0236452	0.945809	unigene-21666.148288;unigene-21666.90795	K01426+K13064
Autophagy - other	ko04136	2 out of 39 5.12820512820513%	796 out of 82587 0.96383208010946%	0.0543832	1	unigene-21666.214216;unigene-39477.3	K08269+K17908
Nucleotide excision repair	ko03420	2 out of 39 5.12820512820513%	940 out of 82587 1.13819366244082%	0.0727409	1	unigene-21666.9034;unigene-21666.229251	K10756+K10842
Aminoacyl-tRNA biosynthesis	ko00970	2 out of 39 5.12820512820513%	963 out of 82587 1.16604308184097%	0.0758381	1	unigene-21666.86045;unigene-21666.100556	K01889+K01892
Sesquiterpenoid and triterpenoid biosynthesis	ko00909	1 out of 39 2.56410256410256%	198 out of 82587 0.23974717570562%	0.0893851	1	unigene-21666.93366	K00801
Glycerolipid metabolism	ko00561	2 out of 39 5.12820512820513%	1476 out of 82587 1.78720621889644%	0.153774	1	unigene-21666.87695;unigene-2150.0	K00002+K11155
Diterpenoid biosynthesis	ko00904	1 out of 39 2.56410256410256%	362 out of 82587 0.43832564447189%	0.157484	1	unigene-74133.0	K13070
Phagosome	ko04145	2 out of 39 5.12820512820513%	1521 out of 82587 1.84169421337499%	0.161216	1	unigene-21666.11606;unigene-55887.2	K00921+K07889
Steroid biosynthesis	ko00100	1 out of 39 2.56410256410256%	452 out of 82587 0.54730163342899%	0.192719	1	unigene-21666.93366	K00801
Pentose and glucuronate interconversions	ko00040	1 out of 39 2.56410256410256%	556 out of 82587 0.673229442890528%	0.231649	1	unigene-21666.87695	K00002
Mismatch repair	ko03430	1 out of 39 2.56410256410256%	560 out of 82587 0.67807282017751%	0.233109	1	unigene-21666.9034	K10756
DNA replication	ko03030	1 out of 39 2.56410256410256%	633 out of 82587 0.766464455664935%	0.259287	1	unigene-21666.9034	K10756
alpha-Linolenic acid metabolism	ko00592	1 out of 39 2.56410256410256%	691 out of 82587 0.836693426326177%	0.279463	1	unigene-21666.167590	K00224
Basal transcription factors	ko03022	1 out of 39 2.56410256410256%	695 out of 82587 0.841536803613159%	0.280835	1	unigene-21666.229251	K10842
Homologous recombination	ko03440	1 out of 39 2.56410256410256%	720 out of 82587 0.871807911656798%	0.28935	1	unigene-21666.45647	K08991
Photosynthesis	ko00195	1 out of 39 2.56410256410256%	740 out of 82587 0.896024798091709%	0.296091	1	unigene-21666.231610	K02717
Glycine, serine and threonine metabolism	ko00260	1 out of 39 2.56410256410256%	924 out of 82587 1.11882015329289%	0.355255	1	unigene-37713.0	K00130
Phosphatidylinositol signaling system	ko04070	1 out of 39 2.56410256410256%	997 out of 82587 1.20721178878032%	0.37736	1	unigene-21666.11606	K00921
Inositol phosphate metabolism	ko00562	1 out of 39 2.56410256410256%	1052 out of 82587 1.27380822647632%	0.393525	1	unigene-21666.11606	K00921
Fructose and mannose metabolism	ko00051	1 out of 39 2.56410256410256%	1063 out of 82587 1.28712751401552%	0.396709	1	unigene-21666.116766	K00966
Arginine and proline metabolism	ko00330	1 out of 39 2.56410256410256%	1157 out of 82587 1.40094688025961%	0.423258	1	unigene-21666.148288	K01426
Tryptophan metabolism	ko00380	1 out of 39 2.56410256410256%	1294 out of 82587 1.56683255233875%	0.459924	1	unigene-21666.148288	K01426
Glutathione metabolism	ko00480	1 out of 39 2.56410256410256%	1333 out of 82587 1.61405548088682%	0.46994	1	unigene-21666.231685	K00799
Amino sugar and nucleotide sugar metabolism	ko00520	1 out of 39 2.56410256410256%	1416 out of 82587 1.7145555595917%	0.490656	1	unigene-21666.116766	K00966
Plant-pathogen interaction	ko04626	4 out of 39 10.2564102564103%	7956 out of 82587 9.63347742380762%	0.525657	1	unigene-21666.122250;unigene-21666.75386;unigene-21666.8756;unigene-21666.969	K13437+K13447+K13457+K13457
Protein processing in endoplasmic reticulum	ko04141	2 out of 39 5.12820512820513%	4150 out of 82587 5.02500393524405%	0.589884	1	unigene-38286.0;unigene-21666.194916	K09561+K10661
MAPK signaling pathway - plant	ko04016	2 out of 39 5.12820512820513%	4221 out of 82587 5.11097388208798%	0.59931	1	unigene-21666.75386;unigene-21666.173757	K13447+K20718
Plant hormone signal transduction	ko04075	2 out of 39 5.12820512820513%	4273 out of 82587 5.17393778681875%	0.606115	1	unigene-21666.73775;unigene-21666.64902	K14484+K14494
Starch and sucrose metabolism	ko00500	1 out of 39 2.56410256410256%	1992 out of 82587 2.41200188891714%	0.614199	1	unigene-21666.100803	K01177
Phenylpropanoid biosynthesis	ko00940	1 out of 39 2.56410256410256%	2028 out of 82587 2.45559228449998%	0.620864	1	unigene-21666.90795	K13064
Ribosome	ko03010	3 out of 39 7.69230769230769%	6733 out of 82587 8.15261481831281%	0.626429	1	unigene-21666.152817;unigene-21666.211778;unigene-42832.0	K02881+K02937+K02984
RNA degradation	ko03018	1 out of 39 2.56410256410256%	2231 out of 82587 2.70139368181433%	0.656403	1	unigene-55057.0	K03681
Oxidative phosphorylation	ko00190	1 out of 39 2.56410256410256%	2278 out of 82587 2.75830336493637%	0.664156	1	unigene-21666.241021	K03963
Ubiquitin mediated proteolysis	ko04120	1 out of 39 2.56410256410256%	2367 out of 82587 2.86606850957172%	0.678373	1	unigene-38286.0	K09561
Endocytosis	ko04144	1 out of 39 2.56410256410256%	2965 out of 82587 3.59015341397557%	0.759791	1	unigene-55887.2	K07889
Glycolysis / Gluconeogenesis	ko00010	1 out of 39 2.56410256410256%	3042 out of 82587 3.68338842674997%	0.768688	1	unigene-21666.87695	K00002
Biosynthesis of secondary metabolites	ko01110	6 out of 39 15.3846153846154%	15960 out of 82587 19.325075375059%	0.791767	1	unigene-21666.87695;unigene-21666.167590;unigene-21666.93366;unigene-21666.116766;unigene-21666.90795;unigene-74133.0	K00002+K00224+K00801+K00966+K13064+K13070
Metabolic pathways	ko01100	12 out of 39 30.7692307692308%	32375 out of 82587 39.2010849165123%	0.89459	1	unigene-21666.87695;unigene-37713.0;unigene-21666.231685;unigene-21666.93366;unigene-21666.11606;unigene-21666.116766;unigene-21666.118072;unigene-21666.100803;unigene-21666.148288;unigene-21666.241021;unigene-2150.0;unigene-21666.90795	K00002+K00130+K00799+K00801+K00921+K00966+K01070+K01177+K01426+K03963+K11155+K13064
Carbon metabolism	ko01200	1 out of 39 2.56410256410256%	6462 out of 82587 7.82447600711976%	0.958344	1	unigene-21666.118072	K01070
