# Supplementary material for: RNA-seq and phytohormone analysis reveals the culm color variation of Bambusa oldhamii Munro
Source: PeerJ. 2022 Jan 13;10:e12796. doi: 10.7717/peerj.12796 (PMC8761368; doi:10.7717/peerj.12796)
Supplement: Supplemental Information 22 [file peerj-10-12796-s022.xlsx]

## Sheet: Sheet1
ID	HLZ_1	HLZ_2	HLZ_3	LZ_1	LZ_2	LZ_3
unigene-21666.126192	1.76	2.53	1.89	0.02	0	0.07
unigene-21666.139384	0.95	2.49	0.68	0	0	0
unigene-21666.15994	3.8	19.61	3.26	0.85	0.42	1.18
unigene-21666.166463	11.55	9.66	14.62	2.46	1.6	0.12
unigene-21666.172802	0.45	0.23	0.63	2.13	1.89	1.96
unigene-21666.181028	30.8	31.3	36.22	14.99	7.3	14.51
unigene-21666.182460	0.9	2.6	1.86	9.26	10.02	3.82
unigene-21666.194872	0.32	1.01	0.56	0	0	0
unigene-21666.198603	1.96	3.19	2.74	0.65	0.32	0.6
unigene-21666.212035	1.31	0.39	1.22	0	0	0
unigene-21666.218036	0	0	0	3.63	3.59	0.52
unigene-21666.239597	0.08	0.02	0.04	1.05	0.72	1.06
unigene-21666.41135	0	0	0	0.66	0.48	0.73
unigene-21666.57044	0	0	0	0.57	2.01	1.27
unigene-21666.64902	3.81	4.24	3.78	0.4	0.72	0.51
unigene-21666.71578	11.34	17.11	15.84	0.2	0	0.36
unigene-21666.73775	8.6	6.5	6.11	1.74	1.14	0.85
unigene-21666.98709	0.36	0.19	0.3	0	0	0
unigene-43769.0	3.28	2.1	3.73	0.06	0.33	0.17
unigene-5611.0	0.52	0.37	0	2.87	6.07	8.12
unigene-61591.0	1.35	2.57	1.55	0.14	0.31	0.24
